# Supplementary material for: LINC01021 Attenuates Expression and Affects Alternative Splicing of a Subset of p53-Regulated Genes
Source: MDPI journal article supplement (doi:10.3390/cancers16091639), 2024-04-24
Supplement: s1 [file s1]

# ***LINC01021* attenuates expression and affects alternative splicing of a subset of p53-regulated genes**

**Markus Kaller<sup>1</sup>, Ignasi Forné<sup>2</sup>, Axel Imhof<sup>2</sup> and Heiko Hermeking<sup>1,3,4\*</sup>**

## **Supplementary Information**

### **Supplementary Figures**

**Figure S1:** Original, uncropped Western Blot images.

### **Supplementary Tables**

**Table S1:** Guide RNA sequences used for CRISPR/Cas9-mediated deletions within the *LINC01021* promoter.

**Table S2:** Oligonucleotides used for cloning and genotyping.

**Table S3:** Oligonucleotides used for qRT-PCR.

**Table S4:** List of significantly regulated mRNAs.

This table includes the list of mRNAs significantly regulated (fold change >1.5) regulated in *LINC01021* wild-type cells and/or KO cells. Log<sub>2</sub> fold changes and FDR-adjusted p-values (padj) in *LINC01021* wt and KO cells as determined by DESEQ2 are provided.

**Table S5:** List of differentially regulated mRNAs.

This table includes the list of mRNAs with significant differences in regulation between *LINC01021* wild-type cells and KO cells. Log<sub>2</sub> fold changes and FDR-adjusted p-values (padj) in *LINC01021* wild-type cells and KO cells as determined by DESEQ2 are provided.

**Table S6:** List of differentially regulated transcript isoforms.

This table includes the list of transcript isoforms differentially regulated between *LINC01021* wild-type cells and KO cells. Log<sub>2</sub> fold changes and FDR-adjusted p-values (padj) in *LINC01021* wild-type cells and KO cells as determined by DESEQ2 are provided.

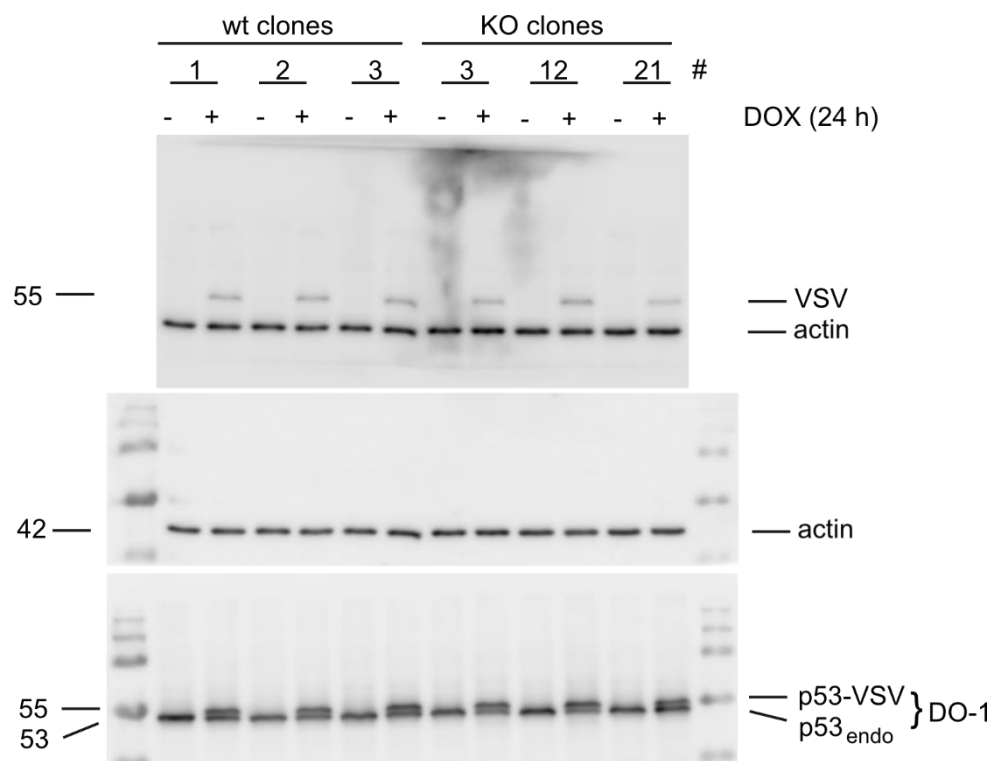

**Figure S1:** Original, uncropped Western blot images.

**Table S1:****Guide RNA sequences used for CRISPR/Cas9-mediated deletions within the *LINC01021* promoter**

| guide RNA name           | sequence 5'-3'       | Genomic coordinates (hg38) |
|--------------------------|----------------------|----------------------------|
| <i>LINC01021</i> guide 1 | AGGGGTCCCTAGAGAATTTC | chr5:27472086-27472105     |
| <i>LINC01021</i> guide 2 | GAGGAATTCATGCCTTGCAA | chr5:27472235-27472254     |

**Table S2:****Oligonucleotides used for cloning and genotyping**

| Primer name                  | sequence 5'-3'                     |
|------------------------------|------------------------------------|
| <i>LINC01021</i> screen Fwd  | AAGGAAACCTCAAAACGTGAAGGAC          |
| <i>LINC01021</i> screen Rev  | CATTTCTCAAGCCCCGTGTTTGGG           |
| <i>LINC01021</i> cloning Fwd | TTTACTAGTCTGGGAATCAATGTGTGAGGT     |
| <i>LINC01021</i> cloning Rev | TTTGAGCTCTTAAGCCCCTCATTCGTTATATTTT |

**Table S3:****Oligonucleotides used for qPCR**

| Primer name            | sequence 5'-3'               |
|------------------------|------------------------------|
| <i>LINC01021</i> Fwd   | TGTTTTCTTTTTGCCCAAT          |
| <i>LINC01021</i> Rev   | CGCCTGGTAAAACAACCACT         |
| <i>EZH2</i> Fwd        | CGCTTTTCTGTAGGCGATGT         |
| <i>EZH2</i> Rev        | TGGGTGTTGCATGAAAAGAA         |
| <i>HDAC3</i> Fwd       | GGCCTATTTCTACGACCCCG         |
| <i>HDAC3</i> Rev       | TGGTATGGCTTGAAGACGATCA       |
| <i>BTG1</i> Fwd        | CAAGGGATCGGGTTACCGTTGT       |
| <i>BTG1</i> Rev        | AGCCATCCTCTCCAATTCTGTAGG     |
| <i>FAS</i> Fwd         | ATGGTGTCAATGAAGCCAAA         |
| <i>FAS</i> Rev         | TCCATGAAGTTGATGCCAAT         |
| <i>PMAIP1/NOXA</i> Fwd | GGAGATGCCTGGGAAGAAG          |
| <i>PMAIP1/NOXA</i> Rev | CCTGAGTTGAGTAGCACACTCG       |
| <i>DKK1</i> Fwd        | CAGGCGTGCAAATCTGTCT          |
| <i>DKK1</i> Rev        | AATGATTTTGTATCAGAAGACACACATA |
| <i>TP53</i> Fwd        | CCTCAGCATCTTATCCGAGTGG       |
| <i>TP53</i> Rev        | TGGATGGTGGTACAGTCAGAGC       |

Table S4:

## List of significantly regulated mRNAs

| gene symbol          | log2FoldChange (+DOX vs -DOX) (LINC01021 wt) | padj        | gene symbol            | log2FoldChange (+DOX vs -DOX) (LINC01021 KO) | padj        |
|----------------------|----------------------------------------------|-------------|------------------------|----------------------------------------------|-------------|
| <i>GDF15</i>         | 5,870                                        | 2,54E-53    | <i>GDF15</i>           | 6,253                                        | 1,66E-54    |
| <i>INPP5D</i>        | 5,336                                        | 8,19E-60    | <i>COL17A1</i>         | 6,224                                        | 6,89E-40    |
| <i>RP3-510D11.2</i>  | 4,509                                        | 3,36E-23    | <i>INPP5D</i>          | 6,021                                        | 3,28E-57    |
| <i>COL17A1</i>       | 4,232                                        | 6,14E-27    | <i>TENM4</i>           | 5,897                                        | 4,86E-17    |
| <i>TENM4</i>         | 4,161                                        | 1,95E-09    | <i>KRTAP2-3</i>        | 5,306                                        | 2,52E-08    |
| <i>LAMC3</i>         | 3,995                                        | 3,77E-18    | <i>SORCS2</i>          | 4,628                                        | 8,21E-12    |
| <i>KRTAP2-3</i>      | 3,584                                        | 0,000853193 | <i>GJB4</i>            | 4,607                                        | 4,47E-10    |
| <i>CEL</i>           | 3,578                                        | 8,22E-21    | <i>RP3-510D11.2</i>    | 4,467                                        | 4,87E-26    |
| <i>NGFR</i>          | 3,461                                        | 1,50E-45    | <i>NUPR1</i>           | 4,243                                        | 1,20E-07    |
| <i>NUPR1</i>         | 3,304                                        | 0,000477478 | <i>ROBO4</i>           | 4,132                                        | 1,77E-08    |
| <i>MDM2</i>          | 3,256                                        | 6,32E-53    | <i>LAMC3</i>           | 4,017                                        | 2,71E-21    |
| <i>SORCS2</i>        | 3,209                                        | 9,31E-06    | <i>PVRL4</i>           | 3,973                                        | 2,30E-20    |
| <i>ACTA2</i>         | 3,045                                        | 7,91E-17    | <i>TREM2</i>           | 3,814                                        | 2,74E-11    |
| <i>CDKN1A</i>        | 2,968                                        | 1,69E-63    | <i>CEL</i>             | 3,738                                        | 6,11E-24    |
| <i>TP53I3</i>        | 2,878                                        | 9,21E-09    | <i>ACTA2</i>           | 3,687                                        | 1,72E-24    |
| <i>ROBO4</i>         | 2,848                                        | 0,000456403 | <i>TP53I3</i>          | 3,674                                        | 1,17E-14    |
| <i>TNFSF9</i>        | 2,787                                        | 1,69E-21    | <i>MDM2</i>            | 3,551                                        | 2,49E-63    |
| <i>PVRL4</i>         | 2,708                                        | 1,61E-10    | <i>LYNX1</i>           | 3,470                                        | 7,10E-16    |
| <i>TREM2</i>         | 2,657                                        | 1,81E-06    | <i>ZNF114</i>          | 3,432                                        | 1,43E-08    |
| <i>ZNF114</i>        | 2,641                                        | 2,10E-05    | <i>PRODH</i>           | 3,298                                        | 5,26E-08    |
| <i>LYNX1</i>         | 2,638                                        | 7,77E-10    | <i>PERM1</i>           | 3,295                                        | 0,000237434 |
| <i>MYH16</i>         | 2,629                                        | 2,48E-05    | <i>KRTAP3-1</i>        | 3,286                                        | 7,40E-22    |
| <i>ZMAT3</i>         | 2,615                                        | 3,46E-47    | <i>SAA2</i>            | 3,285                                        | 1,59E-06    |
| <i>RRM2B</i>         | 2,546                                        | 1,05E-39    | <i>DQX1</i>            | 3,267                                        | 6,29E-11    |
| <i>CD70</i>          | 2,535                                        | 1,02E-10    | <i>UNC13A</i>          | 3,213                                        | 8,82E-11    |
| <i>GJB4</i>          | 2,527                                        | 1,84E-06    | <i>NGFR</i>            | 3,200                                        | 2,84E-39    |
| <i>RP5-1063M23.1</i> | 2,413                                        | 0,000134606 | <i>SCN3B</i>           | 3,188                                        | 7,04E-07    |
| <i>FLG-AS1</i>       | 2,342                                        | 6,23E-26    | <i>PXDN</i>            | 3,130                                        | 0,011718444 |
| <i>HSD3BP5</i>       | 2,335                                        | 0,001419719 | <i>DKK1</i>            | 3,120                                        | 1,42E-27    |
| <i>LAPTM5</i>        | 2,330                                        | 8,58E-07    | <i>CFAP74</i>          | 3,109                                        | 1,18E-10    |
| <i>CAPN8</i>         | 2,318                                        | 1,81E-19    | <i>CYP3A7-CYP3A51P</i> | 3,051                                        | 2,95E-05    |
| <i>MVP</i>           | 2,296                                        | 3,39E-14    | <i>MYH16</i>           | 3,049                                        | 1,39E-08    |
| <i>EPHB1</i>         | 2,279                                        | 0,015771702 | <i>HECW2</i>           | 3,043                                        | 2,92E-05    |
| <i>SLC6A12</i>       | 2,266                                        | 6,36E-05    | <i>CDKN1A</i>          | 3,035                                        | 4,13E-67    |
| <i>EHF</i>           | 2,258                                        | 1,01E-06    | <i>COL5A1</i>          | 3,006                                        | 1,76E-11    |
| <i>LINC00475</i>     | 2,250                                        | 0,000217047 | <i>SERPINB5</i>        | 3,002                                        | 2,45E-17    |

|                        |       |             |                     |       |             |
|------------------------|-------|-------------|---------------------|-------|-------------|
| <i>CYP3A7-CYP3A51P</i> | 2,238 | 0,007431204 | <i>FLG-AS1</i>      | 2,989 | 4,14E-43    |
| <i>VWCE</i>            | 2,234 | 1,03E-08    | <i>CRYAB</i>        | 2,966 | 0,003214146 |
| <i>PIK3IP1</i>         | 2,233 | 0,000234631 | <i>EHF</i>          | 2,930 | 1,58E-10    |
| <i>COL5A1</i>          | 2,149 | 3,71E-06    | <i>RP11-83N9.5</i>  | 2,869 | 1,56E-06    |
| <i>ATG9B</i>           | 2,139 | 0,043400808 | <i>HSD3BP5</i>      | 2,826 | 2,95E-05    |
| <i>APOBEC3H</i>        | 2,138 | 2,47E-08    | <i>IL1R2</i>        | 2,770 | 8,73E-05    |
| <i>G0S2</i>            | 2,135 | 0,036467698 | <i>AK5</i>          | 2,756 | 8,64E-10    |
| <i>KRTAP3-1</i>        | 2,090 | 2,25E-08    | <i>PSG1</i>         | 2,731 | 9,80E-05    |
| <i>CD2</i>             | 2,086 | 0,000686289 | <i>PSG9</i>         | 2,727 | 2,69E-06    |
| <i>LCP1</i>            | 2,083 | 0,005880955 | <i>CD70</i>         | 2,724 | 1,07E-12    |
| <i>KITLG</i>           | 2,080 | 3,03E-10    | <i>CSF2</i>         | 2,723 | 2,31E-08    |
| <i>DQX1</i>            | 2,077 | 0,00039358  | <i>TNFSF9</i>       | 2,715 | 1,18E-20    |
| <i>TMEM229B</i>        | 2,060 | 3,87E-09    | <i>ZMAT3</i>        | 2,692 | 1,89E-50    |
| <i>SAA2</i>            | 2,057 | 0,010276926 | <i>RRM2B</i>        | 2,679 | 3,79E-44    |
| <i>BTBD19</i>          | 2,052 | 4,35E-07    | <i>ATG9B</i>        | 2,667 | 0,000689064 |
| <i>HIST1H2BD</i>       | 2,046 | 2,23E-10    | <i>CAPN8</i>        | 2,663 | 3,40E-27    |
| <i>KLHDC7A</i>         | 2,035 | 5,43E-05    | <i>TG</i>           | 2,653 | 1,69E-07    |
| <i>CYFIP2</i>          | 2,033 | 2,41E-13    | <i>FAM49A</i>       | 2,644 | 4,85E-06    |
| <i>FDXR</i>            | 2,032 | 4,11E-47    | <i>CST5</i>         | 2,633 | 1,02E-05    |
| <i>TG</i>              | 2,031 | 0,000153805 | <i>CTGF</i>         | 2,624 | 9,13E-19    |
| <i>PLXNA4</i>          | 2,015 | 0,023215398 | <i>DUSP13</i>       | 2,612 | 0,000240468 |
| <i>CFAP74</i>          | 2,011 | 0,000189949 | <i>LINC01411</i>    | 2,607 | 1,96E-11    |
| <i>IL1R2</i>           | 2,006 | 0,010907805 | <i>LAPTM5</i>       | 2,599 | 1,41E-08    |
| <i>KIAA1211L</i>       | 2,003 | 0,020247049 | <i>BTBD19</i>       | 2,576 | 1,97E-10    |
| <i>EBI3</i>            | 1,983 | 0,003809907 | <i>SAA2-SAA4</i>    | 2,551 | 3,52E-09    |
| <i>BTG2</i>            | 1,975 | 1,59E-21    | <i>MVP</i>          | 2,548 | 4,12E-18    |
| <i>RPS27L</i>          | 1,958 | 1,35E-54    | <i>IGFBP7</i>       | 2,546 | 4,46E-07    |
| <i>RP11-83N9.5</i>     | 1,956 | 0,001199818 | <i>KLHDC7A</i>      | 2,523 | 9,29E-08    |
| <i>CARNS1</i>          | 1,953 | 9,62E-16    | <i>SAA1</i>         | 2,498 | 3,05E-06    |
| <i>GALNT5</i>          | 1,952 | 0,000178909 | <i>C3</i>           | 2,477 | 9,06E-18    |
| <i>ADAMTS7</i>         | 1,951 | 2,95E-16    | <i>TSPAN1</i>       | 2,477 | 9,23E-15    |
| <i>SCN3B</i>           | 1,932 | 0,009251941 | <i>LINC01060</i>    | 2,443 | 1,93E-07    |
| <i>PSG9</i>            | 1,931 | 0,002669505 | <i>VWCE</i>         | 2,418 | 1,99E-11    |
| <i>PRODH</i>           | 1,930 | 0,006737845 | <i>KIAA1324</i>     | 2,414 | 6,27E-15    |
| <i>C3</i>              | 1,905 | 3,59E-10    | <i>AC006262.5</i>   | 2,409 | 7,72E-09    |
| <i>CSF2</i>            | 1,898 | 0,000324905 | <i>DDX47</i>        | 2,401 | 4,12E-07    |
| <i>CTGF</i>            | 1,896 | 3,12E-09    | <i>CYP3A5</i>       | 2,390 | 6,99E-26    |
| <i>AC006262.5</i>      | 1,881 | 2,28E-05    | <i>RP11-529A4.4</i> | 2,385 | 2,66E-07    |
| <i>SERPINB5</i>        | 1,878 | 4,47E-07    | <i>CCL7</i>         | 2,359 | 0,004373056 |
| <i>FILIP1</i>          | 1,875 | 0,006881005 | <i>CLIP4</i>        | 2,347 | 6,08E-05    |
| <i>SMIM10L2A</i>       | 1,853 | 0,000549435 | <i>IL2RG</i>        | 2,321 | 0,016201499 |
| <i>DRAM1</i>           | 1,848 | 5,58E-24    | <i>HIST1H2AC</i>    | 2,319 | 3,26E-12    |
| <i>TSPAN1</i>          | 1,847 | 1,45E-07    | <i>KITLG</i>        | 2,316 | 1,54E-12    |

|                            |       |             |                           |       |                 |
|----------------------------|-------|-------------|---------------------------|-------|-----------------|
| <i>GPD1</i>                | 1,845 | 0,000219269 | <i>KIAA1211L</i>          | 2,307 | 0,0011939<br>68 |
| <i>DKK1</i>                | 1,833 | 2,09E-09    | <i>KRT6A</i>              | 2,300 | 3,28E-09        |
| <i>ANK1</i>                | 1,832 | 3,56E-12    | <i>PLTP</i>               | 2,293 | 5,34E-08        |
| <i>IGFBP7</i>              | 1,826 | 0,001083325 | <i>VSIG1</i>              | 2,285 | 0,0138680<br>47 |
| <i>CST5</i>                | 1,813 | 0,00863789  | <i>G0S2</i>               | 2,284 | 0,0103707<br>52 |
| <i>PSG1</i>                | 1,805 | 0,027965132 | <i>RP5-<br/>1063M23.1</i> | 2,262 | 3,55E-05        |
| <i>SAA2-SAA4</i>           | 1,769 | 0,000178909 | <i>FDXR</i>               | 2,262 | 2,43E-59        |
| <i>LINC01060</i>           | 1,753 | 0,000499286 | <i>RPS27L</i>             | 2,254 | 4,20E-73        |
| <i>LCTL</i>                | 1,750 | 1,62E-05    | <i>CD2</i>                | 2,250 | 4,58E-05        |
| <i>HIST1H2AC</i>           | 1,744 | 6,78E-07    | <i>CYFIP2</i>             | 2,211 | 2,05E-16        |
| <i>NEURL3</i>              | 1,698 | 0,001264901 | <i>MAEL</i>               | 2,203 | 0,0060310<br>82 |
| <i>AC128709.2</i>          | 1,686 | 0,038900659 | <i>HIST1H2BD</i>          | 2,202 | 1,09E-12        |
| <i>PADI1</i>               | 1,680 | 6,10E-16    | <i>NEURL3</i>             | 2,200 | 2,10E-06        |
| <i>SAA1</i>                | 1,671 | 0,00672933  | <i>BTG2</i>               | 2,195 | 5,19E-27        |
| <i>CYP3A5</i>              | 1,666 | 1,52E-12    | <i>PSG7</i>               | 2,186 | 0,0077934<br>39 |
| <i>SHC4</i>                | 1,662 | 0,020027392 | <i>CD82</i>               | 2,178 | 0,0001824<br>74 |
| <i>LINC01411</i>           | 1,644 | 6,06E-05    | <i>ESM1</i>               | 2,156 | 0,0218134<br>15 |
| <i>KIAA1324</i>            | 1,642 | 5,77E-07    | <i>FAM13C</i>             | 2,150 | 2,33E-08        |
| <i>CD22</i>                | 1,637 | 0,002907025 | <i>AOX1</i>               | 2,140 | 4,90E-05        |
| <i>KCNN4</i>               | 1,626 | 0,017653998 | <i>APOBEC3H</i>           | 2,122 | 5,23E-09        |
| <i>NT5DC4</i>              | 1,625 | 0,02336931  | <i>CPA4</i>               | 2,103 | 0,0001950<br>3  |
| <i>HIST1H3H</i>            | 1,621 | 4,86E-08    | <i>DRAM1</i>              | 2,096 | 3,87E-32        |
| <i>UNC13A</i>              | 1,599 | 0,005656629 | <i>LINC00475</i>          | 2,081 | 0,0003256<br>52 |
| <i>FAT1</i>                | 1,590 | 3,77E-17    | <i>GALNT5</i>             | 2,070 | 5,62E-06        |
| <i>C22orf23</i>            | 1,569 | 6,03E-22    | <i>ABAT</i>               | 2,038 | 0,0022462<br>95 |
| <i>bP-21264C1.2</i>        | 1,538 | 0,005951899 | <i>ANK1</i>               | 2,010 | 1,38E-14        |
| <i>LINC01573</i>           | 1,494 | 0,007102901 | <i>ARHGAP9</i>            | 1,999 | 0,0224298<br>75 |
| <i>ACHE</i>                | 1,485 | 0,002446025 | <i>SUGCT</i>              | 1,996 | 2,88E-13        |
| <i>RP11-<br/>1094H24.4</i> | 1,484 | 0,027872854 | <i>KISS1</i>              | 1,991 | 0,0064165<br>24 |
| <i>PHLDA3</i>              | 1,479 | 0,000494057 | <i>LINC01405</i>          | 1,991 | 0,0001050<br>95 |
| <i>HES2</i>                | 1,477 | 3,76E-06    | <i>ABCA1</i>              | 1,988 | 0,0002654<br>32 |
| <i>CMBL</i>                | 1,467 | 2,06E-19    | <i>PLA2G4C</i>            | 1,981 | 5,06E-06        |
| <i>BAX</i>                 | 1,466 | 2,63E-39    | <i>KANK3</i>              | 1,980 | 0,0014767<br>55 |
| <i>PIFO</i>                | 1,462 | 0,009584382 | <i>NABP1</i>              | 1,959 | 1,39E-13        |
| <i>AHNAK2</i>              | 1,451 | 2,56E-09    | <i>AC128709.2</i>         | 1,959 | 0,0066969<br>39 |

|                      |       |             |                      |       |                 |
|----------------------|-------|-------------|----------------------|-------|-----------------|
| <i>FAM13C</i>        | 1,439 | 0,000921017 | <i>FLJ31356</i>      | 1,956 | 0,0341905<br>32 |
| <i>RSPH1</i>         | 1,437 | 0,018723084 | <i>HAVCR2</i>        | 1,953 | 0,0062541<br>64 |
| <i>SESN1</i>         | 1,437 | 6,30E-14    | <i>ITIH5</i>         | 1,951 | 0,0004470<br>57 |
| <i>CD82</i>          | 1,416 | 0,046480306 | <i>RP11-87N24.3</i>  | 1,939 | 0,0174826<br>85 |
| <i>DYRK1B</i>        | 1,413 | 4,84E-10    | <i>HEPHL1</i>        | 1,928 | 2,71E-05        |
| <i>LINC00106</i>     | 1,412 | 0,01574436  | <i>EBI3</i>          | 1,922 | 0,0012783<br>42 |
| <i>HIST1H2BN</i>     | 1,412 | 0,000338612 | <i>SMIM10L2A</i>     | 1,917 | 0,0001587<br>19 |
| <i>ITGB2</i>         | 1,406 | 0,016255473 | <i>HIST1H3H</i>      | 1,915 | 8,17E-12        |
| <i>GJB3</i>          | 1,406 | 0,00037985  | <i>GJB3</i>          | 1,907 | 7,75E-08        |
| <i>ACER2</i>         | 1,392 | 0,003797709 | <i>LCTL</i>          | 1,905 | 5,33E-07        |
| <i>NOS3</i>          | 1,392 | 0,017944974 | <i>CLSTN2</i>        | 1,892 | 1,49E-11        |
| <i>PLTP</i>          | 1,388 | 0,004750381 | <i>TENM2</i>         | 1,890 | 0,0211021<br>72 |
| <i>ABCA1</i>         | 1,384 | 0,034529521 | <i>KRT81</i>         | 1,886 | 0,0001142<br>5  |
| <i>RP11-2C24.4</i>   | 1,380 | 0,013733914 | <i>PIFO</i>          | 1,883 | 0,0002438<br>15 |
| <i>RP5-1198O20.4</i> | 1,377 | 0,027813013 | <i>EPHB1</i>         | 1,882 | 0,0265093<br>3  |
| <i>CYSRT1</i>        | 1,356 | 0,000740621 | <i>ACER2</i>         | 1,874 | 7,62E-06        |
| <i>PLB1</i>          | 1,354 | 0,036342857 | <i>MOB3B</i>         | 1,873 | 0,0082237<br>55 |
| <i>TSPEAR</i>        | 1,346 | 0,030703538 | <i>RP11-618G20.1</i> | 1,857 | 0,0276660<br>77 |
| <i>RP3-395M20.8</i>  | 1,336 | 0,001676397 | <i>ZFHX2</i>         | 1,853 | 0,0041181<br>12 |
| <i>RP11-529A4.4</i>  | 1,322 | 0,023168324 | <i>CMBL</i>          | 1,847 | 4,32E-32        |
| <i>SCARF1</i>        | 1,321 | 0,012421322 | <i>CD24</i>          | 1,843 | 7,75E-08        |
| <i>TP53</i>          | 1,320 | 7,14E-10    | <i>ADRB2</i>         | 1,837 | 0,0047773<br>5  |
| <i>ANKRD24</i>       | 1,318 | 0,00162803  | <i>SLC30A10</i>      | 1,824 | 0,0070745<br>97 |
| <i>SUGCT</i>         | 1,309 | 9,86E-06    | <i>KRT3</i>          | 1,819 | 0,0235316<br>93 |
| <i>YPEL2</i>         | 1,298 | 0,00017249  | <i>TP53</i>          | 1,811 | 7,64E-19        |
| <i>AP006621.8</i>    | 1,296 | 0,032934309 | <i>TMEM229B</i>      | 1,787 | 9,71E-08        |
| <i>SLC5A3</i>        | 1,284 | 1,28E-07    | <i>BIRC3</i>         | 1,779 | 3,61E-08        |
| <i>RP11-231C14.4</i> | 1,279 | 0,024694829 | <i>ADAMTS7</i>       | 1,773 | 1,05E-14        |
| <i>MYL5</i>          | 1,277 | 0,00010232  | <i>SLC6A12</i>       | 1,763 | 0,0092490<br>02 |
| <i>SMG1P6</i>        | 1,275 | 0,029807656 | <i>TMEM40</i>        | 1,748 | 0,0011003<br>89 |
| <i>DCUN1D3</i>       | 1,252 | 7,03E-05    | <i>ANKRD34A</i>      | 1,747 | 0,0002853<br>06 |
| <i>CLSTN2</i>        | 1,249 | 3,73E-05    | <i>CARNS1</i>        | 1,720 | 1,42E-13        |
| <i>MICALL1</i>       | 1,245 | 5,79E-28    | <i>CCL2</i>          | 1,698 | 2,23E-06        |

|                      |       |             |                       |       |                 |
|----------------------|-------|-------------|-----------------------|-------|-----------------|
| <i>ASTN2</i>         | 1,243 | 1,59E-12    | <i>PIK3IP1</i>        | 1,695 | 0,0029140<br>97 |
| <i>LINC01405</i>     | 1,241 | 0,040502938 | <i>RP11-1094H24.4</i> | 1,694 | 0,0019352<br>14 |
| <i>SLFN5</i>         | 1,234 | 2,45E-07    | <i>PLB1</i>           | 1,693 | 0,0021989<br>06 |
| <i>TMC4</i>          | 1,229 | 0,041489715 | <i>ANKRD2</i>         | 1,682 | 0,0102122<br>45 |
| <i>LOXL1</i>         | 1,228 | 5,02E-06    | <i>NT5DC4</i>         | 1,681 | 0,0061411<br>25 |
| <i>FUCA1</i>         | 1,220 | 6,67E-14    | <i>PADI1</i>          | 1,667 | 4,82E-16        |
| <i>CATSPERG</i>      | 1,217 | 0,011386024 | <i>FAT1</i>           | 1,660 | 4,44E-19        |
| <i>ORAI3</i>         | 1,214 | 9,45E-06    | <i>ACHE</i>           | 1,658 | 0,0001612<br>77 |
| <i>MXD4</i>          | 1,197 | 1,72E-12    | <i>KCNN4</i>          | 1,655 | 0,0079440<br>22 |
| <i>PLA2G4C</i>       | 1,195 | 0,01840839  | <i>HSPB8</i>          | 1,651 | 0,0015098<br>76 |
| <i>NTF4</i>          | 1,195 | 0,004232547 | <i>AHNAK2</i>         | 1,650 | 2,32E-12        |
| <i>PTPRU</i>         | 1,187 | 1,05E-14    | <i>SESN1</i>          | 1,650 | 6,61E-19        |
| <i>NABP1</i>         | 1,184 | 4,57E-05    | <i>TGFB2</i>          | 1,650 | 0,0008089<br>11 |
| <i>HEPHL1</i>        | 1,177 | 0,034207909 | <i>HIST1H2AI</i>      | 1,650 | 0,0385707<br>05 |
| <i>KRT6A</i>         | 1,176 | 0,012389288 | <i>CYSRT1</i>         | 1,641 | 8,67E-06        |
| <i>ABHD14A-ACY1</i>  | 1,164 | 0,042955266 | <i>RP11-407N17.3</i>  | 1,632 | 0,0040880<br>68 |
| <i>TMEM150A</i>      | 1,159 | 5,11E-09    | <i>HES2</i>           | 1,624 | 1,08E-07        |
| <i>PLK3</i>          | 1,154 | 1,26E-15    | <i>HIST1H4I</i>       | 1,602 | 6,30E-06        |
| <i>TIMP3</i>         | 1,146 | 5,32E-08    | <i>C22orf23</i>       | 1,601 | 5,70E-24        |
| <i>PRDM1</i>         | 1,132 | 1,93E-05    | <i>SCARF1</i>         | 1,598 | 0,0006069<br>32 |
| <i>RP5-1086K13.1</i> | 1,115 | 0,038580231 | <i>CTD-3074O7.11</i>  | 1,598 | 0,0044238<br>43 |
| <i>FAM212B</i>       | 1,113 | 4,56E-10    | <i>AFF3</i>           | 1,596 | 0,0135869<br>91 |
| <i>GM2A</i>          | 1,109 | 1,71E-06    | <i>ALPK2</i>          | 1,595 | 0,0186381<br>61 |
| <i>DDB2</i>          | 1,097 | 8,81E-13    | <i>WNT9A</i>          | 1,587 | 3,74E-05        |
| <i>TIGAR</i>         | 1,089 | 1,41E-08    | <i>ARHGAP30</i>       | 1,586 | 0,0330220<br>05 |
| <i>LOXL4</i>         | 1,088 | 1,44E-07    | <i>TIGAR</i>          | 1,581 | 2,04E-18        |
| <i>RP11-513I15.6</i> | 1,087 | 0,0017101   | <i>CDH13</i>          | 1,567 | 8,76E-43        |
| <i>GAS7</i>          | 1,083 | 0,002830641 | <i>NT5E</i>           | 1,563 | 0,0099497<br>86 |
| <i>APOE</i>          | 1,080 | 8,33E-06    | <i>TMC4</i>           | 1,560 | 0,0020931<br>91 |
| <i>TRPV4</i>         | 1,078 | 0,000660387 | <i>AP3B2</i>          | 1,558 | 0,0148358<br>08 |
| <i>SULF2</i>         | 1,075 | 4,65E-06    | <i>RP3-395M20.8</i>   | 1,557 | 3,28E-05        |
| <i>PLCXD2</i>        | 1,073 | 0,001721963 | <i>PRDM1</i>          | 1,554 | 3,37E-10        |
| <i>XDH</i>           | 1,072 | 0,034047129 | <i>GM2A</i>           | 1,543 | 1,19E-12        |



|                  |       |             |                      |       |                 |
|------------------|-------|-------------|----------------------|-------|-----------------|
| <i>HIST2H2BE</i> | 1,072 | 5,49E-05    | <i>FAM20C</i>        | 1,536 | 0,0374829<br>32 |
| <i>CDH13</i>     | 1,071 | 1,66E-19    | <i>TMEM150A</i>      | 1,530 | 3,21E-16        |
| <i>PRRG2</i>     | 1,056 | 0,030148551 | <i>PDCD4-AS1</i>     | 1,519 | 0,0169959<br>78 |
| <i>PORCN</i>     | 1,047 | 3,24E-06    | <i>ANXA8L1</i>       | 1,517 | 0,0264097<br>84 |
| <i>RLBP1</i>     | 1,047 | 0,02633084  | <i>CACNA2D3</i>      | 1,515 | 0,0229565<br>34 |
| <i>SYTL1</i>     | 1,036 | 6,82E-12    | <i>NOS3</i>          | 1,515 | 0,0040419<br>1  |
| <i>NEAT1</i>     | 1,034 | 0,039643784 | <i>SLFN5</i>         | 1,513 | 3,08E-11        |
| <i>C22orf29</i>  | 1,028 | 0,033123544 | <i>TTC29</i>         | 1,512 | 0,0176726<br>56 |
| <i>PARD6G</i>    | 1,021 | 2,36E-06    | <i>ASB2</i>          | 1,504 | 0,0060903<br>55 |
| <i>CCL2</i>      | 1,016 | 0,02185244  | <i>NTF4</i>          | 1,503 | 3,29E-05        |
| <i>ITGB4</i>     | 1,015 | 9,66E-05    | <i>AKAP12</i>        | 1,503 | 0,0486608<br>18 |
| <i>GADD45A</i>   | 1,010 | 5,62E-10    | <i>PHLDA3</i>        | 1,493 | 0,0002278<br>59 |
| <i>EME2</i>      | 1,004 | 4,31E-06    | <i>XDH</i>           | 1,491 | 0,0002279<br>3  |
| <i>RPL23AP82</i> | 1,003 | 9,40E-14    | <i>EDN1</i>          | 1,491 | 6,29E-08        |
| <i>PGPEP1</i>    | 1,003 | 7,53E-25    | <i>SHC4</i>          | 1,490 | 0,0343853<br>63 |
| <i>IGDCC4</i>    | 1,003 | 0,000856945 | <i>ASTN2</i>         | 1,484 | 1,93E-18        |
| <i>HIST1H2AG</i> | 0,998 | 0,034696345 | <i>URGCP-MRPS24</i>  | 1,484 | 0,0002017<br>84 |
| <i>PAPL</i>      | 0,996 | 0,005689613 | <i>FUCA1</i>         | 1,482 | 3,98E-21        |
| <i>SPTBN5</i>    | 0,990 | 3,77E-07    | <i>DOCK8</i>         | 1,473 | 3,22E-06        |
| <i>RHOD</i>      | 0,990 | 1,04E-05    | <i>PORCN</i>         | 1,471 | 2,19E-12        |
| <i>PTPRE</i>     | 0,989 | 2,29E-06    | <i>ZNF793</i>        | 1,468 | 0,0456030<br>87 |
| <i>SPNS2</i>     | 0,986 | 0,000173236 | <i>PAPL</i>          | 1,466 | 2,79E-06        |
| <i>LCAT</i>      | 0,981 | 4,87E-05    | <i>CD22</i>          | 1,450 | 0,0052260<br>89 |
| <i>CSMD2</i>     | 0,980 | 0,011688246 | <i>GADD45A</i>       | 1,444 | 7,07E-21        |
| <i>ZNF425</i>    | 0,971 | 0,020145296 | <i>SERPINE1</i>      | 1,438 | 0,0068979<br>8  |
| <i>BBC3</i>      | 0,969 | 1,01E-07    | <i>ITGB2</i>         | 1,434 | 0,0070291<br>52 |
| <i>NPAS2</i>     | 0,955 | 0,024679561 | <i>IL16</i>          | 1,432 | 0,0318452<br>11 |
| <i>SESN2</i>     | 0,955 | 7,01E-06    | <i>AC006369.2</i>    | 1,431 | 0,0343991<br>57 |
| <i>HLA-DQB1</i>  | 0,952 | 0,010519835 | <i>ZNF554</i>        | 1,429 | 7,67E-07        |
| <i>CD163L1</i>   | 0,943 | 0,000219269 | <i>CST4</i>          | 1,428 | 0,0485635<br>83 |
| <i>KCTD21</i>    | 0,943 | 0,000635933 | <i>GAMT</i>          | 1,423 | 0,0249243<br>34 |
| <i>DOCK8</i>     | 0,942 | 0,011876705 | <i>RP11-361L15.4</i> | 1,418 | 0,0475652<br>34 |

|                    |       |             |                           |       |                 |
|--------------------|-------|-------------|---------------------------|-------|-----------------|
| <i>SEMA3B</i>      | 0,941 | 5,66E-05    | <i>ITGB8</i>              | 1,413 | 4,80E-07        |
| <i>C15orf52</i>    | 0,940 | 2,68E-18    | <i>CD163L1</i>            | 1,412 | 7,80E-10        |
| <i>NLRP1</i>       | 0,937 | 1,17E-06    | <i>TINCR</i>              | 1,409 | 0,0145190<br>15 |
| <i>ITGA3</i>       | 0,935 | 8,83E-24    | <i>SQSTM1</i>             | 1,405 | 2,31E-15        |
| <i>C1QTNF1-AS1</i> | 0,934 | 0,000669094 | <i>PHYHIP</i>             | 1,401 | 0,0046580<br>38 |
| <i>MXRA8</i>       | 0,931 | 0,003010938 | <i>DYRK1B</i>             | 1,388 | 2,88E-10        |
| <i>MYH15</i>       | 0,923 | 0,002309071 | <i>MICALL1</i>            | 1,388 | 1,11E-35        |
| <i>S100A2</i>      | 0,922 | 0,000331526 | <i>DRAXIN</i>             | 1,384 | 0,0010601<br>15 |
| <i>RGS16</i>       | 0,921 | 4,22E-06    | <i>ATP8A2</i>             | 1,381 | 0,0334567<br>82 |
| <i>FCGBP</i>       | 0,915 | 0,002693233 | <i>PPP1R1C</i>            | 1,381 | 0,0223344<br>39 |
| <i>CDC42EP3</i>    | 0,912 | 9,82E-05    | <i>MTUS2</i>              | 1,378 | 0,0356922<br>25 |
| <i>TRANK1</i>      | 0,912 | 6,85E-06    | <i>WNT7A</i>              | 1,374 | 0,0014088<br>91 |
| <i>HIST3H2A</i>    | 0,908 | 0,000426478 | <i>GATM</i>               | 1,366 | 0,0215288<br>92 |
| <i>PHPT1</i>       | 0,908 | 6,36E-05    | <i>HPGD</i>               | 1,361 | 1,11E-07        |
| <i>CTSB</i>        | 0,905 | 2,48E-08    | <i>CSMD2</i>              | 1,354 | 7,36E-05        |
| <i>CDC42BPG</i>    | 0,904 | 0,000372505 | <i>CNTNAP3</i>            | 1,351 | 0,0278417<br>12 |
| <i>S100A3</i>      | 0,901 | 0,017027757 | <i>AATBC</i>              | 1,341 | 0,0040419<br>1  |
| <i>ZNF469</i>      | 0,900 | 0,033022532 | <i>RP11-<br/>299G20.2</i> | 1,341 | 0,0233234<br>69 |
| <i>SQSTM1</i>      | 0,900 | 2,36E-06    | <i>ZNF658</i>             | 1,340 | 0,0001660<br>36 |
| <i>KRT86</i>       | 0,897 | 0,012355239 | <i>DDX60L</i>             | 1,331 | 5,71E-06        |
| <i>AEN</i>         | 0,896 | 1,36E-08    | <i>MYL5</i>               | 1,330 | 1,35E-05        |
| <i>RAB3B</i>       | 0,891 | 1,49E-05    | <i>KRT23</i>              | 1,329 | 0,0299401<br>34 |
| <i>CCND1</i>       | 0,884 | 0,00020243  | <i>NPAS2</i>              | 1,323 | 0,0002083<br>37 |
| <i>DCP1B</i>       | 0,879 | 3,29E-13    | <i>MT2A</i>               | 1,316 | 3,68E-07        |
| <i>EPS8L2</i>      | 0,876 | 7,86E-05    | <i>PMAIP1</i>             | 1,316 | 6,72E-18        |
| <i>MT1X</i>        | 0,876 | 0,031194271 | <i>FLJ22447</i>           | 1,312 | 0,0005771<br>63 |
| <i>BBS12</i>       | 0,871 | 0,00186278  | <i>IRAK2</i>              | 1,311 | 0,0213346<br>14 |
| <i>SLC12A4</i>     | 0,866 | 2,98E-07    | <i>IL7R</i>               | 1,311 | 0,0412170<br>82 |
| <i>MT2A</i>        | 0,866 | 0,003296809 | <i>PTPRE</i>              | 1,310 | 3,08E-11        |
| <i>PADI3</i>       | 0,863 | 0,000200922 | <i>SOCS2</i>              | 1,306 | 1,28E-08        |
| <i>FAM210B</i>     | 0,862 | 1,10E-06    | <i>CNTNAP3B</i>           | 1,306 | 0,0334442<br>62 |
| <i>DEPTOR</i>      | 0,862 | 0,036842853 | <i>TM4SF19</i>            | 1,303 | 0,0044025<br>53 |
| <i>MMP14</i>       | 0,860 | 2,21E-10    | <i>BAX</i>                | 1,301 | 1,76E-31        |
| <i>EDN1</i>        | 0,859 | 0,008486943 | <i>FMN1</i>               | 1,293 | 2,00E-05        |

|                           |       |             |                    |       |                 |
|---------------------------|-------|-------------|--------------------|-------|-----------------|
| <i>FBXO2</i>              | 0,859 | 0,011308263 | <i>LOXL1</i>       | 1,290 | 5,31E-07        |
| <i>PLXNB3</i>             | 0,855 | 0,001940657 | <i>CTSB</i>        | 1,284 | 7,99E-17        |
| <i>ASCC3</i>              | 0,855 | 3,25E-06    | <i>MT1E</i>        | 1,281 | 4,31E-08        |
| <i>SLC35F6</i>            | 0,855 | 0,022272032 | <i>HIST1H2BK</i>   | 1,277 | 0,0278182<br>14 |
| <i>KCTD11</i>             | 0,854 | 2,67E-07    | <i>TIMP3</i>       | 1,275 | 3,83E-10        |
| <i>ANKRA2</i>             | 0,847 | 7,44E-07    | <i>SLC52A1</i>     | 1,274 | 0,0019986<br>99 |
| <i>ERC2</i>               | 0,847 | 0,025865121 | <i>HIST1H2AG</i>   | 1,272 | 0,0013925<br>52 |
| <i>PLEKHG1</i>            | 0,844 | 0,001358275 | <i>AC009237.8</i>  | 1,269 | 0,0198761<br>77 |
| <i>TMEM86A</i>            | 0,841 | 0,015123769 | <i>CAV1</i>        | 1,266 | 9,45E-09        |
| <i>ELFN2_1</i>            | 0,838 | 0,036342857 | <i>C1QTNF1-AS1</i> | 1,266 | 1,45E-07        |
| <i>TRIM29</i>             | 0,835 | 0,022137858 | <i>RSPH1</i>       | 1,264 | 0,0198761<br>77 |
| <i>ALOX12B</i>            | 0,835 | 0,000398764 | <i>GULP1</i>       | 1,259 | 2,74E-11        |
| <i>ZNF556</i>             | 0,831 | 0,001817569 | <i>NLRP1</i>       | 1,259 | 3,96E-12        |
| <i>LRP1</i>               | 0,827 | 0,002869293 | <i>GAS7</i>        | 1,254 | 0,0001788<br>22 |
| <i>CACNG8</i>             | 0,814 | 0,001355353 | <i>DDB2</i>        | 1,251 | 2,84E-17        |
| <i>TM7SF2</i>             | 0,811 | 0,022140802 | <i>TNFRSF9</i>     | 1,250 | 0,0072126<br>15 |
| <i>THSD4</i>              | 0,810 | 4,62E-06    | <i>PTPRU</i>       | 1,246 | 8,98E-17        |
| <i>ZNF554</i>             | 0,809 | 0,024097063 | <i>PLK3</i>        | 1,242 | 6,61E-19        |
| <i>FMN1</i>               | 0,808 | 0,025010358 | <i>SNAI2</i>       | 1,238 | 0,0002857<br>5  |
| <i>CENPBD1</i>            | 0,806 | 0,046380413 | <i>ZNF497</i>      | 1,231 | 0,0134302<br>04 |
| <i>CTD-<br/>2267D19.3</i> | 0,805 | 4,41E-05    | <i>KRT86</i>       | 1,231 | 0,0001102<br>1  |
| <i>RP11-380J14.1</i>      | 0,803 | 0,006949856 | <i>SERPINA1</i>    | 1,229 | 1,59E-06        |
| <i>ANKRD1</i>             | 0,787 | 0,000157212 | <i>SLC44A5</i>     | 1,228 | 0,0003717<br>35 |
| <i>LAMA3</i>              | 0,785 | 0,043400516 | <i>LINC01573</i>   | 1,228 | 0,0119043<br>18 |
| <i>MIR22HG</i>            | 0,784 | 0,003509934 | <i>S100A2</i>      | 1,225 | 2,28E-07        |
| <i>SOCS2</i>              | 0,780 | 0,004234742 | <i>MYH15</i>       | 1,213 | 8,72E-06        |
| <i>PLXNB2</i>             | 0,778 | 7,60E-11    | <i>RNF144B</i>     | 1,213 | 0,0012107<br>67 |
| <i>XPC</i>                | 0,772 | 6,82E-12    | <i>FAM210B</i>     | 1,213 | 2,88E-13        |
| <i>CCND2</i>              | 0,770 | 1,47E-05    | <i>THNSL1</i>      | 1,213 | 0,0040880<br>68 |
| <i>DISP2</i>              | 0,770 | 2,92E-06    | <i>NLRP3</i>       | 1,208 | 0,0001613<br>44 |
| <i>CACNA2D4</i>           | 0,768 | 0,013248598 | <i>PTPRZ1</i>      | 1,207 | 0,0434332<br>6  |
| <i>SLC27A1</i>            | 0,767 | 0,019432103 | <i>TRANK1</i>      | 1,205 | 3,44E-10        |
| <i>HGSNAT</i>             | 0,767 | 0,000295421 | <i>SPTBN5</i>      | 1,203 | 3,00E-11        |
| <i>SLC7A7</i>             | 0,765 | 0,033851608 | <i>MXD4</i>        | 1,201 | 3,55E-13        |
| <i>IDUA</i>               | 0,764 | 0,007755402 | <i>HIST2H2BE</i>   | 1,200 | 1,26E-06        |

|                 |       |             |                      |       |                 |
|-----------------|-------|-------------|----------------------|-------|-----------------|
| <i>DDX60L</i>   | 0,763 | 0,043400516 | <i>RNF128</i>        | 1,196 | 0,0212101<br>62 |
| <i>ATF3</i>     | 0,763 | 0,002725988 | <i>CTD-3088G3.8</i>  | 1,195 | 0,0436594<br>79 |
| <i>KSR2</i>     | 0,758 | 0,006897293 | <i>SDCBP2</i>        | 1,192 | 0,0018982<br>89 |
| <i>CCNE1</i>    | 0,750 | 4,87E-08    | <i>APOE</i>          | 1,185 | 2,06E-07        |
| <i>LACC1</i>    | 0,746 | 1,90E-05    | <i>TM4SF1</i>        | 1,183 | 0,0002654<br>32 |
| <i>PIDD1</i>    | 0,746 | 0,014527953 | <i>PLAT</i>          | 1,182 | 0,0238388<br>07 |
| <i>RINL</i>     | 0,741 | 0,002093119 | <i>TRAF1</i>         | 1,180 | 2,55E-05        |
| <i>ARVCF</i>    | 0,740 | 0,018145963 | <i>GPD1</i>          | 1,180 | 0,0174892<br>45 |
| <i>BCL2L1</i>   | 0,736 | 8,74E-09    | <i>ABHD15</i>        | 1,179 | 0,0420144<br>36 |
| <i>UFSP1</i>    | 0,736 | 0,001230776 | <i>ALDH1A3</i>       | 1,177 | 0,0450175<br>47 |
| <i>GULP1</i>    | 0,736 | 0,000614096 | <i>YPEL2</i>         | 1,173 | 0,0004636<br>04 |
| <i>TEP1</i>     | 0,734 | 1,70E-07    | <i>CEP170P1</i>      | 1,171 | 0,0135869<br>91 |
| <i>KRT8</i>     | 0,733 | 9,98E-05    | <i>TSC22D1</i>       | 1,170 | 1,76E-16        |
| <i>PLEC</i>     | 0,733 | 0,010594997 | <i>FAS</i>           | 1,166 | 3,09E-15        |
| <i>SERPINA1</i> | 0,729 | 0,017729875 | <i>SERPINE2</i>      | 1,165 | 5,56E-18        |
| <i>OSBPL3</i>   | 0,725 | 1,65E-08    | <i>RHOD</i>          | 1,159 | 4,69E-08        |
| <i>ZNF79</i>    | 0,725 | 0,011207644 | <i>KCNJ4</i>         | 1,158 | 0,0034715<br>52 |
| <i>TRNP1</i>    | 0,724 | 9,41E-10    | <i>RP11-513I15.6</i> | 1,153 | 0,0003616<br>69 |
| <i>PLK2</i>     | 0,721 | 1,31E-07    | <i>ZNF20</i>         | 1,145 | 0,0226618<br>14 |
| <i>FEZ1</i>     | 0,720 | 0,012485416 | <i>SULF2</i>         | 1,141 | 4,46E-07        |
| <i>MT1E</i>     | 0,720 | 0,009613991 | <i>ORAI3</i>         | 1,135 | 2,11E-05        |
| <i>PLCD3</i>    | 0,720 | 3,28E-12    | <i>ANKRD24</i>       | 1,135 | 0,0041187<br>26 |
| <i>SLC48A1</i>  | 0,720 | 0,001207203 | <i>RPL23AP82</i>     | 1,133 | 5,12E-18        |
| <i>SUSD6</i>    | 0,718 | 4,32E-07    | <i>RAB3B</i>         | 1,132 | 4,71E-09        |
| <i>NINJ1</i>    | 0,716 | 9,72E-05    | <i>HGSNAT</i>        | 1,127 | 2,23E-09        |
| <i>TP53TG1</i>  | 0,713 | 0,037710452 | <i>SLC16A4</i>       | 1,124 | 0,0311892<br>58 |
| <i>RIN1</i>     | 0,712 | 0,004521785 | <i>PLAU</i>          | 1,117 | 1,36E-07        |
| <i>CALCOCO1</i> | 0,710 | 2,87E-06    | <i>ZNF425</i>        | 1,111 | 0,0013242<br>38 |
| <i>SGK223</i>   | 0,708 | 1,86E-06    | <i>RLBP1</i>         | 1,103 | 0,0077644<br>96 |
| <i>FBXO22</i>   | 0,703 | 6,30E-11    | <i>RP11-46A10.5</i>  | 1,103 | 0,0481957<br>28 |
| <i>MTFR1L</i>   | 0,701 | 6,23E-06    | <i>PLEKHG1</i>       | 1,100 | 2,65E-06        |
| <i>C5orf66</i>  | 0,691 | 0,006082268 | <i>ITGB4</i>         | 1,097 | 9,54E-06        |
| <i>DOCK9</i>    | 0,688 | 0,022768151 | <i>SGK1</i>          | 1,096 | 0,0318452<br>11 |
| <i>ZNF446</i>   | 0,687 | 0,010416389 | <i>ASCC3</i>         | 1,095 | 2,83E-10        |

|                 |       |             |                      |       |             |
|-----------------|-------|-------------|----------------------|-------|-------------|
| <i>APLP1</i>    | 0,686 | 0,005695669 | <i>SLC26A4</i>       | 1,091 | 0,005366908 |
| <i>RNF19A</i>   | 0,681 | 0,035674537 | <i>ETS1</i>          | 1,090 | 3,63E-08    |
| <i>TNFRSF14</i> | 0,680 | 0,003492711 | <i>ANKRA2</i>        | 1,088 | 1,90E-11    |
| <i>ACTN1</i>    | 0,680 | 8,66E-10    | <i>FEZ1</i>          | 1,087 | 2,06E-05    |
| <i>PEAR1</i>    | 0,678 | 0,002003462 | <i>KRT15</i>         | 1,085 | 0,004049652 |
| <i>ADAM19</i>   | 0,675 | 9,51E-06    | <i>PTAFR</i>         | 1,083 | 0,017606881 |
| <i>SHC1</i>     | 0,673 | 1,33E-06    | <i>TRIM29</i>        | 1,083 | 0,000606932 |
| <i>PSTPIP2</i>  | 0,670 | 5,59E-06    | <i>RP11-136O12.2</i> | 1,081 | 0,007237088 |
| <i>TSC22D1</i>  | 0,666 | 1,89E-05    | <i>SLC26A4-AS1</i>   | 1,080 | 0,008376074 |
| <i>ZFP36L1</i>  | 0,663 | 0,023849625 | <i>PARD6G</i>        | 1,080 | 3,15E-08    |
| <i>MYEOV</i>    | 0,660 | 0,025979604 | <i>DCBLD2</i>        | 1,079 | 0,046306222 |
| <i>WNT5A</i>    | 0,658 | 0,000423992 | <i>PLK2</i>          | 1,079 | 4,86E-17    |
| <i>FAS</i>      | 0,656 | 7,35E-05    | <i>AC011747.6</i>    | 1,079 | 0,022463334 |
| <i>NADSYN1</i>  | 0,653 | 0,012787949 | <i>PLEK</i>          | 1,073 | 0,006664258 |
| <i>POLD4</i>    | 0,651 | 0,007049374 | <i>FAM134B</i>       | 1,072 | 0,011784098 |
| <i>PRR5</i>     | 0,646 | 0,048354823 | <i>CPEB2</i>         | 1,072 | 0,012447201 |
| <i>SLC20A1</i>  | 0,644 | 3,74E-05    | <i>PTP4A1</i>        | 1,070 | 1,11E-10    |
| <i>APOBEC3C</i> | 0,642 | 5,02E-06    | <i>TRPM6</i>         | 1,070 | 0,023809373 |
| <i>PRKCZ</i>    | 0,640 | 0,000376606 | <i>MIR22HG</i>       | 1,068 | 4,81E-06    |
| <i>CST7</i>     | 0,640 | 0,001351478 | <i>PRAP1</i>         | 1,067 | 0,000298615 |
| <i>COL7A1</i>   | 0,640 | 0,02799192  | <i>GCK</i>           | 1,067 | 0,004926908 |
| <i>ADAM23</i>   | 0,639 | 0,005601723 | <i>GRIN2C</i>        | 1,065 | 0,02610832  |
| <i>PTK6</i>     | 0,638 | 0,025351522 | <i>TNFRSF11B</i>     | 1,063 | 0,007346146 |
| <i>ANXA4</i>    | 0,635 | 5,32E-06    | <i>TMEM255B</i>      | 1,063 | 0,014835808 |
| <i>PLXNC1</i>   | 0,633 | 0,028038916 | <i>ABLIM2</i>        | 1,061 | 0,006032026 |
| <i>STEAP3</i>   | 0,633 | 0,008754552 | <i>RP11-2C24.4</i>   | 1,061 | 0,036669463 |
| <i>RHOQ</i>     | 0,631 | 0,012744464 | <i>LOXL4</i>         | 1,060 | 1,60E-07    |
| <i>PTP4A1</i>   | 0,627 | 0,00082935  | <i>CCND1</i>         | 1,059 | 1,98E-06    |
| <i>MALAT1_1</i> | 0,626 | 0,000850633 | <i>SRGAP3</i>        | 1,055 | 0,008446952 |
| <i>MR1</i>      | 0,623 | 0,012000221 | <i>TRIAP1</i>        | 1,051 | 4,72E-08    |
| <i>IP6K2</i>    | 0,619 | 0,00011292  | <i>PLXNB3</i>        | 1,046 | 3,12E-05    |
| <i>IRGQ</i>     | 0,615 | 0,029815867 | <i>CPM</i>           | 1,045 | 0,041021484 |

|                  |        |             |                     |       |                 |
|------------------|--------|-------------|---------------------|-------|-----------------|
| <i>CLN8</i>      | 0,611  | 0,000639627 | <i>SYTL1</i>        | 1,045 | 8,62E-13        |
| <i>SARM1</i>     | 0,610  | 0,021342611 | <i>PLCXD2</i>       | 1,045 | 0,0006069<br>32 |
| <i>KRT5</i>      | 0,609  | 6,88E-06    | <i>RDH5</i>         | 1,034 | 0,0197484<br>81 |
| <i>BIK</i>       | 0,606  | 0,00043297  | <i>TP53TG1</i>      | 1,031 | 0,0001889<br>72 |
| <i>KLK6</i>      | 0,605  | 0,023415146 | <i>CACNA2D4</i>     | 1,029 | 0,0001376<br>6  |
| <i>FHL2</i>      | 0,604  | 0,000475272 | <i>DCP1B</i>        | 1,029 | 7,35E-19        |
| <i>DLG1</i>      | 0,603  | 0,005765626 | <i>TAGLN</i>        | 1,029 | 0,0115788<br>58 |
| <i>LAMB3</i>     | 0,601  | 0,011370757 | <i>ATP8B1</i>       | 1,027 | 0,0422890<br>38 |
| <i>TNFRSF10B</i> | 0,599  | 7,09E-11    | <i>ADAM23</i>       | 1,022 | 2,20E-07        |
| <i>LAMC2</i>     | 0,598  | 0,022064317 | <i>FAM212B</i>      | 1,020 | 1,79E-09        |
| <i>TBC1D2</i>    | 0,598  | 0,022421921 | <i>IGDCC4</i>       | 1,016 | 0,0003543<br>96 |
| <i>ZNF219</i>    | 0,595  | 0,01000707  | <i>RINL</i>         | 1,016 | 1,78E-06        |
| <i>NOL6</i>      | 0,594  | 0,022011645 | <i>PUS3</i>         | 1,013 | 4,42E-07        |
| <i>SIDT2</i>     | 0,594  | 0,008754552 | <i>SRPX</i>         | 1,008 | 0,0042251<br>58 |
| <i>MYOF</i>      | 0,593  | 2,77E-06    | <i>PSTPIP2</i>      | 1,008 | 1,68E-13        |
| <i>GPX1</i>      | 0,592  | 0,001708878 | <i>DTX4</i>         | 1,002 | 0,0088620<br>83 |
| <i>LIF</i>       | 0,590  | 0,001764487 | <i>SESN2</i>        | 1,002 | 7,61E-07        |
| <i>MDFI</i>      | 0,588  | 0,000401533 | <i>CCNE1</i>        | 1,001 | 4,73E-15        |
| <i>DGKA</i>      | 0,588  | 5,44E-07    | <i>C15orf52</i>     | 1,001 | 2,66E-21        |
| <i>FAM102A</i>   | 0,586  | 0,000182831 | <i>BATF2</i>        | 0,996 | 0,0430168<br>68 |
| <i>ZNF470</i>    | 0,585  | 0,000743609 | <i>SLCO1B3</i>      | 0,996 | 0,0489904<br>21 |
| <i>PMEPA1</i>    | 0,583  | 0,000850633 | <i>PYURF</i>        | 0,991 | 4,38E-06        |
| <i>SLC38A7</i>   | 0,582  | 0,001971708 | <i>GAS6-AS2</i>     | 0,988 | 0,0027483<br>43 |
| <i>ARL13B</i>    | -0,581 | 0,015807701 | <i>ATF3</i>         | 0,988 | 1,61E-05        |
| <i>CKLF</i>      | -0,582 | 6,76E-05    | <i>SLC16A2</i>      | 0,987 | 4,18E-08        |
| <i>H2AFV</i>     | -0,583 | 1,66E-05    | <i>DEPTOR</i>       | 0,984 | 0,0069252<br>46 |
| <i>TOPBP1</i>    | -0,583 | 7,08E-05    | <i>SLC7A7</i>       | 0,984 | 0,0016658<br>48 |
| <i>DNMT1</i>     | -0,583 | 0,000882714 | <i>RP11-15J10.1</i> | 0,983 | 0,0095580<br>07 |
| <i>SMC1A</i>     | -0,583 | 4,54E-05    | <i>C5orf66</i>      | 0,982 | 8,74E-06        |
| <i>CDCA7</i>     | -0,586 | 3,29E-06    | <i>ARVCF</i>        | 0,982 | 0,0002413<br>41 |
| <i>PDX1</i>      | -0,586 | 0,035478419 | <i>MALAT1_1</i>     | 0,979 | 5,41E-09        |
| <i>SVIP</i>      | -0,587 | 0,000445649 | <i>LACC1</i>        | 0,977 | 1,61E-09        |
| <i>PIM1</i>      | -0,588 | 0,012674126 | <i>BLOC1S2</i>      | 0,975 | 3,11E-09        |
| <i>RNF26</i>     | -0,589 | 1,76E-05    | <i>NR2F1</i>        | 0,973 | 4,58E-08        |
| <i>NASP</i>      | -0,589 | 9,22E-07    | <i>UBR5-AS1</i>     | 0,971 | 0,0051514<br>03 |

|                 |        |             |                           |       |                 |
|-----------------|--------|-------------|---------------------------|-------|-----------------|
| <i>DCLRE1B</i>  | -0,591 | 0,000230955 | <i>ANXA4</i>              | 0,969 | 5,54E-14        |
| <i>FBXL16</i>   | -0,591 | 0,043400516 | <i>CST7</i>               | 0,968 | 5,06E-08        |
| <i>FZD1</i>     | -0,591 | 0,024434838 | <i>PGPEP1</i>             | 0,962 | 2,10E-23        |
| <i>FANCM</i>    | -0,593 | 0,005883516 | <i>DLG1</i>               | 0,961 | 3,38E-07        |
| <i>TCTN2</i>    | -0,594 | 0,011276892 | <i>HHAT</i>               | 0,956 | 0,0003256<br>52 |
| <i>DBF4</i>     | -0,594 | 1,65E-05    | <i>ANKRD1</i>             | 0,951 | 1,07E-06        |
| <i>RTN4RL2</i>  | -0,595 | 0,048075346 | <i>PROS1</i>              | 0,949 | 0,0079261<br>92 |
| <i>PPIH</i>     | -0,596 | 0,000464435 | <i>DLGAP1-AS2</i>         | 0,948 | 0,0217856<br>72 |
| <i>TREX2</i>    | -0,600 | 0,004042169 | <i>LIMA1</i>              | 0,947 | 0,0015182<br>27 |
| <i>HAUS5</i>    | -0,601 | 0,000105643 | <i>C4orf36</i>            | 0,946 | 1,56E-05        |
| <i>EXOSC8</i>   | -0,601 | 4,58E-06    | <i>NEURL2</i>             | 0,942 | 0,0267240<br>13 |
| <i>CEP152</i>   | -0,602 | 0,004348111 | <i>SEMA3B</i>             | 0,940 | 3,12E-05        |
| <i>ASNS</i>     | -0,602 | 0,00218666  | <i>OSBPL3</i>             | 0,933 | 2,87E-14        |
| <i>FN3KRP</i>   | -0,603 | 2,08E-06    | <i>LYPLAL1</i>            | 0,932 | 2,32E-07        |
| <i>WRAP53</i>   | -0,607 | 0,003155957 | <i>SPRED3</i>             | 0,930 | 0,0362564<br>47 |
| <i>CENPL</i>    | -0,609 | 0,002767561 | <i>CCNG1</i>              | 0,928 | 4,64E-10        |
| <i>LRRC20</i>   | -0,611 | 8,32E-05    | <i>SAMD12</i>             | 0,927 | 0,0121150<br>56 |
| <i>MZT1</i>     | -0,612 | 2,80E-05    | <i>MT1X</i>               | 0,926 | 0,0110192<br>25 |
| <i>NCK1-AS1</i> | -0,612 | 0,016410201 | <i>BBC3</i>               | 0,925 | 1,71E-07        |
| <i>CDC7</i>     | -0,613 | 0,003873351 | <i>PIDD1</i>              | 0,925 | 0,0005387<br>73 |
| <i>POLD1</i>    | -0,613 | 5,54E-05    | <i>FAM83H-AS1</i>         | 0,925 | 0,0199326<br>08 |
| <i>UNG</i>      | -0,614 | 3,22E-06    | <i>CH17-360D5.2</i>       | 0,922 | 0,0478782<br>77 |
| <i>DCLRE1A</i>  | -0,615 | 9,51E-06    | <i>ALOX12B</i>            | 0,918 | 2,38E-05        |
| <i>POLA1</i>    | -0,618 | 0,000149538 | <i>IKBIP</i>              | 0,916 | 2,47E-17        |
| <i>TMPO</i>     | -0,618 | 3,29E-07    | <i>PHPT1</i>              | 0,910 | 2,96E-05        |
| <i>CCDC18</i>   | -0,619 | 0,013354996 | <i>TMBIM4_1</i>           | 0,905 | 0,0008426<br>53 |
| <i>WDR24</i>    | -0,623 | 0,015342171 | <i>PADI3</i>              | 0,902 | 4,83E-05        |
| <i>HYLS1</i>    | -0,623 | 0,005374256 | <i>ITGA3</i>              | 0,896 | 2,91E-22        |
| <i>DTYMK</i>    | -0,623 | 0,001377001 | <i>CATSPERG</i>           | 0,895 | 0,0467964<br>17 |
| <i>TRIM36</i>   | -0,623 | 0,022179999 | <i>CTD-<br/>2267D19.3</i> | 0,894 | 1,06E-06        |
| <i>TMEM237</i>  | -0,627 | 8,33E-06    | <i>RP11-<br/>421F16.3</i> | 0,894 | 5,40E-11        |
| <i>SLC1A4</i>   | -0,627 | 0,00973185  | <i>SLC16A6</i>            | 0,892 | 1,56E-06        |
| <i>PCNA</i>     | -0,628 | 1,92E-06    | <i>LCAT</i>               | 0,889 | 0,0001339<br>24 |
| <i>B3GAT1</i>   | -0,631 | 0,001230776 | <i>PABPC3</i>             | 0,887 | 0,0155503<br>26 |
| <i>UBL7-AS1</i> | -0,631 | 0,040260532 | <i>RGS16</i>              | 0,887 | 5,15E-06        |

|                     |        |             |                   |       |             |
|---------------------|--------|-------------|-------------------|-------|-------------|
| <i>CARHSP1</i>      | -0,632 | 0,000389885 | <i>NACAP1</i>     | 0,887 | 0,002122135 |
| <i>GPD2</i>         | -0,633 | 2,32E-05    | <i>MTRNR2L12</i>  | 0,887 | 0,037722861 |
| <i>ACSM3</i>        | -0,633 | 0,026651822 | <i>ABCA3</i>      | 0,886 | 0,023533137 |
| <i>CPNE2</i>        | -0,633 | 0,000712796 | <i>TNFAIP3</i>    | 0,882 | 0,025661595 |
| <i>SCLT1</i>        | -0,633 | 0,000332381 | <i>CCND2</i>      | 0,881 | 1,95E-07    |
| <i>PPDPF</i>        | -0,636 | 0,00079687  | <i>PBLD</i>       | 0,880 | 0,005054979 |
| <i>MEGF9</i>        | -0,639 | 0,020087007 | <i>SDC4</i>       | 0,879 | 0,00061449  |
| <i>TFAP2A</i>       | -0,639 | 0,012367045 | <i>LPCAT2</i>     | 0,879 | 2,83E-07    |
| <i>RPA3</i>         | -0,639 | 1,09E-05    | <i>TRPV4</i>      | 0,878 | 0,003324685 |
| <i>GIN3</i>         | -0,640 | 0,002093119 | <i>FBXO2</i>      | 0,877 | 0,004734152 |
| <i>INCENP</i>       | -0,640 | 1,66E-05    | <i>TM7SF2</i>     | 0,877 | 0,005503886 |
| <i>UBR7</i>         | -0,643 | 9,27E-05    | <i>MMP14</i>      | 0,876 | 2,63E-11    |
| <i>SLF1</i>         | -0,643 | 3,81E-07    | <i>KCTD11</i>     | 0,876 | 5,76E-08    |
| <i>IRF7</i>         | -0,645 | 0,015409504 | <i>SLC35F6</i>    | 0,874 | 0,007289271 |
| <i>FAM72A</i>       | -0,650 | 0,000767648 | <i>MIR222HG</i>   | 0,872 | 0,008622546 |
| <i>TTPA</i>         | -0,653 | 0,024351758 | <i>SP140L</i>     | 0,871 | 0,000958529 |
| <i>CEP57L1</i>      | -0,653 | 0,000110902 | <i>AP000320.7</i> | 0,870 | 0,001172173 |
| <i>PARP2</i>        | -0,655 | 2,02E-05    | <i>PLCL2</i>      | 0,868 | 0,011259561 |
| <i>KPNA2</i>        | -0,656 | 4,95E-06    | <i>WNT5A</i>      | 0,865 | 4,86E-07    |
| <i>NRM</i>          | -0,656 | 6,41E-06    | <i>TRIM13</i>     | 0,865 | 0,00227056  |
| <i>LMO7</i>         | -0,658 | 0,022967544 | <i>MRPS6</i>      | 0,862 | 9,52E-06    |
| <i>RP11-22B23.1</i> | -0,661 | 0,000310442 | <i>UNC5CL</i>     | 0,862 | 0,021361489 |
| <i>RAD21</i>        | -0,662 | 3,09E-05    | <i>SERPINB8</i>   | 0,860 | 0,007387252 |
| <i>SPA17</i>        | -0,663 | 0,00170172  | <i>ZNF561</i>     | 0,855 | 2,10E-08    |
| <i>STMN1</i>        | -0,665 | 8,29E-05    | <i>IFRD1</i>      | 0,855 | 0,000872938 |
| <i>HIRIP3</i>       | -0,669 | 0,000210159 | <i>LIG4</i>       | 0,854 | 0,004306649 |
| <i>YEATS4</i>       | -0,674 | 7,12E-06    | <i>ITGA2</i>      | 0,854 | 1,46E-05    |
| <i>RTTN</i>         | -0,674 | 0,042811257 | <i>GABARAPL1</i>  | 0,851 | 1,74E-10    |
| <i>DOCK11</i>       | -0,674 | 0,040564308 | <i>ZFP36L1</i>    | 0,850 | 0,000816843 |
| <i>SASS6</i>        | -0,677 | 2,20E-05    | <i>FBXO22</i>     | 0,846 | 1,64E-16    |
| <i>TONSL</i>        | -0,678 | 0,002373602 | <i>LAMA3</i>      | 0,844 | 0,013433623 |
| <i>MCM8</i>         | -0,679 | 0,000260238 | <i>TNFRSF14</i>   | 0,844 | 3,93E-05    |



|                 |        |             |                      |       |                 |
|-----------------|--------|-------------|----------------------|-------|-----------------|
| <i>FAM83D</i>   | -0,679 | 1,05E-07    | <i>F8</i>            | 0,843 | 0,0069455<br>99 |
| <i>TIMELESS</i> | -0,680 | 5,38E-05    | <i>RORA</i>          | 0,842 | 0,0089573<br>24 |
| <i>PRADC1</i>   | -0,682 | 0,000245383 | <i>HLA-DQB1</i>      | 0,839 | 0,0159553<br>24 |
| <i>RAD18</i>    | -0,683 | 0,000124524 | <i>MTFR1L</i>        | 0,839 | 1,20E-08        |
| <i>BORA</i>     | -0,683 | 0,000200263 | <i>TMEM117</i>       | 0,838 | 0,0005739<br>95 |
| <i>FOXA2</i>    | -0,684 | 0,041310187 | <i>CHURC1</i>        | 0,834 | 2,65E-06        |
| <i>CHEK2</i>    | -0,689 | 8,82E-07    | <i>ALOX5AP</i>       | 0,834 | 0,0311892<br>58 |
| <i>PHF19</i>    | -0,693 | 5,36E-05    | <i>INAFM2</i>        | 0,828 | 6,17E-05        |
| <i>ECT2</i>     | -0,694 | 0,000740621 | <i>APOBEC3C</i>      | 0,825 | 4,98E-10        |
| <i>BCL2L12</i>  | -0,696 | 0,006802911 | <i>TRNP1</i>         | 0,823 | 3,47E-13        |
| <i>CENPE</i>    | -0,696 | 0,008754552 | <i>GS1-124K5.4</i>   | 0,820 | 0,0243859<br>09 |
| <i>C2orf44</i>  | -0,697 | 0,030691486 | <i>CCDC90B</i>       | 0,820 | 9,29E-08        |
| <i>SAP30</i>    | -0,698 | 6,92E-06    | <i>AEN</i>           | 0,819 | 1,43E-07        |
| <i>DONSON</i>   | -0,698 | 0,005368066 | <i>TCEAL1</i>        | 0,818 | 4,23E-06        |
| <i>CCSAP</i>    | -0,699 | 2,71E-07    | <i>PLXNC1</i>        | 0,818 | 0,0010309<br>3  |
| <i>CCDC77</i>   | -0,701 | 1,29E-06    | <i>DHRS12</i>        | 0,815 | 0,0021779<br>25 |
| <i>SKA2</i>     | -0,703 | 5,57E-06    | <i>BIRC2</i>         | 0,815 | 1,57E-09        |
| <i>WHSC1</i>    | -0,703 | 2,19E-07    | <i>GALNT10</i>       | 0,814 | 0,0306121<br>63 |
| <i>C16orf59</i> | -0,706 | 0,006026328 | <i>CD44</i>          | 0,814 | 7,53E-05        |
| <i>RAD9A</i>    | -0,707 | 2,81E-06    | <i>EME2</i>          | 0,813 | 0,0001451<br>5  |
| <i>DDX11</i>    | -0,707 | 3,46E-09    | <i>ADPRM</i>         | 0,813 | 0,0005908<br>95 |
| <i>POLE</i>     | -0,707 | 3,28E-05    | <i>RP13-463N16.6</i> | 0,812 | 0,0002413<br>41 |
| <i>FAAP24</i>   | -0,708 | 0,002231057 | <i>AC084219.2</i>    | 0,811 | 0,0032204<br>38 |
| <i>HES4</i>     | -0,711 | 0,001419719 | <i>BACH1</i>         | 0,810 | 0,0116351<br>17 |
| <i>CCNE2</i>    | -0,712 | 0,009584382 | <i>RNF19A</i>        | 0,810 | 0,0040112<br>26 |
| <i>LIN54</i>    | -0,712 | 9,45E-06    | <i>MR1</i>           | 0,809 | 0,0001826<br>53 |
| <i>MSH6</i>     | -0,712 | 3,76E-06    | <i>WDR72</i>         | 0,809 | 0,0001321<br>39 |
| <i>BRCA2</i>    | -0,717 | 0,000991958 | <i>CAPS</i>          | 0,806 | 0,0050764<br>24 |
| <i>SAPCD2</i>   | -0,717 | 4,26E-07    | <i>EXT1</i>          | 0,806 | 8,99E-05        |
| <i>ACBD7</i>    | -0,718 | 0,000108261 | <i>SLC12A4</i>       | 0,805 | 1,28E-06        |
| <i>KNSTRN</i>   | -0,719 | 1,41E-08    | <i>CREBRF</i>        | 0,804 | 0,0016873<br>38 |
| <i>RAD51D</i>   | -0,721 | 0,022363606 | <i>TMEM106B</i>      | 0,803 | 1,21E-09        |
| <i>HMGB3</i>    | -0,721 | 0,000102288 | <i>ALS2CL</i>        | 0,802 | 0,0019591<br>04 |

|                            |        |             |                  |       |                 |
|----------------------------|--------|-------------|------------------|-------|-----------------|
| <i>FANCA</i>               | -0,723 | 2,46E-06    | <i>PERP</i>      | 0,801 | 1,71E-08        |
| <i>ARL6IP6</i>             | -0,725 | 2,84E-06    | <i>IDUA</i>      | 0,800 | 0,0018920<br>56 |
| <i>C4orf46</i>             | -0,725 | 3,03E-10    | <i>CERS5</i>     | 0,798 | 3,12E-09        |
| <i>PXMP2</i>               | -0,726 | 6,21E-05    | <i>LINC00941</i> | 0,797 | 0,0010234<br>11 |
| <i>PARPBP</i>              | -0,726 | 3,99E-05    | <i>ARRDC4</i>    | 0,796 | 0,0075570<br>49 |
| <i>MCM3</i>                | -0,728 | 3,29E-06    | <i>TMC7</i>      | 0,789 | 0,0423524<br>11 |
| <i>GSTCD</i>               | -0,728 | 0,047380714 | <i>LYRM5</i>     | 0,788 | 5,24E-10        |
| <i>ARHGAP19-<br/>SLIT1</i> | -0,729 | 0,000301829 | <i>SLC20A1</i>   | 0,788 | 8,40E-08        |
| <i>MMS22L</i>              | -0,729 | 0,001377001 | <i>CYB5R2</i>    | 0,785 | 4,78E-05        |
| <i>NCAPH2</i>              | -0,734 | 0,000282201 | <i>TLR3</i>      | 0,785 | 0,0310963<br>18 |
| <i>DNAJC9</i>              | -0,735 | 0,002920904 | <i>ZNF30</i>     | 0,783 | 0,0003363<br>05 |
| <i>SMC2</i>                | -0,739 | 1,94E-05    | <i>KLF6</i>      | 0,781 | 4,51E-07        |
| <i>CDK2</i>                | -0,740 | 6,12E-10    | <i>FHL2</i>      | 0,780 | 8,65E-07        |
| <i>KDM4D</i>               | -0,740 | 0,024434838 | <i>GBE1</i>      | 0,780 | 4,77E-06        |
| <i>HMGN2</i>               | -0,741 | 0,000687366 | <i>FAM221A</i>   | 0,777 | 0,0022305<br>6  |
| <i>WDR62</i>               | -0,742 | 0,001628999 | <i>MXRA8</i>     | 0,776 | 0,0102473<br>28 |
| <i>LIN9</i>                | -0,745 | 8,08E-09    | <i>FCGBP</i>     | 0,775 | 0,0076323       |
| <i>NUP62</i>               | -0,746 | 0,015377135 | <i>NOP14-AS1</i> | 0,774 | 1,52E-06        |
| <i>MYBL1</i>               | -0,748 | 0,002890636 | <i>FTX</i>       | 0,773 | 0,0009451<br>6  |
| <i>LIG1</i>                | -0,749 | 8,66E-08    | <i>PIGF</i>      | 0,768 | 0,0006583<br>07 |
| <i>CHTF18</i>              | -0,750 | 2,54E-06    | <i>BCL2L1</i>    | 0,766 | 7,67E-10        |
| <i>H2AFZ</i>               | -0,751 | 0,000558777 | <i>IGFL4</i>     | 0,764 | 0,0448131<br>39 |
| <i>MPP2</i>                | -0,754 | 0,004950758 | <i>DOCK9</i>     | 0,762 | 0,0046062<br>4  |
| <i>PROCA1</i>              | -0,754 | 0,035771077 | <i>ZNF83</i>     | 0,760 | 3,66E-05        |
| <i>TMEM107</i>             | -0,754 | 1,05E-05    | <i>IL32</i>      | 0,759 | 0,0483593<br>65 |
| <i>CDC25A</i>              | -0,755 | 5,64E-05    | <i>NADSYN1</i>   | 0,755 | 0,0012430<br>69 |
| <i>OVOS2</i>               | -0,758 | 0,023612823 | <i>MYEOV</i>     | 0,754 | 0,0039152<br>75 |
| <i>GGH</i>                 | -0,758 | 1,17E-05    | <i>TBC1D2</i>    | 0,753 | 0,0008736<br>7  |
| <i>CENPF</i>               | -0,758 | 0,000835349 | <i>SDSL</i>      | 0,751 | 0,0019144<br>76 |
| <i>ATRNL1</i>              | -0,758 | 0,010267399 | <i>EPS8L2</i>    | 0,750 | 0,0006490<br>08 |
| <i>GMNN</i>                | -0,759 | 2,56E-07    | <i>KLK6</i>      | 0,750 | 0,0012345<br>54 |
| <i>DLEU2</i>               | -0,760 | 0,001440848 | <i>SORBS2</i>    | 0,749 | 0,0143205<br>4  |

|                |        |             |                   |       |             |
|----------------|--------|-------------|-------------------|-------|-------------|
| <i>HMGB1</i>   | -0,765 | 2,99E-08    | <i>GLS</i>        | 0,747 | 2,57E-05    |
| <i>C1QL1</i>   | -0,766 | 0,018738036 | <i>PEAR1</i>      | 0,747 | 7,37E-05    |
| <i>CENPJ</i>   | -0,767 | 9,48E-07    | <i>MBNL2</i>      | 0,746 | 9,37E-09    |
| <i>HAT1</i>    | -0,767 | 1,21E-07    | <i>SLC30A1</i>    | 0,743 | 0,011550674 |
| <i>H1FX</i>    | -0,770 | 3,12E-05    | <i>SRSF8</i>      | 0,740 | 6,86E-06    |
| <i>MSH5</i>    | -0,771 | 0,000340593 | <i>MYOF</i>       | 0,740 | 6,48E-10    |
| <i>POLD3</i>   | -0,772 | 7,19E-07    | <i>SLC22A15</i>   | 0,739 | 0,046857967 |
| <i>LRRCC1</i>  | -0,775 | 0,020216201 | <i>CDC42EP3</i>   | 0,739 | 0,001635734 |
| <i>RFC4</i>    | -0,775 | 0,000134944 | <i>ELFN2_1</i>    | 0,739 | 0,044405361 |
| <i>CENPP</i>   | -0,776 | 4,19E-07    | <i>PAOX</i>       | 0,738 | 0,010956452 |
| <i>WEE1</i>    | -0,777 | 3,77E-07    | <i>LAMB3</i>      | 0,737 | 0,000466931 |
| <i>SDHAF2</i>  | -0,779 | 0,003549174 | <i>XPC</i>        | 0,734 | 2,31E-11    |
| <i>NEMP1</i>   | -0,779 | 2,70E-08    | <i>ZNF561-AS1</i> | 0,734 | 0,026277108 |
| <i>DDX12P</i>  | -0,780 | 3,28E-05    | <i>SLC38A6</i>    | 0,732 | 2,35E-06    |
| <i>AUNIP</i>   | -0,782 | 0,000175826 | <i>POLD4</i>      | 0,731 | 0,000550338 |
| <i>GIN54</i>   | -0,782 | 0,003181053 | <i>CASS4</i>      | 0,731 | 0,047878277 |
| <i>MXD3</i>    | -0,785 | 2,23E-10    | <i>ICA1</i>       | 0,731 | 0,011784098 |
| <i>HAUS8</i>   | -0,785 | 0,000242045 | <i>AP1S2</i>      | 0,726 | 7,07E-08    |
| <i>CNTRL</i>   | -0,787 | 0,00069107  | <i>ZNF284</i>     | 0,725 | 0,009300942 |
| <i>ENTPD2</i>  | -0,788 | 0,00994185  | <i>TARSL2</i>     | 0,725 | 1,03E-08    |
| <i>CCNF</i>    | -0,790 | 3,28E-05    | <i>ZNF792</i>     | 0,725 | 5,81E-06    |
| <i>ZNF724P</i> | -0,790 | 0,012416555 | <i>MRAS</i>       | 0,719 | 0,00989464  |
| <i>CHEK1</i>   | -0,792 | 2,90E-09    | <i>MOSPD1</i>     | 0,719 | 3,24E-10    |
| <i>CABLES2</i> | -0,795 | 0,000235275 | <i>ZNF585A</i>    | 0,718 | 0,010553768 |
| <i>DBF4B</i>   | -0,800 | 2,46E-07    | <i>DNTTIP1</i>    | 0,717 | 4,71E-08    |
| <i>RFC2</i>    | -0,800 | 0,000313882 | <i>RIOK3</i>      | 0,717 | 8,67E-07    |
| <i>KIF20B</i>  | -0,800 | 0,000153805 | <i>AMACR</i>      | 0,714 | 0,015589534 |
| <i>CCDC15</i>  | -0,800 | 0,008223661 | <i>ZNF577</i>     | 0,713 | 0,001952945 |
| <i>UBALD2</i>  | -0,801 | 1,61E-10    | <i>LPP</i>        | 0,713 | 0,029941943 |
| <i>ZWILCH</i>  | -0,802 | 1,36E-05    | <i>RPL23AP7</i>   | 0,712 | 7,25E-05    |
| <i>NUP62CL</i> | -0,802 | 9,89E-06    | <i>SPATA7</i>     | 0,710 | 0,000770573 |
| <i>RHNO1</i>   | -0,803 | 0,002545655 | <i>LAMC2</i>      | 0,710 | 0,001784492 |
| <i>ARL6IP1</i> | -0,804 | 2,05E-11    | <i>ZNF23</i>      | 0,710 | 7,24E-05    |
| <i>PKMYT1</i>  | -0,805 | 0,000151811 | <i>OTUB2</i>      | 0,708 | 7,14E-06    |

|                           |        |             |                           |       |                 |
|---------------------------|--------|-------------|---------------------------|-------|-----------------|
| <i>RBL1</i>               | -0,805 | 6,23E-09    | <i>RP4-717I23.3</i>       | 0,708 | 0,0054386<br>23 |
| <i>CENPW</i>              | -0,807 | 0,008088747 | <i>IL1RL2</i>             | 0,707 | 0,0317876<br>02 |
| <i>TUBB4B</i>             | -0,807 | 1,13E-06    | <i>ANKRD46</i>            | 0,707 | 8,62E-07        |
| <i>VRK1</i>               | -0,810 | 1,99E-07    | <i>PCMTD1</i>             | 0,706 | 0,0008343<br>8  |
| <i>C17orf53</i>           | -0,811 | 8,62E-05    | <i>CSNK1G1</i>            | 0,706 | 1,16E-12        |
| <i>ZNF519</i>             | -0,812 | 0,002166744 | <i>BX322557.10</i>        | 0,704 | 0,0035005<br>35 |
| <i>MIS18A</i>             | -0,815 | 0,007974801 | <i>SEC14L2</i>            | 0,703 | 3,75E-06        |
| <i>NCAPD3</i>             | -0,816 | 1,68E-11    | <i>GRIP1</i>              | 0,702 | 0,0466399<br>01 |
| <i>FBLN1</i>              | -0,818 | 0,041310187 | <i>SLC25A20</i>           | 0,702 | 0,0217817<br>59 |
| <i>CCDC150</i>            | -0,818 | 0,012305864 | <i>CALCOCO1</i>           | 0,701 | 2,18E-06        |
| <i>MIR210HG</i>           | -0,818 | 0,023697935 | <i>C5orf28</i>            | 0,698 | 0,0008013<br>44 |
| <i>SGOL2</i>              | -0,819 | 0,000177526 | <i>SPATS2L</i>            | 0,698 | 1,93E-06        |
| <i>WDHD1</i>              | -0,819 | 2,51E-06    | <i>ZNF235</i>             | 0,696 | 0,0199035<br>61 |
| <i>EFCAB11</i>            | -0,821 | 0,002473676 | <i>C10orf11</i>           | 0,694 | 0,0004944<br>22 |
| <i>RRM1</i>               | -0,822 | 8,30E-07    | <i>TM7SF3</i>             | 0,693 | 1,79E-16        |
| <i>ARHGAP11B</i>          | -0,823 | 1,74E-06    | <i>IMMP2L</i>             | 0,692 | 2,68E-07        |
| <i>LMNB1</i>              | -0,823 | 1,73E-09    | <i>TMCC1-AS1</i>          | 0,692 | 0,0077522<br>78 |
| <i>SLC30A3</i>            | -0,824 | 0,004376498 | <i>KRT5</i>               | 0,691 | 9,44E-08        |
| <i>ZNF700</i>             | -0,825 | 0,033123544 | <i>LIPA</i>               | 0,691 | 2,27E-06        |
| <i>TRIM59</i>             | -0,828 | 0,000725648 | <i>SQRDL</i>              | 0,690 | 0,0022656<br>39 |
| <i>CORO1A</i>             | -0,829 | 0,028932252 | <i>CYLD</i>               | 0,688 | 0,0023836<br>53 |
| <i>ZNF331</i>             | -0,831 | 0,000503448 | <i>HMOX1</i>              | 0,688 | 0,0219691       |
| <i>GNG7</i>               | -0,832 | 0,001318662 | <i>CTD-<br/>2366F13.1</i> | 0,687 | 0,0055038<br>86 |
| <i>CEP128</i>             | -0,833 | 0,000946058 | <i>MAP6</i>               | 0,687 | 0,0284309<br>59 |
| <i>SPDL1</i>              | -0,834 | 9,72E-05    | <i>YPEL5</i>              | 0,687 | 0,0201129<br>27 |
| <i>LIPT2</i>              | -0,835 | 0,040564308 | <i>CDC42BPG</i>           | 0,685 | 0,0072892<br>51 |
| <i>TAF5</i>               | -0,839 | 4,97E-07    | <i>SNAP23</i>             | 0,681 | 7,89E-07        |
| <i>CTD-<br/>2207O23.3</i> | -0,839 | 0,018723084 | <i>EI24</i>               | 0,681 | 7,55E-05        |
| <i>CHAF1B</i>             | -0,841 | 8,89E-05    | <i>TEX9</i>               | 0,679 | 0,0263182<br>79 |
| <i>DCK</i>                | -0,844 | 2,18E-08    | <i>SSR3</i>               | 0,678 | 0,0005602<br>68 |
| <i>FGFR3</i>              | -0,847 | 0,003689073 | <i>DAB2</i>               | 0,678 | 0,0466938<br>21 |
| <i>C1orf112</i>           | -0,847 | 0,000232408 | <i>ELK3</i>               | 0,676 | 0,0018354<br>52 |

|                      |        |             |                  |       |             |
|----------------------|--------|-------------|------------------|-------|-------------|
| <i>EDAR</i>          | -0,848 | 0,002373602 | <i>DUXAP8_1</i>  | 0,676 | 1,93E-08    |
| <i>CENPM</i>         | -0,850 | 7,26E-07    | <i>PTK6</i>      | 0,676 | 0,006953275 |
| <i>DNA2</i>          | -0,850 | 6,01E-05    | <i>TNFRSF10B</i> | 0,676 | 2,02E-14    |
| <i>NCAPD2</i>        | -0,851 | 8,08E-09    | <i>NINJ1</i>     | 0,675 | 0,000155465 |
| <i>HR</i>            | -0,851 | 0,00117744  | <i>DNAH17</i>    | 0,672 | 0,01225677  |
| <i>ARHGAP11A</i>     | -0,852 | 5,95E-09    | <i>TAB3</i>      | 0,671 | 3,12E-09    |
| <i>GIN51</i>         | -0,853 | 3,12E-09    | <i>BLCAP</i>     | 0,671 | 1,41E-08    |
| <i>MKI67</i>         | -0,855 | 8,62E-05    | <i>UBE2H</i>     | 0,668 | 2,19E-12    |
| <i>PRR11</i>         | -0,855 | 1,22E-05    | <i>CAV2</i>      | 0,667 | 0,000186513 |
| <i>CENPQ</i>         | -0,855 | 0,000124715 | <i>ATG4A</i>     | 0,667 | 0,003214146 |
| <i>KIF18A</i>        | -0,856 | 2,33E-05    | <i>CPEB4</i>     | 0,666 | 0,000606932 |
| <i>KIF23</i>         | -0,856 | 1,21E-08    | <i>TMEM17</i>    | 0,666 | 0,034230488 |
| <i>PRIM1</i>         | -0,856 | 2,04E-07    | <i>ZNF337</i>    | 0,666 | 3,25E-05    |
| <i>YPEL1</i>         | -0,859 | 0,005969591 | <i>DGKA</i>      | 0,665 | 2,79E-09    |
| <i>KIAA0101</i>      | -0,860 | 1,58E-06    | <i>ZNF195</i>    | 0,664 | 0,000717455 |
| <i>TCF19</i>         | -0,864 | 0,000197222 | <i>ANXA2</i>     | 0,664 | 6,21E-06    |
| <i>MCM6</i>          | -0,864 | 2,30E-09    | <i>SHC1</i>      | 0,664 | 1,04E-06    |
| <i>XRCC2</i>         | -0,867 | 5,34E-06    | <i>MT-ATP8</i>   | 0,663 | 9,49E-13    |
| <i>CLSPN</i>         | -0,867 | 0,000365123 | <i>SLC5A3</i>    | 0,660 | 0,013414239 |
| <i>UHRF1</i>         | -0,869 | 0,00177335  | <i>ZNF252P</i>   | 0,659 | 0,000698072 |
| <i>MARVELD3</i>      | -0,870 | 0,024918508 | <i>C11orf54</i>  | 0,659 | 0,025917539 |
| <i>TACC3</i>         | -0,872 | 8,03E-06    | <i>RNF182</i>    | 0,658 | 0,000958529 |
| <i>POC1A</i>         | -0,876 | 4,48E-05    | <i>NME7</i>      | 0,658 | 8,56E-06    |
| <i>ATP2C2</i>        | -0,879 | 0,001440848 | <i>TMEM68</i>    | 0,658 | 0,001240502 |
| <i>DUT</i>           | -0,881 | 1,57E-09    | <i>IMPACT</i>    | 0,655 | 2,48E-05    |
| <i>TUBA1B</i>        | -0,881 | 7,99E-10    | <i>MFSD1</i>     | 0,650 | 9,07E-05    |
| <i>MCM4</i>          | -0,881 | 4,59E-08    | <i>TRIB1</i>     | 0,650 | 5,78E-05    |
| <i>SKA3</i>          | -0,882 | 7,86E-05    | <i>FAM172A</i>   | 0,650 | 0,006214533 |
| <i>FAM110A</i>       | -0,883 | 0,000108966 | <i>AP1S3</i>     | 0,649 | 0,000768686 |
| <i>RP5-1120P11.1</i> | -0,884 | 0,021176613 | <i>TMEM50B</i>   | 0,648 | 0,004972455 |
| <i>FANCG</i>         | -0,886 | 2,08E-09    | <i>ZNF461</i>    | 0,648 | 0,025488144 |
| <i>PRKAG2-AS1</i>    | -0,887 | 0,015967585 | <i>RPL22L1</i>   | 0,646 | 0,000289082 |
| <i>MCM7</i>          | -0,887 | 1,98E-08    | <i>C21orf91</i>  | 0,646 | 0,006342788 |

|                     |        |             |                   |       |                 |
|---------------------|--------|-------------|-------------------|-------|-----------------|
| <i>AC004381.6</i>   | -0,888 | 0,003493334 | <i>GPATCH11</i>   | 0,645 | 0,0002285<br>04 |
| <i>NEMP2</i>        | -0,889 | 0,045229343 | <i>ABL2</i>       | 0,645 | 9,78E-05        |
| <i>MTBP</i>         | -0,892 | 9,72E-05    | <i>ZNF440</i>     | 0,644 | 0,0035980<br>11 |
| <i>MCM2</i>         | -0,893 | 5,79E-09    | <i>ANK2</i>       | 0,643 | 0,0190811<br>83 |
| <i>C19orf57</i>     | -0,894 | 0,004323147 | <i>GNPDA1</i>     | 0,641 | 2,96E-05        |
| <i>STIL</i>         | -0,897 | 1,50E-08    | <i>NOL6</i>       | 0,640 | 0,0057888<br>13 |
| <i>RECQL4</i>       | -0,898 | 4,97E-07    | <i>MEGF11</i>     | 0,637 | 0,0263001<br>29 |
| <i>DSN1</i>         | -0,901 | 4,07E-11    | <i>TEP1</i>       | 0,637 | 4,23E-06        |
| <i>UBE2C</i>        | -0,902 | 1,91E-09    | <i>ACTN1</i>      | 0,636 | 5,49E-09        |
| <i>RP5-991G20.1</i> | -0,902 | 0,007874601 | <i>MLPH</i>       | 0,635 | 0,0115141<br>95 |
| <i>TRIP13</i>       | -0,906 | 9,16E-10    | <i>CROT</i>       | 0,634 | 0,0013206<br>67 |
| <i>CDKN3</i>        | -0,907 | 6,36E-09    | <i>TSPAN31</i>    | 0,634 | 0,0001809<br>21 |
| <i>RP11-849H4.2</i> | -0,907 | 0,018069111 | <i>POLH</i>       | 0,634 | 8,34E-06        |
| <i>POLA2</i>        | -0,908 | 2,69E-12    | <i>BTBD10</i>     | 0,633 | 0,0002533       |
| <i>HELLS</i>        | -0,909 | 2,45E-08    | <i>ASAP1</i>      | 0,633 | 1,50E-05        |
| <i>PTTG1</i>        | -0,909 | 1,05E-10    | <i>KRT8</i>       | 0,633 | 0,0007108<br>21 |
| <i>KIF4A</i>        | -0,912 | 2,92E-05    | <i>ZNF225</i>     | 0,632 | 0,0159098<br>28 |
| <i>CENPN</i>        | -0,912 | 1,33E-06    | <i>HSPA4L</i>     | 0,631 | 6,65E-07        |
| <i>CTSV</i>         | -0,914 | 8,83E-09    | <i>PLCD3</i>      | 0,630 | 6,08E-10        |
| <i>RFC3</i>         | -0,914 | 1,24E-07    | <i>CST2</i>       | 0,630 | 0,0289765<br>48 |
| <i>YBX2</i>         | -0,915 | 0,000345818 | <i>PMEPA1</i>     | 0,629 | 0,0001270<br>3  |
| <i>RACGAP1</i>      | -0,917 | 2,23E-10    | <i>BIK</i>        | 0,629 | 8,51E-05        |
| <i>ATAD5</i>        | -0,917 | 3,27E-06    | <i>APP</i>        | 0,628 | 1,25E-05        |
| <i>RFC5</i>         | -0,917 | 2,93E-10    | <i>ERVMER34-1</i> | 0,627 | 0,0020801<br>73 |
| <i>FAM72B</i>       | -0,918 | 0,022064317 | <i>ZNF446</i>     | 0,626 | 0,0114093<br>6  |
| <i>ZWINT</i>        | -0,920 | 1,86E-06    | <i>ZNF420</i>     | 0,625 | 0,0086706<br>75 |
| <i>CH507-24F1.1</i> | -0,922 | 0,049837351 | <i>ZNF354A</i>    | 0,624 | 0,0007341<br>27 |
| <i>ID3</i>          | -0,923 | 0,031317712 | <i>THSD4</i>      | 0,624 | 0,0004064<br>61 |
| <i>POLE2</i>        | -0,925 | 1,76E-05    | <i>LAMTOR3</i>    | 0,622 | 0,0005828<br>07 |
| <i>MELK</i>         | -0,925 | 2,68E-07    | <i>HMGA2</i>      | 0,622 | 0,0001508<br>85 |
| <i>BARD1</i>        | -0,926 | 0,000794962 | <i>CHIC1</i>      | 0,621 | 0,0051184<br>79 |
| <i>CHAF1A</i>       | -0,926 | 3,40E-06    | <i>ZNF613</i>     | 0,620 | 0,0329528<br>07 |
| <i>IL22RA1</i>      | -0,928 | 0,000279109 | <i>SUSD6</i>      | 0,619 | 8,53E-06        |

|                 |        |             |                           |       |                 |
|-----------------|--------|-------------|---------------------------|-------|-----------------|
| <i>UBE2S</i>    | -0,929 | 1,26E-07    | <i>MMAA</i>               | 0,618 | 0,0111223<br>94 |
| <i>HAUS3</i>    | -0,929 | 0,048239638 | <i>HEATR5B</i>            | 0,616 | 0,0005866<br>37 |
| <i>C21orf58</i> | -0,930 | 4,96E-05    | <i>KCNAB2</i>             | 0,616 | 0,0045543<br>9  |
| <i>NCAPG2</i>   | -0,930 | 7,99E-10    | <i>TNFAIP1</i>            | 0,616 | 2,66E-05        |
| <i>TLE2</i>     | -0,931 | 0,048432003 | <i>S100A11</i>            | 0,616 | 3,55E-05        |
| <i>FBXO5</i>    | -0,932 | 3,07E-05    | <i>CD58</i>               | 0,615 | 0,0008581<br>43 |
| <i>KIF24</i>    | -0,933 | 0,000253332 | <i>NTPCR</i>              | 0,615 | 8,19E-07        |
| <i>TMPO-AS1</i> | -0,933 | 0,000766001 | <i>MT-ND4L</i>            | 0,615 | 3,54E-05        |
| <i>KNTC1</i>    | -0,933 | 4,47E-05    | <i>CLN8</i>               | 0,614 | 0,0002845<br>44 |
| <i>CENPO</i>    | -0,939 | 8,06E-09    | <i>SLC38A7</i>            | 0,613 | 0,0003828<br>77 |
| <i>KIAA1524</i> | -0,939 | 4,17E-06    | <i>HIST3H2A</i>           | 0,613 | 0,0217338<br>81 |
| <i>TPX2</i>     | -0,940 | 1,30E-09    | <i>SLC17A5</i>            | 0,613 | 1,64E-06        |
| <i>AURKA</i>    | -0,943 | 4,87E-10    | <i>RASGRF1</i>            | 0,612 | 0,0008729<br>38 |
| <i>ZNF367</i>   | -0,947 | 1,33E-06    | <i>INPP1</i>              | 0,611 | 8,67E-06        |
| <i>CIT</i>      | -0,949 | 3,29E-05    | <i>TGFB1</i>              | 0,611 | 7,24E-06        |
| <i>CDC20</i>    | -0,951 | 1,42E-07    | <i>C18orf32</i>           | 0,610 | 0,0031455<br>61 |
| <i>DNMT3B</i>   | -0,951 | 0,000237273 | <i>ZNF674</i>             | 0,610 | 0,0249877<br>35 |
| <i>KIF22</i>    | -0,952 | 7,56E-10    | <i>RHOBTB1</i>            | 0,609 | 0,0334430<br>19 |
| <i>GPR137C</i>  | -0,952 | 0,025566903 | <i>TBX3</i>               | 0,608 | 0,0051418<br>54 |
| <i>SMC4</i>     | -0,952 | 1,33E-06    | <i>LENG9</i>              | 0,607 | 0,0034540<br>41 |
| <i>CDCA2</i>    | -0,952 | 1,01E-07    | <i>IP6K2</i>              | 0,605 | 9,66E-05        |
| <i>C14orf80</i> | -0,953 | 8,62E-05    | <i>GPRC5A</i>             | 0,605 | 0,0429635<br>5  |
| <i>BRCA1</i>    | -0,955 | 1,30E-08    | <i>FOSL1</i>              | 0,603 | 0,0103547<br>09 |
| <i>CENPK</i>    | -0,956 | 1,29E-06    | <i>PGBD2</i>              | 0,603 | 0,0089739<br>47 |
| <i>DSCC1</i>    | -0,958 | 1,05E-06    | <i>DCAF10</i>             | 0,601 | 0,0154620<br>96 |
| <i>FAM111B</i>  | -0,959 | 0,000356973 | <i>RRAGC</i>              | 0,600 | 0,0006073<br>15 |
| <i>ARHGEF16</i> | -0,962 | 0,003014164 | <i>RP11-<br/>545J16.1</i> | 0,600 | 0,0126929<br>59 |
| <i>ASPM</i>     | -0,962 | 9,99E-07    | <i>ZNF181</i>             | 0,598 | 3,68E-05        |
| <i>NXPH4</i>    | -0,962 | 5,24E-07    | <i>MTMR10</i>             | 0,598 | 0,0020161<br>98 |
| <i>CDCA5</i>    | -0,962 | 3,37E-07    | <i>LRP1</i>               | 0,597 | 0,0327620<br>95 |
| <i>ATAD2</i>    | -0,969 | 8,92E-08    | <i>ZNF556</i>             | 0,596 | 0,0278241<br>12 |

|                     |        |             |                      |        |                 |
|---------------------|--------|-------------|----------------------|--------|-----------------|
| <i>DIAPH3</i>       | -0,969 | 1,36E-08    | <i>BTG1</i>          | 0,595  | 0,0004912<br>25 |
| <i>FANCI</i>        | -0,974 | 2,84E-09    | <i>CTBS</i>          | 0,595  | 0,0352557<br>73 |
| <i>RHEBL1</i>       | -0,976 | 4,76E-07    | <i>CARNMT1</i>       | 0,594  | 5,08E-05        |
| <i>CDH1</i>         | -0,978 | 0,027872854 | <i>FAM214A</i>       | 0,594  | 0,0006662<br>53 |
| <i>ORC6</i>         | -0,978 | 7,24E-08    | <i>ZNF226</i>        | 0,593  | 0,0018424<br>5  |
| <i>CASC5</i>        | -0,978 | 2,46E-07    | <i>C11orf1</i>       | 0,593  | 0,0152179<br>22 |
| <i>H2AFX</i>        | -0,981 | 2,07E-05    | <i>RANBP10</i>       | 0,592  | 8,27E-07        |
| <i>RP11-76217.5</i> | -0,981 | 0,031191975 | <i>BBS4</i>          | 0,591  | 0,0012827<br>36 |
| <i>MYBL2</i>        | -0,987 | 4,09E-09    | <i>ZNF600</i>        | 0,591  | 0,0009412<br>56 |
| <i>KIF14</i>        | -0,988 | 1,46E-05    | <i>ADAM19</i>        | 0,591  | 9,23E-05        |
| <i>PRKAR2B</i>      | -0,988 | 0,000279108 | <i>SH3BGRL3</i>      | 0,591  | 0,0063134<br>48 |
| <i>CDKN2C</i>       | -0,988 | 7,17E-09    | <i>EXOC4</i>         | 0,590  | 8,34E-06        |
| <i>CCNB1</i>        | -0,988 | 5,10E-12    | <i>SGK223</i>        | 0,590  | 7,09E-05        |
| <i>POLQ</i>         | -0,993 | 6,21E-07    | <i>S100A10</i>       | 0,590  | 0,0005199<br>02 |
| <i>ORC1</i>         | -0,995 | 7,34E-09    | <i>ATP6V0E1</i>      | 0,590  | 0,0001948<br>07 |
| <i>DHFR</i>         | -0,996 | 3,27E-07    | <i>DISP2</i>         | 0,589  | 0,0003085<br>69 |
| <i>RRM2</i>         | -0,997 | 1,56E-07    | <i>PRKAB2</i>        | 0,589  | 0,0003266<br>13 |
| <i>ZGRF1</i>        | -1,001 | 2,22E-09    | <i>ARL4C</i>         | 0,586  | 4,54E-05        |
| <i>MCM5</i>         | -1,001 | 3,96E-08    | <i>FANK1</i>         | 0,586  | 0,0429828<br>56 |
| <i>MTFR2</i>        | -1,003 | 2,44E-09    | <i>ENPP5</i>         | 0,586  | 0,0302011<br>75 |
| <i>CCNB2</i>        | -1,003 | 1,37E-11    | <i>S100A6</i>        | 0,585  | 5,26E-05        |
| <i>BUB1B</i>        | -1,004 | 6,73E-10    | <i>PIK3R2</i>        | 0,585  | 0,0216377<br>01 |
| <i>TROAP</i>        | -1,004 | 8,81E-13    | <i>TAF13</i>         | 0,584  | 0,0012402<br>22 |
| <i>TRAIP</i>        | -1,005 | 1,86E-06    | <i>KBTBD3</i>        | 0,584  | 0,0493980<br>7  |
| <i>CDC6</i>         | -1,005 | 6,16E-08    | <i>LTB</i>           | 0,583  | 0,0276248<br>27 |
| <i>HMMR</i>         | -1,007 | 1,71E-08    | <i>COL7A1</i>        | 0,583  | 0,0319136<br>34 |
| <i>NCAPG</i>        | -1,008 | 1,65E-07    | <i>RIN2</i>          | 0,582  | 0,0155299<br>83 |
| <i>KIF11</i>        | -1,009 | 1,18E-09    | <i>KRT19</i>         | 0,582  | 1,74E-06        |
| <i>MAD2L1</i>       | -1,011 | 4,84E-10    | <i>GAA</i>           | 0,582  | 0,0495832<br>43 |
| <i>BRIP1</i>        | -1,011 | 2,36E-06    | <i>RP11-958N24.1</i> | -0,581 | 0,0315231<br>46 |
| <i>MCM10</i>        | -1,013 | 3,90E-07    | <i>SOGA3_1</i>       | -0,581 | 0,0347894<br>64 |



|                     |        |             |                       |        |             |
|---------------------|--------|-------------|-----------------------|--------|-------------|
| <i>ESPL1</i>        | -1,013 | 7,34E-09    | <i>HNRNPUL2-BSCL2</i> | -0,582 | 0,000450606 |
| <i>TTK</i>          | -1,015 | 3,10E-06    | <i>MEGF9</i>          | -0,583 | 0,021940787 |
| <i>OIP5</i>         | -1,018 | 2,99E-09    | <i>ATF5</i>           | -0,584 | 0,035265896 |
| <i>KIF15</i>        | -1,020 | 5,85E-07    | <i>RP11-347C12.1</i>  | -0,584 | 0,020674542 |
| <i>PSMC3IP</i>      | -1,022 | 4,19E-07    | <i>FANCE</i>          | -0,584 | 0,001726722 |
| <i>GTSE1</i>        | -1,023 | 1,05E-08    | <i>RP11-514P8.7</i>   | -0,585 | 0,026845285 |
| <i>MASTL</i>        | -1,024 | 1,20E-09    | <i>TSPAN33</i>        | -0,586 | 0,031552339 |
| <i>CENPH</i>        | -1,027 | 3,28E-12    | <i>FHOD1</i>          | -0,587 | 0,002094599 |
| <i>KIF18B</i>       | -1,027 | 3,87E-09    | <i>ADRBK1</i>         | -0,587 | 1,88E-07    |
| <i>BIRC5</i>        | -1,029 | 1,35E-09    | <i>P3H3</i>           | -0,588 | 0,00400559  |
| <i>RP11-244M2.1</i> | -1,030 | 0,034696345 | <i>PTMS</i>           | -0,588 | 7,25E-07    |
| <i>ARHGEF39</i>     | -1,030 | 9,81E-09    | <i>PMM1</i>           | -0,588 | 0,000434791 |
| <i>TOP2A</i>        | -1,032 | 8,92E-08    | <i>GMNN</i>           | -0,589 | 7,52E-05    |
| <i>ESCO2</i>        | -1,034 | 1,01E-08    | <i>MEIS3</i>          | -0,589 | 0,015799407 |
| <i>RNASEH2A</i>     | -1,039 | 6,82E-09    | <i>ZNF714</i>         | -0,590 | 0,000734172 |
| <i>DEPDC1</i>       | -1,039 | 1,36E-08    | <i>RFX1</i>           | -0,591 | 0,000143543 |
| <i>OAS3</i>         | -1,041 | 0,001884149 | <i>ECT2</i>           | -0,591 | 0,003518385 |
| <i>HJURP</i>        | -1,049 | 1,28E-07    | <i>TUBGCP3</i>        | -0,595 | 4,52E-08    |
| <i>NUSAP1</i>       | -1,050 | 1,81E-10    | <i>DDX39A</i>         | -0,595 | 9,79E-05    |
| <i>HAUS4</i>        | -1,051 | 2,79E-05    | <i>FZR1</i>           | -0,596 | 8,58E-06    |
| <i>RAD51</i>        | -1,054 | 7,38E-10    | <i>RP11-1212A22.1</i> | -0,597 | 2,27E-05    |
| <i>SHCBP1</i>       | -1,055 | 1,44E-08    | <i>CDCA4</i>          | -0,597 | 2,60E-05    |
| <i>FANCB</i>        | -1,056 | 6,45E-07    | <i>UQCC2</i>          | -0,598 | 2,27E-06    |
| <i>DEPDC1B</i>      | -1,056 | 1,61E-10    | <i>LIN9</i>           | -0,598 | 3,72E-06    |
| <i>DTL</i>          | -1,056 | 4,52E-08    | <i>RIMKLA</i>         | -0,598 | 0,006820742 |
| <i>WDR76</i>        | -1,056 | 2,22E-06    | <i>PSIP1</i>          | -0,598 | 3,57E-09    |
| <i>PSRC1</i>        | -1,056 | 6,45E-10    | <i>POLD3</i>          | -0,599 | 0,000132531 |
| <i>UBE2T</i>        | -1,058 | 1,86E-12    | <i>PIGS</i>           | -0,599 | 2,00E-05    |
| <i>TP73</i>         | -1,058 | 7,30E-05    | <i>DCLRE1B</i>        | -0,603 | 7,53E-05    |
| <i>KIF20A</i>       | -1,060 | 3,24E-12    | <i>IGSF9</i>          | -0,603 | 0,006141125 |
| <i>ASF1B</i>        | -1,060 | 2,25E-06    | <i>NFKBID</i>         | -0,605 | 0,004803755 |
| <i>CDCA8</i>        | -1,062 | 1,73E-09    | <i>PET100</i>         | -0,606 | 0,005529367 |
| <i>APOBEC3B</i>     | -1,063 | 9,75E-06    | <i>PAFAH1B3</i>       | -0,607 | 2,88E-08    |

|                   |        |             |                      |        |                 |
|-------------------|--------|-------------|----------------------|--------|-----------------|
| <i>PLK4</i>       | -1,063 | 2,27E-13    | <i>BUD13</i>         | -0,609 | 3,74E-07        |
| <i>NCAPH</i>      | -1,063 | 1,48E-08    | <i>ARHGEF19</i>      | -0,609 | 0,0011167<br>21 |
| <i>GAS2L3</i>     | -1,065 | 9,92E-08    | <i>CNTNAP1</i>       | -0,611 | 0,0257629<br>87 |
| <i>ANLN</i>       | -1,067 | 1,05E-06    | <i>NKX6-1</i>        | -0,613 | 0,0381231<br>28 |
| <i>PRC1</i>       | -1,068 | 1,49E-10    | <i>MED30</i>         | -0,613 | 0,0012696<br>12 |
| <i>C2orf48</i>    | -1,070 | 0,010992055 | <i>GPR153</i>        | -0,613 | 0,0006363<br>5  |
| <i>E2F2</i>       | -1,070 | 7,36E-05    | <i>CROCCP2_1</i>     | -0,614 | 0,0016341<br>72 |
| <i>BUB1</i>       | -1,070 | 1,24E-10    | <i>DZIP1L</i>        | -0,614 | 0,0050764<br>24 |
| <i>EXO1</i>       | -1,070 | 5,39E-07    | <i>MTFP1</i>         | -0,615 | 3,74E-06        |
| <i>PLK1</i>       | -1,072 | 3,06E-10    | <i>CCDC9</i>         | -0,615 | 1,18E-05        |
| <i>RAD54B</i>     | -1,072 | 4,32E-07    | <i>CCDC28B</i>       | -0,616 | 0,0115473<br>2  |
| <i>CENPI</i>      | -1,078 | 2,70E-08    | <i>THOC6</i>         | -0,616 | 8,44E-09        |
| <i>CEP55</i>      | -1,079 | 1,12E-08    | <i>FGFRL1</i>        | -0,616 | 0,0001728<br>92 |
| <i>EID1</i>       | -1,079 | 0,000554088 | <i>LIN54</i>         | -0,618 | 0,0001098<br>63 |
| <i>TICRR</i>      | -1,080 | 2,58E-05    | <i>HCP5</i>          | -0,620 | 0,0377018<br>6  |
| <i>CDC45</i>      | -1,081 | 6,68E-10    | <i>ALYREF</i>        | -0,620 | 0,0009509<br>24 |
| <i>DERL3</i>      | -1,081 | 2,65E-05    | <i>SERPINB9</i>      | -0,621 | 0,0007667<br>08 |
| <i>DRP2</i>       | -1,082 | 0,038235764 | <i>RAD21</i>         | -0,622 | 6,36E-05        |
| <i>DLGAP5</i>     | -1,086 | 9,41E-10    | <i>RANBP1</i>        | -0,624 | 1,48E-06        |
| <i>LMCD1</i>      | -1,087 | 0,027970488 | <i>LSM4</i>          | -0,624 | 5,11E-05        |
| <i>CENPA</i>      | -1,088 | 1,78E-08    | <i>FZD7</i>          | -0,625 | 7,71E-05        |
| <i>CDK1</i>       | -1,089 | 4,85E-10    | <i>CNFN</i>          | -0,625 | 0,0269276<br>44 |
| <i>FAM64A</i>     | -1,089 | 2,59E-10    | <i>DCXR</i>          | -0,627 | 0,0005828<br>94 |
| <i>NDC80</i>      | -1,091 | 3,62E-08    | <i>CROCCP2_2</i>     | -0,627 | 0,0043832<br>09 |
| <i>MYB</i>        | -1,091 | 0,001455383 | <i>TMPO</i>          | -0,628 | 9,79E-08        |
| <i>SKA1</i>       | -1,094 | 2,71E-06    | <i>RP11-362F19.1</i> | -0,628 | 0,0035128<br>67 |
| <i>AC002116.7</i> | -1,095 | 0,003458474 | <i>MAP3K6</i>        | -0,628 | 0,0083637<br>15 |
| <i>AURKB</i>      | -1,095 | 9,88E-12    | <i>METRNL</i>        | -0,629 | 0,0302710<br>27 |
| <i>SPC24</i>      | -1,096 | 4,97E-08    | <i>WEE1</i>          | -0,631 | 3,86E-05        |
| <i>FANCD2</i>     | -1,098 | 4,56E-10    | <i>CILP2</i>         | -0,631 | 0,0318452<br>11 |
| <i>GINS2</i>      | -1,106 | 5,61E-09    | <i>CEP131</i>        | -0,632 | 5,20E-05        |
| <i>CDCA3</i>      | -1,108 | 4,90E-14    | <i>FAM72A</i>        | -0,632 | 0,0006012<br>98 |

|                 |        |             |                      |        |                 |
|-----------------|--------|-------------|----------------------|--------|-----------------|
| <i>RIBC2</i>    | -1,112 | 0,004366858 | <i>RP1-151F17.1</i>  | -0,633 | 0,0258767<br>2  |
| <i>FAM105A</i>  | -1,112 | 0,004440729 | <i>GALNT12</i>       | -0,633 | 0,0065598<br>13 |
| <i>C18orf54</i> | -1,113 | 8,26E-05    | <i>Sep 04</i>        | -0,634 | 0,0007324<br>72 |
| <i>SGOL1</i>    | -1,115 | 2,45E-07    | <i>HSD17B6</i>       | -0,634 | 0,0247830<br>66 |
| <i>CDT1</i>     | -1,116 | 1,61E-07    | <i>CBR3</i>          | -0,634 | 0,0311892<br>58 |
| <i>CENPU</i>    | -1,117 | 1,93E-09    | <i>CCDC77</i>        | -0,634 | 9,56E-06        |
| <i>CCNA2</i>    | -1,118 | 1,36E-08    | <i>SLX4</i>          | -0,634 | 0,0001391<br>11 |
| <i>E2F1</i>     | -1,120 | 3,76E-10    | <i>CENPL</i>         | -0,634 | 0,0008168<br>43 |
| <i>NRGN</i>     | -1,123 | 1,95E-09    | <i>RFC3</i>          | -0,637 | 0,0003587<br>37 |
| <i>MND1</i>     | -1,126 | 1,41E-08    | <i>COL26A1</i>       | -0,638 | 0,0134372<br>46 |
| <i>IQGAP3</i>   | -1,127 | 2,25E-06    | <i>OVOL2</i>         | -0,638 | 0,0474310<br>3  |
| <i>BLM</i>      | -1,129 | 9,36E-08    | <i>RIPK4</i>         | -0,640 | 0,0023078<br>31 |
| <i>SERTAD4</i>  | -1,134 | 0,005080172 | <i>KPNA2</i>         | -0,640 | 5,06E-06        |
| <i>PIF1</i>     | -1,135 | 4,37E-10    | <i>TCTN2</i>         | -0,641 | 0,0025137<br>39 |
| <i>FOXM1</i>    | -1,138 | 3,53E-10    | <i>SMO</i>           | -0,641 | 0,0069407<br>19 |
| <i>XRCC3</i>    | -1,147 | 1,11E-08    | <i>C9orf142</i>      | -0,641 | 0,0003112<br>77 |
| <i>LCK</i>      | -1,157 | 0,003796094 | <i>NASP</i>          | -0,641 | 3,10E-08        |
| <i>SPAG5</i>    | -1,159 | 3,35E-09    | <i>CDKN2A</i>        | -0,642 | 1,81E-06        |
| <i>MNS1</i>     | -1,164 | 0,012100336 | <i>RP11-599B13.6</i> | -0,643 | 0,0290951<br>6  |
| <i>RAD51AP1</i> | -1,165 | 9,11E-10    | <i>ADORA1</i>        | -0,643 | 0,0291111<br>06 |
| <i>HMGB2</i>    | -1,168 | 3,89E-14    | <i>KLHL25</i>        | -0,645 | 1,32E-06        |
| <i>RMI2</i>     | -1,174 | 2,05E-14    | <i>KNSTRN</i>        | -0,646 | 2,58E-07        |
| <i>KIF2C</i>    | -1,178 | 7,65E-11    | <i>ARL6IP1</i>       | -0,646 | 6,94E-08        |
| <i>ESAM</i>     | -1,180 | 0,033734909 | <i>VWA1</i>          | -0,648 | 0,0010983<br>91 |
| <i>KIFC1</i>    | -1,182 | 1,05E-10    | <i>PRR34-AS1</i>     | -0,648 | 0,0323208<br>63 |
| <i>FEN1</i>     | -1,187 | 6,35E-06    | <i>FANCC</i>         | -0,649 | 4,55E-05        |
| <i>TK1</i>      | -1,209 | 2,75E-11    | <i>DOT1L</i>         | -0,649 | 9,61E-06        |
| <i>SPC25</i>    | -1,209 | 2,81E-09    | <i>TMEM52</i>        | -0,650 | 0,0050764<br>24 |
| <i>NUF2</i>     | -1,219 | 8,08E-11    | <i>ASNS</i>          | -0,650 | 0,0003821<br>01 |
| <i>CKAP2L</i>   | -1,223 | 1,32E-13    | <i>SP6</i>           | -0,650 | 0,0019849<br>04 |
| <i>E2F8</i>     | -1,224 | 9,96E-09    | <i>SKA2</i>          | -0,651 | 2,04E-05        |
| <i>HPSE</i>     | -1,226 | 2,74E-08    | <i>PER1</i>          | -0,651 | 0,0022698<br>45 |

|                       |        |             |                   |        |                 |
|-----------------------|--------|-------------|-------------------|--------|-----------------|
| <i>CARD8</i>          | -1,229 | 0,001193163 | <i>NABP2</i>      | -0,651 | 1,02E-11        |
| <i>CSH2</i>           | -1,235 | 4,52E-08    | <i>IGFLR1</i>     | -0,653 | 0,0204608<br>37 |
| <i>RDM1</i>           | -1,241 | 5,11E-09    | <i>PMEL</i>       | -0,654 | 0,0088694<br>23 |
| <i>CKS1B</i>          | -1,242 | 1,03E-10    | <i>IMPA2</i>      | -0,655 | 3,28E-05        |
| <i>NMU</i>            | -1,242 | 4,72E-13    | <i>CNTROB</i>     | -0,656 | 3,04E-10        |
| <i>NEK2</i>           | -1,244 | 8,40E-12    | <i>SP4</i>        | -0,656 | 0,0003690<br>83 |
| <i>NEIL3</i>          | -1,259 | 1,09E-09    | <i>FGFR4</i>      | -0,658 | 0,0008919<br>78 |
| <i>STMND1</i>         | -1,264 | 0,015092016 | <i>NT5DC2</i>     | -0,659 | 0,0002853<br>06 |
| <i>ARHGAP33</i>       | -1,268 | 2,31E-07    | <i>PHIP</i>       | -0,660 | 0,0001093<br>85 |
| <i>PBK</i>            | -1,268 | 1,03E-12    | <i>FKBP5</i>      | -0,660 | 2,70E-08        |
| <i>RAD54L</i>         | -1,273 | 6,82E-12    | <i>C16orf93</i>   | -0,661 | 0,0045007<br>98 |
| <i>ZNF492</i>         | -1,273 | 0,022064317 | <i>ACD</i>        | -0,662 | 4,40E-06        |
| <i>FAM72D</i>         | -1,285 | 7,98E-07    | <i>LRRC45</i>     | -0,663 | 0,0008955<br>71 |
| <i>CLGN</i>           | -1,297 | 0,029234406 | <i>RASSF2</i>     | -0,663 | 0,0158464<br>21 |
| <i>GPR19</i>          | -1,316 | 0,000599146 | <i>RASIP1</i>     | -0,664 | 0,0365064<br>59 |
| <i>C2CD4C</i>         | -1,318 | 0,030246446 | <i>PHLPP1</i>     | -0,664 | 0,0093831<br>15 |
| <i>CDC25C</i>         | -1,324 | 6,70E-14    | <i>PPIH</i>       | -0,664 | 3,38E-05        |
| <i>AC005076.5</i>     | -1,325 | 0,039117899 | <i>MMS22L</i>     | -0,664 | 0,0026111<br>26 |
| <i>SUV39H1</i>        | -1,346 | 0,015806828 | <i>PBX1</i>       | -0,664 | 0,0111298<br>02 |
| <i>DDIAS</i>          | -1,373 | 0,000994535 | <i>AC007277.3</i> | -0,665 | 0,0006838<br>92 |
| <i>SERTAD4-AS1</i>    | -1,373 | 0,044577328 | <i>SEMA6C</i>     | -0,665 | 0,0489533<br>32 |
| <i>EME1</i>           | -1,384 | 6,50E-09    | <i>CDC25A</i>     | -0,667 | 0,0002977<br>59 |
| <i>CH507-145C22.1</i> | -1,384 | 1,46E-05    | <i>SYNGR1</i>     | -0,668 | 0,0328056<br>85 |
| <i>RTKN2</i>          | -1,478 | 4,29E-07    | <i>HAT1</i>       | -0,669 | 3,49E-06        |
| <i>C5orf34</i>        | -1,480 | 9,90E-09    | <i>CLASRP</i>     | -0,671 | 1,12E-10        |
| <i>SLPI</i>           | -1,494 | 0,000338532 | <i>TCF7</i>       | -0,672 | 2,79E-09        |
| <i>TCAM1P</i>         | -1,505 | 0,011994168 | <i>C11orf84</i>   | -0,673 | 9,17E-10        |
| <i>KIAA0391</i>       | -1,549 | 6,75E-07    | <i>LRP4</i>       | -0,673 | 0,0009231<br>47 |
| <i>ZNF695</i>         | -1,594 | 0,006765353 | <i>PXMP4</i>      | -0,673 | 0,0007401<br>79 |
| <i>RASD1</i>          | -1,632 | 0,027200236 | <i>ANAPC11</i>    | -0,674 | 1,07E-05        |
| <i>FXVD6</i>          | -1,669 | 0,000116367 | <i>OTX1</i>       | -0,676 | 0,0484429<br>12 |
| <i>DMBX1</i>          | -1,678 | 0,036842853 | <i>FBXL16</i>     | -0,679 | 0,0067500<br>86 |

|                   |        |             |                     |        |                 |
|-------------------|--------|-------------|---------------------|--------|-----------------|
| <i>ZNF736</i>     | -1,679 | 0,00994185  | <i>FAM46B</i>       | -0,679 | 0,0002719<br>12 |
| <i>NXPH3</i>      | -1,693 | 0,038580231 | <i>SCLT1</i>        | -0,679 | 5,71E-05        |
| <i>AP000251.3</i> | -1,784 | 0,006160276 | <i>THRA</i>         | -0,681 | 1,06E-06        |
| <i>SP8</i>        | -1,785 | 0,010642966 | <i>GGH</i>          | -0,681 | 6,63E-05        |
| <i>CCDC121</i>    | -1,832 | 0,017485145 | <i>ZNF503</i>       | -0,682 | 0,0009585<br>29 |
| <i>IRF8</i>       | -1,848 | 0,004521785 | <i>RP11-77P6.2</i>  | -0,684 | 0,0237292<br>87 |
| <i>CNTNAP2</i>    | -1,866 | 0,000239909 | <i>TMEM54</i>       | -0,685 | 0,0072584<br>53 |
| <i>LHX9</i>       | -1,903 | 0,01840839  | <i>C2orf68</i>      | -0,687 | 0,0203814<br>3  |
| <i>DMC1</i>       | -1,949 | 0,033022532 | <i>RGS3</i>         | -0,687 | 0,0011285<br>5  |
| <i>GLI1</i>       | -2,098 | 0,013624157 | <i>FBF1_1</i>       | -0,688 | 0,0014398<br>04 |
| <i>C2orf78</i>    | -2,710 | 9,38E-05    | <i>GOLGA2P7</i>     | -0,688 | 0,0004472<br>69 |
|                   |        |             | <i>BAHCC1</i>       | -0,688 | 0,0121090<br>19 |
|                   |        |             | <i>ACBD7</i>        | -0,688 | 0,0001050<br>95 |
|                   |        |             | <i>KIF1A</i>        | -0,689 | 0,0155813<br>59 |
|                   |        |             | <i>RAB3IL1</i>      | -0,689 | 0,0383166<br>25 |
|                   |        |             | <i>KCNK5</i>        | -0,689 | 1,55E-09        |
|                   |        |             | <i>AC006486.9</i>   | -0,691 | 0,0108677<br>67 |
|                   |        |             | <i>CKB</i>          | -0,693 | 7,23E-11        |
|                   |        |             | <i>LINC01132</i>    | -0,694 | 0,0361023<br>89 |
|                   |        |             | <i>DCK</i>          | -0,695 | 4,76E-06        |
|                   |        |             | <i>SIVA1</i>        | -0,695 | 0,0001033<br>29 |
|                   |        |             | <i>GINS1</i>        | -0,696 | 1,39E-06        |
|                   |        |             | <i>ASCL2</i>        | -0,696 | 0,0102126<br>53 |
|                   |        |             | <i>CEP152</i>       | -0,696 | 0,0002975<br>35 |
|                   |        |             | <i>ARID5A</i>       | -0,696 | 2,24E-05        |
|                   |        |             | <i>DHRS13</i>       | -0,697 | 0,0042972<br>07 |
|                   |        |             | <i>NFATC1</i>       | -0,697 | 0,0093942<br>83 |
|                   |        |             | <i>RHNO1</i>        | -0,698 | 0,0061499<br>13 |
|                   |        |             | <i>H2AFV</i>        | -0,699 | 4,65E-08        |
|                   |        |             | <i>MSH6</i>         | -0,701 | 2,98E-06        |
|                   |        |             | <i>RP11-77K12.1</i> | -0,702 | 0,0418294<br>82 |
|                   |        |             | <i>TRIM15</i>       | -0,703 | 0,0253215<br>65 |

|                   |        |                 |
|-------------------|--------|-----------------|
| <i>FAM111B</i>    | -0,704 | 0,0100160<br>68 |
| <i>RAB26</i>      | -0,704 | 0,0093418<br>53 |
| <i>SIGIRR</i>     | -0,705 | 1,64E-05        |
| <i>RTN4R</i>      | -0,705 | 0,0026298<br>43 |
| <i>HSPA2</i>      | -0,706 | 0,0017844<br>92 |
| <i>PALM</i>       | -0,707 | 0,0091891<br>39 |
| <i>SMC1A</i>      | -0,708 | 1,44E-07        |
| <i>SMC2</i>       | -0,709 | 2,67E-05        |
| <i>SNHG19</i>     | -0,712 | 8,65E-07        |
| <i>OLFM1</i>      | -0,712 | 0,0051496<br>99 |
| <i>CALM3</i>      | -0,712 | 8,05E-06        |
| <i>AC253572.1</i> | -0,714 | 0,0396480<br>48 |
| <i>FUT1</i>       | -0,715 | 0,0023225<br>09 |
| <i>DNAJC9</i>     | -0,715 | 0,0022045<br>98 |
| <i>ARL6IP6</i>    | -0,716 | 2,05E-06        |
| <i>PRX</i>        | -0,718 | 0,0039493<br>48 |
| <i>IDH2</i>       | -0,719 | 9,66E-06        |
| <i>DDTL</i>       | -0,722 | 0,0001513<br>36 |
| <i>CHST15</i>     | -0,722 | 2,94E-06        |
| <i>SLC1A4</i>     | -0,722 | 0,0008966<br>64 |
| <i>CBX2</i>       | -0,722 | 1,46E-05        |
| <i>MTBP</i>       | -0,722 | 0,0017355<br>98 |
| <i>CEP85</i>      | -0,723 | 5,77E-07        |
| <i>SSBP3</i>      | -0,724 | 5,07E-08        |
| <i>SH2B2</i>      | -0,725 | 0,0008729<br>38 |
| <i>LMO2</i>       | -0,725 | 8,98E-17        |
| <i>FAAP24</i>     | -0,725 | 0,0006729<br>75 |
| <i>MYO19</i>      | -0,725 | 2,55E-13        |
| <i>PER2</i>       | -0,727 | 0,0362046<br>57 |
| <i>GRTP1</i>      | -0,728 | 0,0496138<br>43 |
| <i>TUBG1</i>      | -0,728 | 3,22E-07        |
| <i>SUV420H2</i>   | -0,728 | 0,0012542<br>41 |
| <i>DPF1</i>       | -0,728 | 0,0053217<br>4  |

|                           |        |                 |
|---------------------------|--------|-----------------|
| <i>ASAP3</i>              | -0,731 | 0,0466876<br>42 |
| <i>CCSAP</i>              | -0,732 | 2,57E-08        |
| <i>RASD2</i>              | -0,733 | 0,0052499<br>85 |
| <i>RAET1E-<br/>AS1_1</i>  | -0,734 | 0,0205352<br>28 |
| <i>B4GALNT1</i>           | -0,734 | 0,0019960<br>41 |
| <i>RP13-672B3.2</i>       | -0,735 | 0,0027994<br>22 |
| <i>EID1</i>               | -0,736 | 0,0223957<br>53 |
| <i>NKD2</i>               | -0,737 | 0,0180927<br>7  |
| <i>RHOV</i>               | -0,737 | 1,57E-05        |
| <i>ODF2</i>               | -0,738 | 1,85E-09        |
| <i>SASS6</i>              | -0,740 | 1,40E-06        |
| <i>CTD-<br/>3092A11.1</i> | -0,740 | 0,0198629<br>46 |
| <i>BRICD5</i>             | -0,740 | 0,0138520<br>34 |
| <i>PARPBP</i>             | -0,741 | 1,30E-05        |
| <i>ATP8B3</i>             | -0,741 | 3,20E-06        |
| <i>SLC25A10</i>           | -0,741 | 4,10E-11        |
| <i>CCDC15</i>             | -0,742 | 0,0090621<br>51 |
| <i>KIAA0101</i>           | -0,743 | 3,11E-05        |
| <i>PXN-AS1</i>            | -0,750 | 0,0155895<br>34 |
| <i>RP11-<br/>315D16.2</i> | -0,751 | 0,0049114<br>42 |
| <i>RAD54B</i>             | -0,751 | 0,0006052<br>3  |
| <i>PAK4</i>               | -0,752 | 2,06E-09        |
| <i>CDH24</i>              | -0,753 | 1,61E-05        |
| <i>PGP</i>                | -0,754 | 5,99E-06        |
| <i>MNX1</i>               | -0,754 | 7,14E-06        |
| <i>C1orf112</i>           | -0,754 | 0,0008499<br>36 |
| <i>HMGB3</i>              | -0,754 | 2,28E-05        |
| <i>PARP2</i>              | -0,758 | 1,95E-07        |
| <i>SP9</i>                | -0,758 | 0,0001043<br>55 |
| <i>KREMEN1</i>            | -0,759 | 0,0006363<br>5  |
| <i>JDP2</i>               | -0,759 | 0,0033366<br>9  |
| <i>CHEK2</i>              | -0,761 | 1,60E-08        |
| <i>CENPK</i>              | -0,761 | 0,0001329<br>11 |

|                       |        |                 |
|-----------------------|--------|-----------------|
| <i>AUNIP</i>          | -0,763 | 0,0001291<br>05 |
| <i>METRNL</i>         | -0,764 | 0,0003170<br>56 |
| <i>MYBL1</i>          | -0,764 | 0,0012293<br>2  |
| <i>TFAP2A</i>         | -0,766 | 0,0005372<br>82 |
| <i>HCN2</i>           | -0,766 | 0,0028270<br>6  |
| <i>TRIM59</i>         | -0,766 | 0,0012956<br>75 |
| <i>GLI2</i>           | -0,767 | 6,21E-05        |
| <i>CRABP2</i>         | -0,767 | 4,12E-06        |
| <i>CENPP</i>          | -0,768 | 2,83E-07        |
| <i>EFNA3</i>          | -0,771 | 4,52E-08        |
| <i>LINC00868</i>      | -0,772 | 0,0047083<br>42 |
| <i>DNA2</i>           | -0,773 | 0,0002051<br>25 |
| <i>CCHCR1</i>         | -0,774 | 2,94E-09        |
| <i>INAFM1</i>         | -0,776 | 0,0008736<br>7  |
| <i>NMB</i>            | -0,778 | 0,0019948<br>55 |
| <i>DOCK11</i>         | -0,779 | 0,0068362<br>47 |
| <i>MCM6</i>           | -0,779 | 5,11E-08        |
| <i>MCM3</i>           | -0,779 | 2,40E-07        |
| <i>CBR3-AS1</i>       | -0,781 | 0,0249958<br>66 |
| <i>RRM1</i>           | -0,781 | 1,85E-06        |
| <i>SOCS3</i>          | -0,782 | 0,0001259<br>67 |
| <i>EMC9</i>           | -0,782 | 2,22E-06        |
| <i>PRIM1</i>          | -0,782 | 1,45E-06        |
| <i>ANKRD9</i>         | -0,783 | 1,88E-06        |
| <i>RTTN</i>           | -0,784 | 0,0068362<br>37 |
| <i>WDHD1</i>          | -0,784 | 4,12E-06        |
| <i>RFC5</i>           | -0,786 | 4,66E-08        |
| <i>PASK</i>           | -0,786 | 1,72E-08        |
| <i>LMTK3</i>          | -0,788 | 0,0001356<br>19 |
| <i>POLR2J3</i>        | -0,788 | 0,0018627<br>8  |
| <i>RP11-386G11.10</i> | -0,788 | 8,79E-05        |
| <i>LRRC75A</i>        | -0,790 | 0,0009698<br>78 |
| <i>FAM222A</i>        | -0,791 | 0,0007069<br>36 |
| <i>TNNT1</i>          | -0,791 | 7,06E-09        |



|                 |        |                 |
|-----------------|--------|-----------------|
| <i>COX17</i>    | -0,793 | 3,44E-10        |
| <i>DLX4</i>     | -0,793 | 0,0002994<br>7  |
| <i>SH3BP1</i>   | -0,794 | 1,07E-06        |
| <i>PIM1</i>     | -0,795 | 9,92E-05        |
| <i>WDR24</i>    | -0,796 | 0,0002490<br>89 |
| <i>TMEM56</i>   | -0,797 | 0,0018354<br>52 |
| <i>RADIL</i>    | -0,797 | 0,0140541<br>94 |
| <i>B3GAT1</i>   | -0,800 | 6,61E-06        |
| <i>CYP27A1</i>  | -0,802 | 0,0098711<br>8  |
| <i>BCL2L2</i>   | -0,803 | 0,0200034<br>08 |
| <i>SLC29A4</i>  | -0,803 | 0,0486608<br>18 |
| <i>TTPA</i>     | -0,803 | 0,0014438<br>69 |
| <i>CSPG5</i>    | -0,803 | 0,0287238       |
| <i>REEP4</i>    | -0,804 | 6,91E-17        |
| <i>OVOS2</i>    | -0,807 | 0,0074828<br>88 |
| <i>LRRC20</i>   | -0,807 | 1,74E-08        |
| <i>PPP1R3G</i>  | -0,808 | 0,0447501<br>91 |
| <i>HMGB1</i>    | -0,810 | 1,71E-09        |
| <i>MIS18A</i>   | -0,810 | 0,0045223<br>27 |
| <i>NOS2</i>     | -0,810 | 0,0032159<br>87 |
| <i>ADAMTS15</i> | -0,810 | 4,67E-05        |
| <i>PRADC1</i>   | -0,811 | 9,36E-07        |
| <i>DNMT1</i>    | -0,812 | 3,17E-07        |
| <i>CDK2</i>     | -0,812 | 2,02E-12        |
| <i>MCM8</i>     | -0,813 | 2,69E-06        |
| <i>GPC2</i>     | -0,813 | 0,0349526<br>96 |
| <i>HELLS</i>    | -0,813 | 4,97E-07        |
| <i>POLE2</i>    | -0,813 | 0,0001215<br>07 |
| <i>SH3RF3</i>   | -0,814 | 0,0001660<br>36 |
| <i>CENPN</i>    | -0,815 | 1,23E-05        |
| <i>NLGN2</i>    | -0,816 | 7,15E-07        |
| <i>LMO7</i>     | -0,816 | 0,0011371<br>87 |
| <i>GPRIN1</i>   | -0,816 | 9,29E-10        |
| <i>SNTA1</i>    | -0,817 | 0,0067453<br>42 |
| <i>MTFR2</i>    | -0,818 | 1,02E-06        |

|                           |        |                 |
|---------------------------|--------|-----------------|
| <i>BOLA2B</i>             | -0,818 | 0,0039072<br>23 |
| <i>ATRNL1</i>             | -0,818 | 0,0022484<br>66 |
| <i>PLEKHA4</i>            | -0,819 | 0,0001325<br>31 |
| <i>RAD9A</i>              | -0,819 | 9,34E-09        |
| <i>FAM83D</i>             | -0,820 | 1,96E-11        |
| <i>NEMP1</i>              | -0,821 | 1,75E-09        |
| <i>SV2A</i>               | -0,821 | 7,36E-05        |
| <i>H2AFZ</i>              | -0,821 | 6,24E-05        |
| <i>RFC4</i>               | -0,822 | 2,27E-05        |
| <i>MTL5</i>               | -0,822 | 0,0046807<br>62 |
| <i>EEF1A2</i>             | -0,825 | 0,0030648<br>25 |
| <i>POU6F1</i>             | -0,826 | 0,0332677<br>06 |
| <i>TREX2</i>              | -0,827 | 7,24E-06        |
| <i>SPDL1</i>              | -0,827 | 6,69E-05        |
| <i>KCNQ2</i>              | -0,827 | 0,0239678<br>38 |
| <i>HAUS5</i>              | -0,827 | 6,38E-09        |
| <i>SALL2</i>              | -0,827 | 0,0140854<br>39 |
| <i>MAD2L1</i>             | -0,829 | 3,33E-07        |
| <i>FANCB</i>              | -0,829 | 0,0001111<br>23 |
| <i>RCCD1</i>              | -0,830 | 4,57E-13        |
| <i>ZNF367</i>             | -0,831 | 1,99E-05        |
| <i>GRK6</i>               | -0,832 | 9,68E-15        |
| <i>LIN7B</i>              | -0,833 | 0,0442800<br>23 |
| <i>AMH</i>                | -0,836 | 0,0025295<br>78 |
| <i>PLEKHH3</i>            | -0,836 | 3,08E-06        |
| <i>FN3KRP</i>             | -0,838 | 1,33E-12        |
| <i>RFC2</i>               | -0,838 | 6,98E-05        |
| <i>WDR90</i>              | -0,839 | 1,10E-05        |
| <i>RNF157</i>             | -0,841 | 0,0208742<br>57 |
| <i>CENPJ</i>              | -0,841 | 2,22E-08        |
| <i>ATP2C2</i>             | -0,841 | 0,0009585<br>29 |
| <i>PRKAR2B</i>            | -0,842 | 0,0021341<br>43 |
| <i>TMEM107</i>            | -0,843 | 2,81E-07        |
| <i>KIF23</i>              | -0,845 | 9,28E-09        |
| <i>H1FO</i>               | -0,845 | 1,04E-06        |
| <i>CTD-<br/>2033A16.3</i> | -0,848 | 0,0034194<br>84 |

|                           |        |                 |
|---------------------------|--------|-----------------|
| <i>SBK1</i>               | -0,849 | 0,0022399<br>24 |
| <i>DTYMK</i>              | -0,849 | 1,41E-06        |
| <i>FBXO5</i>              | -0,850 | 0,0001106<br>89 |
| <i>CHAF1B</i>             | -0,850 | 3,83E-05        |
| <i>AKAP2</i>              | -0,850 | 0,0274575<br>13 |
| <i>NSUN7</i>              | -0,851 | 0,0296300<br>56 |
| <i>STRIP2</i>             | -0,853 | 0,0034524<br>72 |
| <i>HYLS1</i>              | -0,854 | 1,49E-05        |
| <i>WASH4P</i>             | -0,857 | 0,0427723<br>42 |
| <i>SGOL2</i>              | -0,857 | 4,04E-05        |
| <i>FAM171A2</i>           | -0,857 | 0,0032280<br>18 |
| <i>HES4</i>               | -0,858 | 1,65E-05        |
| <i>BCAM</i>               | -0,858 | 2,67E-06        |
| <i>ABHD8</i>              | -0,859 | 3,16E-06        |
| <i>TNFRSF13C</i>          | -0,859 | 0,0350048<br>4  |
| <i>TAF5</i>               | -0,860 | 9,81E-08        |
| <i>ZNF519</i>             | -0,863 | 0,0005309<br>81 |
| <i>MEX3D</i>              | -0,863 | 7,36E-07        |
| <i>FOXL1</i>              | -0,864 | 7,12E-05        |
| <i>CPNE2</i>              | -0,864 | 2,40E-07        |
| <i>TCOF1</i>              | -0,866 | 1,83E-09        |
| <i>BRCA2</i>              | -0,866 | 1,61E-05        |
| <i>CEP128</i>             | -0,866 | 0,0002727<br>92 |
| <i>GOLGA6L7P</i>          | -0,868 | 0,0104824<br>45 |
| <i>MAD2L2</i>             | -0,869 | 6,78E-12        |
| <i>UQCC3</i>              | -0,869 | 2,10E-08        |
| <i>GNAO1</i>              | -0,869 | 2,51E-07        |
| <i>AUTS2</i>              | -0,870 | 0,0106082<br>84 |
| <i>UBL7-AS1</i>           | -0,872 | 0,0005832<br>03 |
| <i>ATAD5</i>              | -0,873 | 5,98E-06        |
| <i>HR</i>                 | -0,875 | 0,0004005<br>05 |
| <i>ARHGEF26</i>           | -0,877 | 0,0299209<br>32 |
| <i>RNF26</i>              | -0,877 | 4,36E-12        |
| <i>RP5-<br/>1120P11.1</i> | -0,879 | 0,0099497<br>86 |
| <i>MELK</i>               | -0,879 | 6,78E-07        |

|                            |        |                 |
|----------------------------|--------|-----------------|
| <i>SLC17A7</i>             | -0,880 | 0,0304777<br>55 |
| <i>GLTSCR1</i>             | -0,880 | 0,0165369<br>7  |
| <i>WDR76</i>               | -0,881 | 7,45E-05        |
| <i>RBL1</i>                | -0,881 | 6,53E-11        |
| <i>LHX1</i>                | -0,882 | 0,0006434<br>56 |
| <i>TSPAN15</i>             | -0,883 | 0,0007174<br>55 |
| <i>CCDC85C</i>             | -0,884 | 4,58E-07        |
| <i>IGFBP5</i>              | -0,885 | 0,0490860<br>22 |
| <i>FZD1</i>                | -0,885 | 5,45E-05        |
| <i>SLC2A4RG</i>            | -0,887 | 1,91E-06        |
| <i>WNT7B</i>               | -0,887 | 0,0428023<br>05 |
| <i>KIF20B</i>              | -0,889 | 9,16E-06        |
| <i>PKN3</i>                | -0,889 | 4,42E-08        |
| <i>CCDC18</i>              | -0,891 | 3,35E-05        |
| <i>NRARP</i>               | -0,892 | 1,91E-08        |
| <i>DSN1</i>                | -0,895 | 1,49E-11        |
| <i>KIAA1524</i>            | -0,896 | 7,60E-06        |
| <i>PHGDH</i>               | -0,897 | 3,54E-16        |
| <i>TRIM9</i>               | -0,898 | 3,15E-05        |
| <i>WRAP53</i>              | -0,899 | 7,15E-07        |
| <i>DCAF15</i>              | -0,900 | 3,13E-09        |
| <i>HOXC6</i>               | -0,900 | 0,0454228<br>2  |
| <i>NEMP2</i>               | -0,900 | 0,0212495<br>69 |
| <i>MDC1</i>                | -0,900 | 2,19E-12        |
| <i>STIL</i>                | -0,900 | 6,99E-09        |
| <i>PTTG1</i>               | -0,902 | 5,07E-11        |
| <i>GPR162</i>              | -0,904 | 0,0357416<br>59 |
| <i>LINC00899</i>           | -0,905 | 0,0060320<br>26 |
| <i>DPYSL5</i>              | -0,905 | 0,0045262<br>28 |
| <i>BRIP1</i>               | -0,908 | 1,77E-05        |
| <i>DEPDC1B</i>             | -0,908 | 2,96E-08        |
| <i>NUDT1</i>               | -0,908 | 2,09E-12        |
| <i>ARHGAP19-<br/>SLIT1</i> | -0,908 | 1,06E-06        |
| <i>PDX1</i>                | -0,909 | 7,03E-05        |
| <i>APBB1</i>               | -0,910 | 0,0091919<br>98 |
| <i>STAG3</i>               | -0,910 | 0,0451338<br>85 |
| <i>ZCCHC12</i>             | -0,910 | 0,0376233<br>99 |

|                            |        |                 |
|----------------------------|--------|-----------------|
| <i>UBE2T</i>               | -0,911 | 8,80E-10        |
| <i>RAP1GAP</i>             | -0,911 | 0,0163224<br>37 |
| <i>E2F8</i>                | -0,911 | 2,36E-05        |
| <i>GAS1</i>                | -0,913 | 0,0208818<br>32 |
| <i>WHSC1</i>               | -0,914 | 1,32E-12        |
| <i>MASTL</i>               | -0,916 | 3,56E-08        |
| <i>ATAD2</i>               | -0,917 | 2,79E-07        |
| <i>CCDC136</i>             | -0,917 | 0,0252142<br>6  |
| <i>MCM4</i>                | -0,918 | 5,09E-09        |
| <i>CH507-<br/>145C22.1</i> | -0,920 | 0,0056120<br>36 |
| <i>NRM</i>                 | -0,920 | 7,15E-12        |
| <i>CAMK4</i>               | -0,920 | 0,0071529<br>5  |
| <i>BMF</i>                 | -0,923 | 0,0068092<br>37 |
| <i>POLA2</i>               | -0,924 | 2,23E-13        |
| <i>NCAPD3</i>              | -0,926 | 2,51E-15        |
| <i>AKNA</i>                | -0,926 | 5,32E-08        |
| <i>RCN3</i>                | -0,926 | 0,0021618<br>73 |
| <i>ESCO2</i>               | -0,926 | 1,97E-07        |
| <i>CDKN3</i>               | -0,926 | 1,31E-09        |
| <i>TERT</i>                | -0,927 | 0,0016049<br>17 |
| <i>ORC6</i>                | -0,928 | 1,66E-07        |
| <i>USP18</i>               | -0,928 | 0,0024311<br>57 |
| <i>DUT</i>                 | -0,929 | 5,66E-11        |
| <i>DHFR</i>                | -0,929 | 1,38E-06        |
| <i>NPTX2</i>               | -0,935 | 1,59E-13        |
| <i>SAP30</i>               | -0,935 | 1,35E-10        |
| <i>ZGRF1</i>               | -0,936 | 1,90E-08        |
| <i>BARD1</i>               | -0,936 | 0,0003670<br>67 |
| <i>ATP1A3</i>              | -0,936 | 0,0010124<br>96 |
| <i>ARRB2</i>               | -0,937 | 3,11E-09        |
| <i>ID3</i>                 | -0,937 | 0,0136125<br>18 |
| <i>TIMELESS</i>            | -0,937 | 1,82E-09        |
| <i>THEMIS2</i>             | -0,937 | 7,62E-05        |
| <i>CENPU</i>               | -0,937 | 4,08E-07        |
| <i>KANK2</i>               | -0,939 | 6,00E-11        |
| <i>LMNB2</i>               | -0,940 | 2,90E-14        |
| <i>PHF19</i>               | -0,940 | 2,89E-09        |
| <i>TTK</i>                 | -0,941 | 1,15E-05        |
| <i>POLD1</i>               | -0,942 | 1,31E-11        |

|                           |        |                 |
|---------------------------|--------|-----------------|
| <i>ZNF724P</i>            | -0,942 | 0,0008168<br>43 |
| <i>CKLF-CMTM1</i>         | -0,942 | 0,0340423<br>79 |
| <i>KNTC1</i>              | -0,943 | 1,95E-05        |
| <i>DSCC1</i>              | -0,943 | 8,29E-07        |
| <i>IFI27L1</i>            | -0,943 | 7,62E-06        |
| <i>CLDN3</i>              | -0,943 | 0,0120949<br>18 |
| <i>HAUS4</i>              | -0,944 | 6,44E-05        |
| <i>PARM1</i>              | -0,947 | 0,0400432<br>66 |
| <i>FANCI</i>              | -0,949 | 3,43E-09        |
| <i>CARHSP1</i>            | -0,950 | 3,43E-09        |
| <i>UNC119</i>             | -0,951 | 0,0031923<br>12 |
| <i>IRF7</i>               | -0,951 | 2,23E-05        |
| <i>RACGAP1</i>            | -0,952 | 1,18E-11        |
| <i>POLE</i>               | -0,955 | 1,55E-09        |
| <i>MAP1A</i>              | -0,957 | 0,0351180<br>62 |
| <i>RRM2</i>               | -0,960 | 2,64E-07        |
| <i>DTL</i>                | -0,960 | 4,79E-07        |
| <i>SKA3</i>               | -0,962 | 6,05E-06        |
| <i>XRCC2</i>              | -0,962 | 1,47E-07        |
| <i>LIG1</i>               | -0,963 | 3,95E-13        |
| <i>ZWINT</i>              | -0,964 | 2,49E-07        |
| <i>RHEBL1</i>             | -0,964 | 1,48E-07        |
| <i>TLE2</i>               | -0,966 | 0,0267746<br>16 |
| <i>SAPCD1</i>             | -0,968 | 0,0352861<br>02 |
| <i>KIF18A</i>             | -0,969 | 5,42E-07        |
| <i>EPOR</i>               | -0,969 | 5,59E-06        |
| <i>UBALD2</i>             | -0,975 | 3,85E-16        |
| <i>C19orf68</i>           | -0,976 | 7,84E-05        |
| <i>PXMP2</i>              | -0,977 | 4,71E-09        |
| <i>LMCD1</i>              | -0,977 | 0,0307121<br>64 |
| <i>UBE2C</i>              | -0,978 | 1,90E-11        |
| <i>NCAPH2</i>             | -0,981 | 1,29E-07        |
| <i>C17orf53</i>           | -0,981 | 3,14E-07        |
| <i>CDK1</i>               | -0,982 | 1,38E-08        |
| <i>FBLN5</i>              | -0,983 | 0,0047093<br>22 |
| <i>CTD-<br/>2535L24.2</i> | -0,983 | 0,0253579<br>09 |
| <i>PLEKHG4</i>            | -0,986 | 0,0073402<br>59 |
| <i>AURKA</i>              | -0,987 | 2,10E-11        |
| <i>LMNB1</i>              | -0,987 | 5,72E-14        |

|                      |        |                 |
|----------------------|--------|-----------------|
| <i>VASH2</i>         | -0,988 | 0,0027483<br>43 |
| <i>SPATA3-AS1</i>    | -0,990 | 0,0377171<br>65 |
| <i>SUN2</i>          | -0,990 | 8,05E-14        |
| <i>SEMA6B</i>        | -0,990 | 0,0028453<br>46 |
| <i>KISS1R</i>        | -0,990 | 0,0069252<br>46 |
| <i>EXO1</i>          | -0,991 | 2,45E-06        |
| <i>FOXO6</i>         | -0,991 | 0,0007282<br>81 |
| <i>KIF11</i>         | -0,992 | 1,03E-09        |
| <i>OLMALINC</i>      | -0,993 | 0,0007929<br>76 |
| <i>HAUS8</i>         | -0,993 | 4,99E-07        |
| <i>ZP1</i>           | -0,999 | 0,0256408<br>82 |
| <i>KMT2E-AS1</i>     | -1,000 | 0,0068362<br>37 |
| <i>CDC6</i>          | -1,001 | 3,62E-08        |
| <i>TCF19</i>         | -1,003 | 3,85E-06        |
| <i>DDX11</i>         | -1,004 | 8,83E-19        |
| <i>CNTRL</i>         | -1,005 | 2,86E-06        |
| <i>MSH5</i>          | -1,006 | 3,40E-07        |
| <i>BRCA1</i>         | -1,007 | 7,76E-10        |
| <i>TMEM132E</i>      | -1,008 | 0,0001620<br>11 |
| <i>ACSBG1</i>        | -1,008 | 0,0037787<br>42 |
| <i>FANCA</i>         | -1,009 | 2,19E-12        |
| <i>TRIP13</i>        | -1,010 | 2,02E-12        |
| <i>TUBB4B</i>        | -1,010 | 1,44E-10        |
| <i>DIAPH3</i>        | -1,011 | 1,27E-09        |
| <i>SELM</i>          | -1,011 | 0,0268754<br>5  |
| <i>ARHGAP11B</i>     | -1,014 | 6,03E-10        |
| <i>PDZD4</i>         | -1,014 | 0,0258064<br>69 |
| <i>RP11-44M6.7</i>   | -1,015 | 0,0427708<br>53 |
| <i>LINC00634</i>     | -1,015 | 0,0137771<br>36 |
| <i>MIR210HG</i>      | -1,016 | 0,0010577<br>6  |
| <i>ASRGL1</i>        | -1,018 | 4,64E-05        |
| <i>NCK1-AS1</i>      | -1,018 | 3,05E-06        |
| <i>HMG2</i>          | -1,019 | 2,83E-07        |
| <i>RP11-154J22.1</i> | -1,019 | 0,0381027<br>01 |
| <i>ARTN</i>          | -1,020 | 0,0017361<br>99 |

|                      |        |             |
|----------------------|--------|-------------|
| <i>GIN54</i>         | -1,022 | 1,63E-05    |
| <i>PPDPF</i>         | -1,026 | 1,26E-09    |
| <i>RP11-445F12.1</i> | -1,027 | 1,98E-07    |
| <i>BUB1B</i>         | -1,027 | 9,17E-11    |
| <i>CLDN23</i>        | -1,027 | 0,029940134 |
| <i>RFX2</i>          | -1,031 | 0,00460624  |
| <i>CLSPN</i>         | -1,031 | 5,13E-06    |
| <i>PMF1-BGLAP</i>    | -1,032 | 0,000109863 |
| <i>RP11-798M19.6</i> | -1,034 | 0,003809184 |
| <i>CTSV</i>          | -1,038 | 1,53E-11    |
| <i>POLQ</i>          | -1,039 | 7,85E-08    |
| <i>HOXA6</i>         | -1,040 | 0,036572539 |
| <i>STARD8</i>        | -1,040 | 0,029985884 |
| <i>ATP2A3</i>        | -1,041 | 0,006313448 |
| <i>SYT7</i>          | -1,043 | 3,11E-05    |
| <i>KIF24</i>         | -1,044 | 1,45E-05    |
| <i>BCL2L12</i>       | -1,046 | 2,62E-06    |
| <i>NCAPG</i>         | -1,049 | 2,27E-08    |
| <i>CDCA2</i>         | -1,049 | 1,33E-09    |
| <i>SMC4</i>          | -1,051 | 3,04E-08    |
| <i>CENPF</i>         | -1,053 | 3,02E-07    |
| <i>CENPM</i>         | -1,057 | 8,31E-11    |
| <i>CENPH</i>         | -1,058 | 1,90E-13    |
| <i>MDK</i>           | -1,060 | 0,000737963 |
| <i>TUBA1B</i>        | -1,063 | 1,17E-14    |
| <i>ARHGAP11A</i>     | -1,064 | 3,57E-14    |
| <i>THAP10</i>        | -1,065 | 0,038195475 |
| <i>TPX2</i>          | -1,071 | 8,59E-13    |
| <i>RIBC2</i>         | -1,073 | 0,003098005 |
| <i>RAD51</i>         | -1,073 | 8,97E-11    |
| <i>MCM2</i>          | -1,077 | 2,69E-13    |
| <i>INCENP</i>        | -1,077 | 2,41E-15    |
| <i>SPA17</i>         | -1,077 | 5,90E-09    |
| <i>TONSL</i>         | -1,078 | 3,56E-08    |
| <i>UHRF1</i>         | -1,079 | 2,14E-05    |
| <i>TMEM145</i>       | -1,080 | 0,012523338 |
| <i>PLK4</i>          | -1,082 | 2,60E-14    |
| <i>CCNB1</i>         | -1,087 | 5,12E-15    |



|                      |        |                 |
|----------------------|--------|-----------------|
| <i>NUP62</i>         | -1,087 | 3,55E-05        |
| <i>GNG7</i>          | -1,088 | 3,84E-06        |
| <i>CTD-2574D22.2</i> | -1,088 | 0,0175889<br>53 |
| <i>SOWAHD</i>        | -1,089 | 0,0108677<br>67 |
| <i>SHCBP1</i>        | -1,089 | 2,05E-09        |
| <i>FOXD2</i>         | -1,092 | 0,0062316<br>14 |
| <i>FOXA2</i>         | -1,098 | 9,13E-05        |
| <i>YPEL4</i>         | -1,098 | 0,0113712<br>69 |
| <i>NDC80</i>         | -1,099 | 1,39E-08        |
| <i>CENPO</i>         | -1,100 | 2,05E-12        |
| <i>LZTS1</i>         | -1,109 | 0,0065446<br>87 |
| <i>HIRIP3</i>        | -1,113 | 7,49E-12        |
| <i>APOBEC3B</i>      | -1,114 | 1,56E-06        |
| <i>DEPDC1</i>        | -1,114 | 4,11E-10        |
| <i>BUB1</i>          | -1,115 | 5,14E-12        |
| <i>PPFIA4</i>        | -1,116 | 0,0002571<br>78 |
| <i>SNAI1</i>         | -1,116 | 8,47E-05        |
| <i>TMEM200B</i>      | -1,118 | 0,0002591<br>46 |
| <i>KIF26A</i>        | -1,118 | 0,0004506<br>06 |
| <i>GAS2L3</i>        | -1,119 | 7,93E-09        |
| <i>MYB</i>           | -1,119 | 0,0004359<br>66 |
| <i>FANCG</i>         | -1,119 | 2,41E-15        |
| <i>C18orf54</i>      | -1,120 | 4,95E-05        |
| <i>NEIL3</i>         | -1,121 | 4,29E-08        |
| <i>NCAPG2</i>        | -1,122 | 1,23E-14        |
| <i>BZRAP1</i>        | -1,122 | 0,0001889<br>55 |
| <i>ANLN</i>          | -1,123 | 1,13E-07        |
| <i>C16orf59</i>      | -1,124 | 2,83E-07        |
| <i>HES6</i>          | -1,125 | 4,97E-07        |
| <i>RAD51AP1</i>      | -1,126 | 1,63E-09        |
| <i>RP11-540D14.8</i> | -1,128 | 0,0130216<br>89 |
| <i>BMP8B</i>         | -1,128 | 2,46E-05        |
| <i>CENPI</i>         | -1,128 | 2,24E-09        |
| <i>SGOL1</i>         | -1,131 | 7,77E-08        |
| <i>PKMYT1</i>        | -1,132 | 6,22E-09        |
| <i>CCDC150</i>       | -1,133 | 5,38E-05        |
| <i>HPSE</i>          | -1,134 | 1,80E-08        |
| <i>POC1A</i>         | -1,135 | 1,50E-08        |

|                      |        |                 |
|----------------------|--------|-----------------|
| <i>SLC2A4</i>        | -1,136 | 0,0001815<br>28 |
| <i>CCDC163P</i>      | -1,140 | 0,0008686<br>29 |
| <i>IER5L</i>         | -1,143 | 3,40E-11        |
| <i>MCM7</i>          | -1,145 | 3,57E-14        |
| <i>BLM</i>           | -1,145 | 2,88E-08        |
| <i>RP11-480I12.5</i> | -1,146 | 0,0134302<br>04 |
| <i>CEP55</i>         | -1,146 | 4,35E-10        |
| <i>CHAF1A</i>        | -1,147 | 1,30E-09        |
| <i>CDC45</i>         | -1,148 | 1,38E-11        |
| <i>MCM10</i>         | -1,150 | 2,02E-09        |
| <i>HCG27</i>         | -1,151 | 0,0380296<br>54 |
| <i>CDKN2D</i>        | -1,151 | 0,0002350<br>43 |
| <i>ESPNP</i>         | -1,153 | 0,0022033<br>8  |
| <i>RP11-22B23.1</i>  | -1,154 | 1,14E-12        |
| <i>HJURP</i>         | -1,157 | 1,62E-09        |
| <i>CDH23</i>         | -1,160 | 0,0035045<br>27 |
| <i>ASF1B</i>         | -1,160 | 7,27E-08        |
| <i>ORC1</i>          | -1,161 | 2,19E-12        |
| <i>FGFR3</i>         | -1,163 | 6,55E-06        |
| <i>HMMR</i>          | -1,165 | 1,49E-11        |
| <i>CCNB2</i>         | -1,166 | 4,10E-16        |
| <i>KIF4A</i>         | -1,168 | 1,14E-08        |
| <i>NUSAP1</i>        | -1,170 | 1,99E-13        |
| <i>CASC5</i>         | -1,171 | 1,12E-10        |
| <i>FANCD2</i>        | -1,173 | 5,87E-12        |
| <i>CACNA1I</i>       | -1,174 | 0,0141024<br>58 |
| <i>CDCA5</i>         | -1,176 | 6,23E-11        |
| <i>ZNF492</i>        | -1,177 | 0,0287824<br>06 |
| <i>RP11-302M6.4</i>  | -1,178 | 0,0066880<br>72 |
| <i>RP5-991G20.1</i>  | -1,179 | 6,10E-05        |
| <i>C5orf34</i>       | -1,181 | 4,29E-06        |
| <i>MND1</i>          | -1,182 | 1,49E-09        |
| <i>CENPE</i>         | -1,182 | 1,72E-07        |
| <i>ZNF331</i>        | -1,183 | 3,81E-08        |
| <i>ESAM</i>          | -1,183 | 0,0118460<br>82 |
| <i>FAM72B</i>        | -1,184 | 0,0006445<br>77 |
| <i>EDAR</i>          | -1,185 | 1,92E-06        |
| <i>CCNF</i>          | -1,187 | 1,25E-11        |

|                 |        |                 |
|-----------------|--------|-----------------|
| <i>NOD2</i>     | -1,189 | 0,0025685<br>98 |
| <i>ENTPD8</i>   | -1,195 | 2,27E-06        |
| <i>NCAPD2</i>   | -1,197 | 1,39E-17        |
| <i>CHTF18</i>   | -1,201 | 3,50E-16        |
| <i>KIF15</i>    | -1,201 | 9,34E-10        |
| <i>DLL4</i>     | -1,203 | 0,0470218<br>38 |
| <i>TOP2A</i>    | -1,204 | 8,47E-11        |
| <i>TIGD3</i>    | -1,207 | 0,0356217<br>21 |
| <i>MCM5</i>     | -1,210 | 4,63E-12        |
| <i>PRRX2</i>    | -1,212 | 0,0035557<br>61 |
| <i>CORO1A</i>   | -1,212 | 0,0001361<br>02 |
| <i>GINS2</i>    | -1,214 | 3,66E-11        |
| <i>CARD8</i>    | -1,215 | 0,0006649<br>69 |
| <i>CCNA2</i>    | -1,215 | 2,12E-10        |
| <i>ENTPD2</i>   | -1,215 | 2,06E-06        |
| <i>CENPW</i>    | -1,221 | 3,80E-06        |
| <i>ZBTB12</i>   | -1,223 | 0,0048484<br>93 |
| <i>SHISA8</i>   | -1,223 | 0,0216526<br>43 |
| <i>TMPO-AS1</i> | -1,223 | 3,40E-07        |
| <i>SKA1</i>     | -1,225 | 4,51E-08        |
| <i>FA2H</i>     | -1,226 | 0,0333639<br>33 |
| <i>CDCA8</i>    | -1,232 | 3,95E-13        |
| <i>DUSP9</i>    | -1,237 | 0,0004453<br>06 |
| <i>DLGAP5</i>   | -1,239 | 5,12E-13        |
| <i>ALDOC</i>    | -1,240 | 1,70E-08        |
| <i>BHLHA15</i>  | -1,240 | 0,0114093<br>6  |
| <i>MXD3</i>     | -1,246 | 1,38E-26        |
| <i>MLXIPL</i>   | -1,249 | 0,0011371<br>87 |
| <i>RMI2</i>     | -1,251 | 4,86E-17        |
| <i>FAM110A</i>  | -1,252 | 1,62E-09        |
| <i>C19orf57</i> | -1,252 | 6,76E-06        |
| <i>TACC3</i>    | -1,252 | 5,93E-12        |
| <i>ASPM</i>     | -1,254 | 1,70E-11        |
| <i>SAPCD2</i>   | -1,256 | 1,58E-21        |
| <i>EME1</i>     | -1,257 | 1,43E-07        |
| <i>CKS1B</i>    | -1,262 | 1,38E-11        |
| <i>CABLES2</i>  | -1,263 | 1,96E-10        |
| <i>DBF4B</i>    | -1,266 | 1,93E-18        |
| <i>NUF2</i>     | -1,268 | 3,43E-12        |

|                   |        |                 |
|-------------------|--------|-----------------|
| <i>HMGB2</i>      | -1,268 | 3,37E-17        |
| <i>ARHGEF39</i>   | -1,268 | 2,03E-13        |
| <i>CDC20</i>      | -1,269 | 1,33E-13        |
| <i>PROCA1</i>     | -1,270 | 1,15E-05        |
| <i>WDR62</i>      | -1,270 | 6,06E-10        |
| <i>BIRC5</i>      | -1,273 | 5,27E-15        |
| <i>SOX18</i>      | -1,274 | 0,0412490<br>39 |
| <i>MAFA</i>       | -1,274 | 0,0158832<br>62 |
| <i>SGK494</i>     | -1,280 | 0,0291562<br>24 |
| <i>OIP5</i>       | -1,286 | 5,27E-15        |
| <i>PSMC3IP</i>    | -1,287 | 1,81E-11        |
| <i>AC037459.4</i> | -1,293 | 0,0324934<br>15 |
| <i>PRC1</i>       | -1,295 | 5,49E-16        |
| <i>PRR11</i>      | -1,298 | 8,37E-13        |
| <i>H2AFX</i>      | -1,299 | 1,62E-09        |
| <i>KIF22</i>      | -1,301 | 1,05E-18        |
| <i>MYBL2</i>      | -1,302 | 4,24E-16        |
| <i>NKX2-1</i>     | -1,304 | 9,05E-05        |
| <i>SPC25</i>      | -1,304 | 3,99E-11        |
| <i>ZBED1</i>      | -1,305 | 0,0221105<br>41 |
| <i>TRAIP</i>      | -1,306 | 5,44E-11        |
| <i>AC002116.7</i> | -1,306 | 0,0001342<br>38 |
| <i>CDC25C</i>     | -1,307 | 5,01E-14        |
| <i>NCAPH</i>      | -1,308 | 3,95E-13        |
| <i>TLX1</i>       | -1,315 | 2,61E-05        |
| <i>RTN4RL2</i>    | -1,328 | 2,32E-08        |
| <i>H1FX</i>       | -1,329 | 2,96E-15        |
| <i>DDX12P</i>     | -1,329 | 5,75E-15        |
| <i>CDKN1C</i>     | -1,332 | 0,0004604<br>51 |
| <i>MKI67</i>      | -1,333 | 1,96E-11        |
| <i>DRP2</i>       | -1,334 | 0,0033036<br>49 |
| <i>VAMP1</i>      | -1,336 | 1,34E-09        |
| <i>AP001347.6</i> | -1,336 | 0,0263182<br>79 |
| <i>MNS1</i>       | -1,340 | 0,0015198<br>6  |
| <i>FEN1</i>       | -1,344 | 8,89E-08        |
| <i>KIF14</i>      | -1,345 | 2,68E-10        |
| <i>AURKB</i>      | -1,350 | 2,74E-18        |
| <i>MPP2</i>       | -1,351 | 7,27E-09        |
| <i>CCL24</i>      | -1,352 | 0,0014276<br>96 |
| <i>CENPA</i>      | -1,357 | 1,90E-13        |

|                      |        |                 |
|----------------------|--------|-----------------|
| <i>CIT</i>           | -1,357 | 1,35E-10        |
| <i>VASN</i>          | -1,358 | 9,72E-10        |
| <i>RNASEH2A</i>      | -1,358 | 2,05E-15        |
| <i>GPR19</i>         | -1,359 | 0,0002005<br>33 |
| <i>KIAA0319</i>      | -1,361 | 0,0035219<br>67 |
| <i>RGMA</i>          | -1,363 | 0,0034499<br>74 |
| <i>PTPRH</i>         | -1,363 | 6,78E-05        |
| <i>TP73</i>          | -1,364 | 5,14E-08        |
| <i>KIF20A</i>        | -1,372 | 7,07E-21        |
| <i>ESPL1</i>         | -1,376 | 1,59E-16        |
| <i>C14orf80</i>      | -1,376 | 5,59E-10        |
| <i>RECQL4</i>        | -1,378 | 1,75E-16        |
| <i>FAM72D</i>        | -1,384 | 3,21E-08        |
| <i>PBK</i>           | -1,392 | 7,59E-16        |
| <i>KIF21B</i>        | -1,392 | 0,0045139<br>43 |
| <i>YPEL1</i>         | -1,394 | 4,07E-07        |
| <i>E2F1</i>          | -1,395 | 3,31E-16        |
| <i>RP11-57A19.2</i>  | -1,398 | 0,0041558<br>56 |
| <i>COL6A2</i>        | -1,398 | 0,0008505<br>15 |
| <i>GTSE1</i>         | -1,399 | 1,98E-16        |
| <i>RP11-958N24.2</i> | -1,404 | 0,0084849<br>35 |
| <i>RP11-360L9.4</i>  | -1,408 | 0,0071347<br>24 |
| <i>PLK1</i>          | -1,412 | 3,65E-18        |
| <i>DNMT3B</i>        | -1,413 | 1,61E-09        |
| <i>DDIAS</i>         | -1,414 | 0,0003109<br>57 |
| <i>C21orf58</i>      | -1,414 | 1,77E-11        |
| <i>CKAP2L</i>        | -1,416 | 1,11E-18        |
| <i>C2orf48</i>       | -1,418 | 8,93E-05        |
| <i>TK1</i>           | -1,421 | 4,10E-16        |
| <i>MUC3A</i>         | -1,423 | 4,90E-05        |
| <i>C1QL1</i>         | -1,427 | 3,23E-07        |
| <i>CDCA3</i>         | -1,432 | 5,12E-24        |
| <i>NEK2</i>          | -1,437 | 3,54E-16        |
| <i>MFNG</i>          | -1,437 | 0,0192216<br>98 |
| <i>XRCC3</i>         | -1,442 | 4,94E-14        |
| <i>LRP4-AS1</i>      | -1,444 | 0,0386037<br>76 |
| <i>ITGA2B</i>        | -1,447 | 0,0067567<br>73 |
| <i>FAM132B</i>       | -1,451 | 9,66E-05        |
| <i>FBLN1</i>         | -1,457 | 8,66E-06        |

|                     |        |                 |
|---------------------|--------|-----------------|
| <i>KIF2C</i>        | -1,461 | 3,94E-17        |
| <i>AC000068.5</i>   | -1,462 | 0,0343845<br>64 |
| <i>CDT1</i>         | -1,466 | 4,02E-13        |
| <i>SP8</i>          | -1,469 | 0,0181307<br>59 |
| <i>UBE2S</i>        | -1,470 | 5,36E-19        |
| <i>NEURL1B</i>      | -1,470 | 0,0006873<br>84 |
| <i>TICRR</i>        | -1,471 | 9,22E-10        |
| <i>IQGAP3</i>       | -1,474 | 5,79E-11        |
| <i>SLC30A3</i>      | -1,477 | 1,91E-09        |
| <i>HOXA-AS3</i>     | -1,485 | 0,0004892<br>46 |
| <i>YBX2</i>         | -1,493 | 6,88E-11        |
| <i>PSRC1</i>        | -1,497 | 3,92E-20        |
| <i>FAM64A</i>       | -1,501 | 6,88E-20        |
| <i>COL1A1</i>       | -1,504 | 2,66E-05        |
| <i>CD6</i>          | -1,505 | 0,0249487<br>36 |
| <i>KIFC1</i>        | -1,515 | 4,47E-18        |
| <i>NEURL1</i>       | -1,516 | 0,0378340<br>85 |
| <i>ARHGEF16</i>     | -1,517 | 4,68E-08        |
| <i>PIF1</i>         | -1,521 | 8,17E-19        |
| <i>E2F2</i>         | -1,524 | 9,22E-10        |
| <i>SOWAHA</i>       | -1,525 | 0,0191391<br>24 |
| <i>SPC24</i>        | -1,528 | 1,14E-15        |
| <i>ZNF821</i>       | -1,529 | 0,0325581<br>14 |
| <i>DERL3</i>        | -1,532 | 2,39E-10        |
| <i>SGSM1</i>        | -1,536 | 0,0330704<br>78 |
| <i>SERTAD4-AS1</i>  | -1,542 | 0,0045262<br>28 |
| <i>CH507-24F1.1</i> | -1,547 | 4,45E-05        |
| <i>PTGER4</i>       | -1,547 | 0,0174122<br>91 |
| <i>PACSIN1</i>      | -1,549 | 0,0149842<br>14 |
| <i>FOXM1</i>        | -1,549 | 3,75E-19        |
| <i>KIF18B</i>       | -1,549 | 7,07E-21        |
| <i>AC004381.6</i>   | -1,550 | 3,21E-09        |
| <i>CACNA1G</i>      | -1,555 | 0,0176929<br>01 |
| <i>HMX3</i>         | -1,560 | 0,0094161<br>61 |
| <i>RAD54L</i>       | -1,563 | 2,02E-18        |
| <i>RAB3D</i>        | -1,567 | 0,0104944<br>21 |
| <i>NRTN</i>         | -1,567 | 3,78E-05        |

|                      |        |                 |
|----------------------|--------|-----------------|
| <i>CACNA1H</i>       | -1,570 | 0,0004023<br>79 |
| <i>LIPE</i>          | -1,573 | 0,0003690<br>58 |
| <i>RDM1</i>          | -1,576 | 2,54E-14        |
| <i>NXPH4</i>         | -1,581 | 8,73E-19        |
| <i>TROAP</i>         | -1,582 | 1,36E-32        |
| <i>OAS3</i>          | -1,582 | 9,57E-08        |
| <i>SERTAD4</i>       | -1,583 | 3,85E-06        |
| <i>CSH2</i>          | -1,586 | 6,36E-14        |
| <i>ZNF511</i>        | -1,591 | 1,06E-08        |
| <i>CDH1</i>          | -1,592 | 1,11E-05        |
| <i>PTCHD2</i>        | -1,598 | 0,0330704<br>78 |
| <i>C2CD4C</i>        | -1,605 | 0,0030395<br>14 |
| <i>ATOH8</i>         | -1,609 | 0,0112258<br>74 |
| <i>CCDC74B</i>       | -1,609 | 0,0012485<br>54 |
| <i>EEF1E1P1</i>      | -1,613 | 0,0485655<br>9  |
| <i>COX6B2</i>        | -1,615 | 0,0396908<br>15 |
| <i>RNASE4</i>        | -1,623 | 0,0103538<br>26 |
| <i>RTKN2</i>         | -1,625 | 7,95E-09        |
| <i>CDKN2C</i>        | -1,631 | 6,69E-24        |
| <i>NMU</i>           | -1,631 | 5,44E-22        |
| <i>SPAG5</i>         | -1,631 | 2,27E-18        |
| <i>RP11-598P20.5</i> | -1,634 | 0,0403411<br>22 |
| <i>RP11-544I20.2</i> | -1,635 | 0,0278755<br>42 |
| <i>IL22RA1</i>       | -1,641 | 1,60E-12        |
| <i>MAPK8IP1</i>      | -1,650 | 1,51E-05        |
| <i>SUV39H1</i>       | -1,671 | 0,0006239<br>54 |
| <i>STMND1</i>        | -1,684 | 0,0001881<br>91 |
| <i>ERCC6L</i>        | -1,689 | 0,0381987<br>13 |
| <i>CABP1</i>         | -1,691 | 0,0094885<br>96 |
| <i>PCBP3</i>         | -1,697 | 0,0174440<br>75 |
| <i>CCDC121</i>       | -1,705 | 0,0137033<br>91 |
| <i>NRGN</i>          | -1,710 | 6,68E-22        |
| <i>TCAM1P</i>        | -1,721 | 0,0018685<br>83 |
| <i>INHBE</i>         | -1,734 | 0,0116897<br>97 |

|                            |        |                 |
|----------------------------|--------|-----------------|
| <i>CNTNAP2</i>             | -1,752 | 0,0008934<br>73 |
| <i>ARHGAP33</i>            | -1,809 | 1,02E-14        |
| <i>PALM3</i>               | -1,821 | 0,0007466<br>71 |
| <i>RP11-244M2.1</i>        | -1,841 | 6,36E-06        |
| <i>APOBEC3B-<br/>AS1</i>   | -1,851 | 0,0353405<br>87 |
| <i>HPCA</i>                | -1,882 | 0,0220308<br>24 |
| <i>KLHL32</i>              | -1,897 | 0,0381231<br>28 |
| <i>FXVD6</i>               | -1,907 | 9,05E-06        |
| <i>SLPI</i>                | -1,922 | 3,97E-06        |
| <i>LHX9</i>                | -1,935 | 0,0022849<br>95 |
| <i>FAM57B</i>              | -1,940 | 0,0016155<br>26 |
| <i>PTGDR2</i>              | -1,975 | 0,0187520<br>85 |
| <i>LCK</i>                 | -1,976 | 7,13E-08        |
| <i>AP000251.3</i>          | -1,981 | 0,0010861<br>39 |
| <i>IRF8</i>                | -2,010 | 0,0010818<br>2  |
| <i>NXPH3</i>               | -2,016 | 0,0043567<br>01 |
| <i>GLI1</i>                | -2,052 | 0,0097389<br>75 |
| <i>KIF4B</i>               | -2,087 | 0,0006801<br>93 |
| <i>ARHGAP19</i>            | -2,095 | 4,06E-05        |
| <i>RP11-160O5.1</i>        | -2,117 | 6,21E-05        |
| <i>CCM2L</i>               | -2,177 | 0,0088141<br>73 |
| <i>RP11-<br/>195F19.30</i> | -2,208 | 0,0010211<br>41 |
| <i>ZNF695</i>              | -2,223 | 1,71E-05        |
| <i>DMC1</i>                | -2,262 | 0,0033246<br>85 |
| <i>HPCAL4</i>              | -2,341 | 0,0013119<br>89 |
| <i>C2orf78</i>             | -2,842 | 3,27E-05        |
| <i>DMBX1</i>               | -3,310 | 2,49E-06        |



**Table S5: List of differentially regulated mRNAs**

| gene symbol          | log <sub>2</sub> fold change<br>(+DOX vs -DOX)<br>( <i>LINC01021</i> wt) | padj        | log <sub>2</sub> fold change<br>(+DOX vs -DOX)<br>( <i>LINC01021</i> KO) | padj        |
|----------------------|--------------------------------------------------------------------------|-------------|--------------------------------------------------------------------------|-------------|
| <i>NRGN</i>          | -1.123                                                                   | 1.95E-09    | -1.710                                                                   | 6.68E-22    |
| <i>MAPK8IP1</i>      | -0.353                                                                   | 0.652157466 | -1.650                                                                   | 1.51E-05    |
| <i>IL22RA1</i>       | -0.928                                                                   | 0.000279109 | -1.641                                                                   | 1.60E-12    |
| <i>CDKN2C</i>        | -0.988                                                                   | 7.17E-09    | -1.631                                                                   | 6.69E-24    |
| <i>TROAP</i>         | -1.004                                                                   | 8.81E-13    | -1.582                                                                   | 1.36E-32    |
| <i>NXPH4</i>         | -0.962                                                                   | 5.24E-07    | -1.581                                                                   | 8.73E-19    |
| <i>HOXA-AS3</i>      | -0.328                                                                   | 0.71225114  | -1.485                                                                   | 0.000489246 |
| <i>SLC30A3</i>       | -0.824                                                                   | 0.004376498 | -1.477                                                                   | 1.91E-09    |
| <i>PTPRH</i>         | -0.155                                                                   | 0.846732498 | -1.363                                                                   | 6.78E-05    |
| <i>VASN</i>          | -0.124                                                                   | 0.826005056 | -1.358                                                                   | 9.72E-10    |
| <i>VAMP1</i>         | -0.549                                                                   | 0.057494561 | -1.336                                                                   | 1.34E-09    |
| <i>DDX12P</i>        | -0.780                                                                   | 3.28E-05    | -1.329                                                                   | 5.75E-15    |
| <i>RTN4RL2</i>       | -0.595                                                                   | 0.048075346 | -1.328                                                                   | 2.32E-08    |
| <i>DBF4B</i>         | -0.800                                                                   | 2.46E-07    | -1.266                                                                   | 1.93E-18    |
| <i>CABLES2</i>       | -0.795                                                                   | 0.000235275 | -1.263                                                                   | 1.96E-10    |
| <i>EME1</i>          | -1.384                                                                   | 6.50E-09    | -1.257                                                                   | 1.43E-07    |
| <i>SAPCD2</i>        | -0.717                                                                   | 4.26E-07    | -1.256                                                                   | 1.58E-21    |
| <i>MXD3</i>          | -0.785                                                                   | 2.23E-10    | -1.246                                                                   | 1.38E-26    |
| <i>ALDOC</i>         | -0.250                                                                   | 0.563089131 | -1.240                                                                   | 1.70E-08    |
| <i>CHTF18</i>        | -0.750                                                                   | 2.54E-06    | -1.201                                                                   | 3.50E-16    |
| <i>ENTPD8</i>        | -0.437                                                                   | 0.261446985 | -1.195                                                                   | 2.27E-06    |
| <i>RP11-22B23.1</i>  | -0.661                                                                   | 0.000310442 | -1.154                                                                   | 1.14E-12    |
| <i>ESPNP</i>         | -0.187                                                                   | 0.835603109 | -1.153                                                                   | 0.00220338  |
| <i>IER5L</i>         | -0.544                                                                   | 0.009645146 | -1.143                                                                   | 3.40E-11    |
| <i>BMP8B</i>         | -0.433                                                                   | 0.312355726 | -1.128                                                                   | 2.46E-05    |
| <i>INCENP</i>        | -0.640                                                                   | 1.66E-05    | -1.077                                                                   | 2.41E-15    |
| <i>RP11-445F12.1</i> | -0.107                                                                   | 0.842183945 | -1.027                                                                   | 1.98E-07    |
| <i>SUN2</i>          | -0.568                                                                   | 0.000116367 | -0.990                                                                   | 8.05E-14    |
| <i>CTD-2535L24.2</i> | 0.163                                                                    | 0.870534266 | -0.983                                                                   | 0.025357909 |
| <i>C19orf68</i>      | -0.393                                                                   | 0.309495167 | -0.976                                                                   | 7.84E-05    |
| <i>UNC119</i>        | 0.354                                                                    | 0.536887179 | -0.951                                                                   | 0.003192312 |
| <i>LMNB2</i>         | -0.518                                                                   | 0.000182831 | -0.940                                                                   | 2.90E-14    |
| <i>KANK2</i>         | -0.385                                                                   | 0.037662817 | -0.939                                                                   | 6.00E-11    |
| <i>THEMIS2</i>       | -0.276                                                                   | 0.526509943 | -0.937                                                                   | 7.62E-05    |
| <i>AKNA</i>          | -0.437                                                                   | 0.049156954 | -0.926                                                                   | 5.32E-08    |
| <i>NUDT1</i>         | -0.476                                                                   | 0.001502967 | -0.908                                                                   | 2.09E-12    |
| <i>GPR162</i>        | -0.060                                                                   | 0.957671811 | -0.904                                                                   | 0.035741659 |
| <i>PHGDH</i>         | -0.544                                                                   | 4.75E-06    | -0.897                                                                   | 3.54E-16    |
| <i>PKN3</i>          | -0.450                                                                   | 0.025979604 | -0.889                                                                   | 4.42E-08    |
| <i>CCDC85C</i>       | -0.290                                                                   | 0.30393861  | -0.884                                                                   | 4.58E-07    |
| <i>GNAO1</i>         | -0.263                                                                   | 0.329903932 | -0.869                                                                   | 2.51E-07    |
| <i>UQCC3</i>         | -0.364                                                                   | 0.083399991 | -0.869                                                                   | 2.10E-08    |
| <i>ABHD8</i>         | -0.104                                                                   | 0.827812144 | -0.859                                                                   | 3.16E-06    |

|                      |        |             |        |             |
|----------------------|--------|-------------|--------|-------------|
| <i>BCAM</i>          | -0.345 | 0.199391451 | -0.858 | 2.67E-06    |
| <i>CTD-2033A16.3</i> | 0.098  | 0.895455629 | -0.848 | 0.003419484 |
| <i>GRK6</i>          | -0.427 | 0.000466142 | -0.832 | 9.68E-15    |
| <i>RCCD1</i>         | -0.492 | 0.000109999 | -0.830 | 4.57E-13    |
| <i>MTFR2</i>         | -1.003 | 2.44E-09    | -0.818 | 1.02E-06    |
| <i>NLGN2</i>         | -0.332 | 0.155875687 | -0.816 | 7.15E-07    |
| <i>SH3RF3</i>        | -0.246 | 0.540583963 | -0.814 | 0.000166036 |
| <i>REEP4</i>         | -0.534 | 2.54E-07    | -0.804 | 6.91E-17    |
| <i>COX17</i>         | -0.466 | 0.001250141 | -0.793 | 3.44E-10    |
| <i>TNNT1</i>         | -0.390 | 0.020254112 | -0.791 | 7.06E-09    |
| <i>LRRC75A</i>       | -0.238 | 0.620314963 | -0.790 | 0.000969878 |
| <i>POLR2J3</i>       | -0.138 | 0.819384481 | -0.788 | 0.00186278  |
| <i>EMC9</i>          | -0.379 | 0.089376875 | -0.782 | 2.22E-06    |
| <i>CBR3-AS1</i>      | -0.135 | 0.878761578 | -0.781 | 0.024995866 |
| <i>CCHCR1</i>        | -0.419 | 0.006937078 | -0.774 | 2.94E-09    |
| <i>EFNA3</i>         | -0.405 | 0.020254087 | -0.771 | 4.52E-08    |
| <i>SP9</i>           | -0.330 | 0.27454922  | -0.758 | 0.000104355 |
| <i>MNX1</i>          | -0.243 | 0.398226537 | -0.754 | 7.14E-06    |
| <i>PAK4</i>          | -0.384 | 0.011569447 | -0.752 | 2.06E-09    |
| <i>ATP8B3</i>        | -0.209 | 0.456281245 | -0.741 | 3.20E-06    |
| <i>ODF2</i>          | -0.388 | 0.008172864 | -0.738 | 1.85E-09    |
| <i>RHOV</i>          | -0.481 | 0.02595027  | -0.737 | 1.57E-05    |
| <i>RP13-672B3.2</i>  | -0.337 | 0.412445203 | -0.735 | 0.002799422 |
| <i>LMO2</i>          | -0.371 | 0.00017249  | -0.725 | 8.98E-17    |
| <i>SSBP3</i>         | -0.406 | 0.011261912 | -0.724 | 5.07E-08    |
| <i>AC253572.1</i>    | 0.185  | 0.807879209 | -0.714 | 0.039648048 |
| <i>SNHG19</i>        | 0.001  | 0.998715579 | -0.712 | 8.65E-07    |
| <i>RP11-77K12.1</i>  | 0.301  | 0.642905052 | -0.702 | 0.041829482 |
| <i>ARID5A</i>        | -0.287 | 0.252416219 | -0.696 | 2.24E-05    |
| <i>CKB</i>           | -0.131 | 0.527560506 | -0.693 | 7.23E-11    |
| <i>KCNK5</i>         | -0.307 | 0.036342857 | -0.689 | 1.55E-09    |
| <i>THRA</i>          | -0.193 | 0.431830384 | -0.681 | 1.06E-06    |
| <i>C11orf84</i>      | -0.347 | 0.009407828 | -0.673 | 9.17E-10    |
| <i>TCF7</i>          | -0.322 | 0.022467784 | -0.672 | 2.79E-09    |
| <i>CLASRP</i>        | -0.202 | 0.209973032 | -0.671 | 1.12E-10    |
| <i>PBX1</i>          | -0.137 | 0.818553849 | -0.664 | 0.011129802 |
| <i>C16orf93</i>      | -0.251 | 0.547019929 | -0.661 | 0.004500798 |
| <i>NABP2</i>         | -0.440 | 2.56E-05    | -0.651 | 1.02E-11    |
| <i>PER1</i>          | -0.018 | 0.97507512  | -0.651 | 0.002269845 |
| <i>SP6</i>           | -0.143 | 0.757623355 | -0.650 | 0.001984904 |
| <i>DOT1L</i>         | -0.183 | 0.488778294 | -0.649 | 9.61E-06    |
| <i>PRR34-AS1</i>     | 0.028  | 0.972329967 | -0.648 | 0.032320863 |
| <i>KLHL25</i>        | -0.391 | 0.018603408 | -0.645 | 1.32E-06    |
| <i>SLX4</i>          | -0.243 | 0.366111198 | -0.634 | 0.000139111 |
| <i>CROCCP2_2</i>     | -0.090 | 0.871857391 | -0.627 | 0.004383209 |
| <i>DCXR</i>          | -0.166 | 0.650682761 | -0.627 | 0.000582894 |
| <i>THOC6</i>         | -0.299 | 0.026103248 | -0.616 | 8.44E-09    |

|                |        |             |        |             |
|----------------|--------|-------------|--------|-------------|
| CCDC9          | -0.290 | 0.143480245 | -0.615 | 1.18E-05    |
| CROCCP2_1      | -0.096 | 0.840631677 | -0.614 | 0.001634172 |
| PAFAH1B3       | -0.258 | 0.080614241 | -0.607 | 2.88E-08    |
| PIGS           | -0.135 | 0.64128938  | -0.599 | 2.00E-05    |
| LIN9           | -0.745 | 8.08E-09    | -0.598 | 3.72E-06    |
| RP11-1212A22.1 | 0.155  | 0.567706606 | -0.597 | 2.27E-05    |
| PTMS           | -0.217 | 0.22586937  | -0.588 | 7.25E-07    |
| TAF13          | 0.145  | 0.707418412 | 0.584  | 0.001240222 |
| BTG1           | 0.138  | 0.705672548 | 0.595  | 0.000491225 |
| ZNF181         | 0.209  | 0.385590141 | 0.598  | 3.68E-05    |
| ZNF674         | 0.037  | 0.96021239  | 0.610  | 0.024987735 |
| CD58           | 0.156  | 0.682862145 | 0.615  | 0.000858143 |
| MMAA           | 0.167  | 0.747015397 | 0.618  | 0.011122394 |
| ZNF613         | -0.163 | 0.799651535 | 0.620  | 0.032952807 |
| HMGA2          | 0.211  | 0.458416988 | 0.622  | 0.000150885 |
| CROT           | 0.294  | 0.345734312 | 0.634  | 0.001320667 |
| ZNF440         | 0.129  | 0.794362823 | 0.644  | 0.003598011 |
| AP1S3          | 0.220  | 0.540353654 | 0.649  | 0.000768686 |
| IMPACT         | 0.266  | 0.258138941 | 0.655  | 2.48E-05    |
| RNF182         | 0.014  | 0.98169573  | 0.658  | 0.000958529 |
| MT-ATP8        | 0.302  | 0.007020342 | 0.663  | 9.49E-13    |
| CAV2           | 0.267  | 0.354005712 | 0.667  | 0.000186513 |
| TAB3           | 0.435  | 0.000655661 | 0.671  | 3.12E-09    |
| TEX9           | -0.074 | 0.92391339  | 0.679  | 0.026318279 |
| SNAP23         | 0.356  | 0.040260532 | 0.681  | 7.89E-07    |
| SQRDL          | 0.333  | 0.363612867 | 0.690  | 0.002265639 |
| LIPA           | 0.358  | 0.057008837 | 0.691  | 2.27E-06    |
| TM7SF3         | 0.503  | 1.65E-08    | 0.693  | 1.79E-16    |
| CSNK1G1        | 0.488  | 4.95E-06    | 0.706  | 1.16E-12    |
| ZNF23          | -0.052 | 0.918218251 | 0.710  | 7.24E-05    |
| RIOK3          | 0.371  | 0.044905154 | 0.717  | 8.67E-07    |
| ZNF585A        | 0.122  | 0.852521572 | 0.718  | 0.010553768 |
| MOSPD1         | 0.249  | 0.124373317 | 0.719  | 3.24E-10    |
| AP1S2          | 0.143  | 0.603112661 | 0.726  | 7.07E-08    |
| SLC38A6        | 0.318  | 0.159121466 | 0.732  | 2.35E-06    |
| SDSL           | 0.258  | 0.565886421 | 0.751  | 0.001914476 |
| FAM221A        | 0.263  | 0.587125137 | 0.777  | 0.00223056  |
| KLF6           | 0.237  | 0.360593608 | 0.781  | 4.51E-07    |
| ZNF30          | 0.302  | 0.413075006 | 0.783  | 0.000336305 |
| CYB5R2         | 0.300  | 0.356036007 | 0.785  | 4.78E-05    |
| LYRM5          | 0.258  | 0.165232834 | 0.788  | 5.24E-10    |
| CERS5          | 0.575  | 9.55E-05    | 0.798  | 3.12E-09    |
| PERP           | 0.317  | 0.104864035 | 0.801  | 1.71E-08    |
| TMEM106B       | 0.433  | 0.005539122 | 0.803  | 1.21E-09    |
| WDR72          | 0.222  | 0.586276687 | 0.809  | 0.000132139 |
| RP13-463N16.6  | 0.227  | 0.594426637 | 0.812  | 0.000241341 |
| BIRC2          | 0.283  | 0.146215652 | 0.815  | 1.57E-09    |

|                      |        |             |       |             |
|----------------------|--------|-------------|-------|-------------|
| <i>TCEAL1</i>        | 0.328  | 0.21917555  | 0.818 | 4.23E-06    |
| <i>TRNP1</i>         | 0.724  | 9.41E-10    | 0.823 | 3.47E-13    |
| <i>CHURC1</i>        | 0.295  | 0.294205602 | 0.834 | 2.65E-06    |
| <i>RORA</i>          | 0.145  | 0.848020221 | 0.842 | 0.008957324 |
| <i>GABARAPL1</i>     | 0.554  | 0.000172356 | 0.851 | 1.74E-10    |
| <i>SP140L</i>        | 0.071  | 0.92103905  | 0.871 | 0.000958529 |
| <i>LPCAT2</i>        | 0.426  | 0.052342075 | 0.879 | 2.83E-07    |
| <i>MTRNR2L12</i>     | -0.104 | 0.928776469 | 0.887 | 0.037722861 |
| <i>NACAP1</i>        | -0.067 | 0.932040523 | 0.887 | 0.002122135 |
| <i>PABPC3</i>        | 0.133  | 0.878380584 | 0.887 | 0.015550326 |
| <i>RP11-421F16.3</i> | 0.512  | 0.00115133  | 0.894 | 5.40E-11    |
| <i>TMBIM4_1</i>      | 0.160  | 0.800695116 | 0.905 | 0.000842653 |
| <i>IKBIP</i>         | 0.495  | 3.96E-05    | 0.916 | 2.47E-17    |
| <i>LYPLAL1</i>       | 0.348  | 0.191449472 | 0.932 | 2.32E-07    |
| <i>NEURL2</i>        | 0.104  | 0.927629755 | 0.942 | 0.026724013 |
| <i>ANXA4</i>         | 0.635  | 5.32E-06    | 0.969 | 5.54E-14    |
| <i>NR2F1</i>         | 0.468  | 0.042811257 | 0.973 | 4.58E-08    |
| <i>BLOC1S2</i>       | 0.567  | 0.003124342 | 0.975 | 3.11E-09    |
| <i>SLC16A2</i>       | 0.470  | 0.042873486 | 0.987 | 4.18E-08    |
| <i>C15orf52</i>      | 0.940  | 2.68E-18    | 1.001 | 2.66E-21    |
| <i>CCNE1</i>         | 0.750  | 4.87E-08    | 1.001 | 4.73E-15    |
| <i>PUS3</i>          | 0.483  | 0.066797861 | 1.013 | 4.42E-07    |
| <i>ADAM23</i>        | 0.639  | 0.005601723 | 1.022 | 2.20E-07    |
| <i>TRIAP1</i>        | 0.448  | 0.082443016 | 1.051 | 4.72E-08    |
| <i>PTP4A1</i>        | 0.627  | 0.00082935  | 1.070 | 1.11E-10    |
| <i>CPEB2</i>         | 0.389  | 0.656286738 | 1.072 | 0.012447201 |
| <i>PLK2</i>          | 0.721  | 1.31E-07    | 1.079 | 4.86E-17    |
| <i>ETS1</i>          | 0.518  | 0.039351136 | 1.090 | 3.63E-08    |
| <i>PLAU</i>          | 0.556  | 0.043400516 | 1.117 | 1.36E-07    |
| <i>HGSNAT</i>        | 0.767  | 0.000295421 | 1.127 | 2.23E-09    |
| <i>SERPINE2</i>      | 0.489  | 0.002156135 | 1.165 | 5.56E-18    |
| <i>FAS</i>           | 0.656  | 7.35E-05    | 1.166 | 3.09E-15    |
| <i>TSC22D1</i>       | 0.666  | 1.89E-05    | 1.170 | 1.76E-16    |
| <i>CEP170P1</i>      | -0.238 | 0.829412856 | 1.171 | 0.013586991 |
| <i>SDCBP2</i>        | 0.068  | 0.951154282 | 1.192 | 0.001898289 |
| <i>SPTBN5</i>        | 0.990  | 3.77E-07    | 1.203 | 3.00E-11    |
| <i>PTPRZ1</i>        | 0.647  | 0.544608989 | 1.207 | 0.04343326  |
| <i>NLRP3</i>         | 0.501  | 0.330872844 | 1.208 | 0.000161344 |
| <i>THNSL1</i>        | 0.041  | 0.972584153 | 1.213 | 0.004088068 |
| <i>NLRP1</i>         | 0.937  | 1.17E-06    | 1.259 | 3.96E-12    |
| <i>GULP1</i>         | 0.736  | 0.000614096 | 1.259 | 2.74E-11    |
| <i>CAV1</i>          | 0.276  | 0.511492721 | 1.266 | 9.45E-09    |
| <i>CTSB</i>          | 0.905  | 2.48E-08    | 1.284 | 7.99E-17    |
| <i>SOCS2</i>         | 0.780  | 0.004234742 | 1.306 | 1.28E-08    |
| <i>PMAIP1</i>        | 0.492  | 0.009720426 | 1.316 | 6.72E-18    |
| <i>DDX60L</i>        | 0.763  | 0.043400516 | 1.331 | 5.71E-06    |
| <i>HPGD</i>          | 0.625  | 0.062240712 | 1.361 | 1.11E-07    |

|                     |        |             |       |             |
|---------------------|--------|-------------|-------|-------------|
| <i>CD163L1</i>      | 0.943  | 0.000219269 | 1.412 | 7.80E-10    |
| <i>ITGB8</i>        | 0.609  | 0.110259301 | 1.413 | 4.80E-07    |
| <i>AC006369.2</i>   | -0.382 | 0.791799704 | 1.431 | 0.034399157 |
| <i>GADD45A</i>      | 1.010  | 5.62E-10    | 1.444 | 7.07E-21    |
| <i>PORCN</i>        | 1.047  | 3.24E-06    | 1.471 | 2.19E-12    |
| <i>URGCP-MRPS24</i> | -0.414 | 0.579675525 | 1.484 | 0.000201784 |
| <i>EDN1</i>         | 0.859  | 0.008486943 | 1.491 | 6.29E-08    |
| <i>CDH13</i>        | 1.071  | 1.66E-19    | 1.567 | 8.76E-43    |
| <i>TIGAR</i>        | 1.089  | 1.41E-08    | 1.581 | 2.04E-18    |
| <i>AFF3</i>         | -0.239 | 0.881760856 | 1.596 | 0.013586991 |
| <i>TGFB2</i>        | 0.394  | 0.690702535 | 1.650 | 0.000808911 |
| <i>SLC6A12</i>      | 2.266  | 6.36E-05    | 1.763 | 0.009249002 |
| <i>BIRC3</i>        | 0.684  | 0.132418039 | 1.779 | 3.61E-08    |
| <i>ADRB2</i>        | -0.175 | 0.913945793 | 1.837 | 0.00477735  |
| <i>GJB3</i>         | 1.406  | 0.00037985  | 1.907 | 7.75E-08    |
| <i>DRAM1</i>        | 1.848  | 5.58E-24    | 2.096 | 3.87E-32    |
| <i>RPS27L</i>       | 1.958  | 1.35E-54    | 2.254 | 4.20E-73    |
| <i>FDXR</i>         | 2.032  | 4.11E-47    | 2.262 | 2.43E-59    |
| <i>PLTP</i>         | 1.388  | 0.004750381 | 2.293 | 5.34E-08    |
| <i>RP11-529A4.4</i> | 1.322  | 0.023168324 | 2.385 | 2.66E-07    |
| <i>DDX47</i>        | 0.576  | 0.476541631 | 2.401 | 4.12E-07    |
| <i>TSPAN1</i>       | 1.847  | 1.45E-07    | 2.477 | 9.23E-15    |
| <i>CTGF</i>         | 1.896  | 3.12E-09    | 2.624 | 9.13E-19    |
| <i>AK5</i>          | 1.116  | 0.058113727 | 2.756 | 8.64E-10    |
| <i>FLG-AS1</i>      | 2.342  | 6.23E-26    | 2.989 | 4.14E-43    |
| <i>DKK1</i>         | 1.833  | 2.09E-09    | 3.120 | 1.42E-27    |
| <i>DQX1</i>         | 2.077  | 0.00039358  | 3.267 | 6.29E-11    |
| <i>KRTAP3-1</i>     | 2.090  | 2.25E-08    | 3.286 | 7.40E-22    |
| <i>KRTAP2-3</i>     | 3.584  | 0.000853193 | 5.306 | 2.52E-08    |

**Table S6: List of differentially regulated transcript isoforms**

| Transcript name   | Transcript ID   | log <sub>2</sub> fold<br>change<br>(+DOX vs –<br>DOX)<br>( <i>LINC01021</i><br>wt) | padj    | log <sub>2</sub> fold<br>change<br>(+DOX vs –<br>DOX)<br>( <i>LINC01021</i><br>KO) | padj    |
|-------------------|-----------------|------------------------------------------------------------------------------------|---------|------------------------------------------------------------------------------------|---------|
| <i>MSH6_16</i>    | ENST00000614496 | -0,43339                                                                           | 0,70928 | -4,29743                                                                           | 0,00000 |
| <i>YWHAQ_5</i>    | ENST00000446619 | 1,08790                                                                            | 0,26409 | -2,53626                                                                           | 0,00047 |
| <i>RDX_22</i>     | ENST00000530131 | 1,20652                                                                            | 0,19273 | -2,22225                                                                           | 0,00429 |
| <i>SPTBN2_2</i>   | ENST00000533211 | 1,88280                                                                            | 0,00177 | -1,36160                                                                           | 0,05264 |
| <i>OSBPL8_5</i>   | ENST00000393250 | 1,39029                                                                            | 0,03064 | -1,62705                                                                           | 0,01077 |
| <i>SRCAP_3</i>    | ENST00000262518 | 0,01524                                                                            | 0,99225 | -2,86245                                                                           | 0,00000 |
| <i>MBTPS1_11</i>  | ENST00000569770 | 1,01225                                                                            | 0,32175 | -1,78789                                                                           | 0,03189 |
| <i>FARSA_10</i>   | ENST00000592662 | 0,68174                                                                            | 0,20555 | -2,08728                                                                           | 0,00000 |
| <i>MYO18A_1</i>   | ENST00000533112 | 0,48524                                                                            | 0,71196 | -2,28361                                                                           | 0,00134 |
| <i>SPINT1_10</i>  | ENST00000563656 | 1,16047                                                                            | 0,06074 | -1,60403                                                                           | 0,00515 |
| <i>RPS24_16</i>   | ENST00000482069 | 0,58736                                                                            | 0,42275 | -2,11183                                                                           | 0,00001 |
| <i>JPT2_10</i>    | ENST00000561516 | 1,27369                                                                            | 0,10954 | -1,42269                                                                           | 0,07010 |
| <i>BMP7_9</i>     | ENST00000450594 | 0,24220                                                                            | 0,85618 | -2,43356                                                                           | 0,00003 |
| <i>ATP5MG_7</i>   | ENST00000529770 | 0,71131                                                                            | 0,39863 | -1,94784                                                                           | 0,00088 |
| <i>SH3GL1_5</i>   | ENST00000417295 | 0,68274                                                                            | 0,38352 | -1,82375                                                                           | 0,00097 |
| <i>FABP5P7_1</i>  |                 | 0,99026                                                                            | 0,18899 | -1,49408                                                                           | 0,02426 |
| <i>RPN2_7</i>     | ENST00000462163 | 0,66130                                                                            | 0,39606 | -1,75319                                                                           | 0,00117 |
| <i>PQBP1_12</i>   | ENST00000376563 | 1,43828                                                                            | 0,01331 | -0,96360                                                                           | 0,17345 |
| <i>NIFK_4</i>     | ENST00000498570 | 1,71267                                                                            | 0,00028 | -0,54817                                                                           | 0,43734 |
| <i>PTPA_24</i>    | ENST00000355007 | 1,24548                                                                            | 0,01044 | -0,99918                                                                           | 0,07476 |
| <i>CLK2_4</i>     | ENST00000368361 | 0,52637                                                                            | 0,51239 | -1,70737                                                                           | 0,00131 |
| <i>FOSL2_3</i>    | ENST00000436647 | 0,40891                                                                            | 0,67488 | -1,81061                                                                           | 0,00067 |
| <i>ARHGAP12_7</i> | ENST00000375245 | 1,19682                                                                            | 0,01168 | -1,01653                                                                           | 0,05731 |
| <i>CTDSP2_2</i>   | ENST00000548823 | 0,90445                                                                            | 0,02439 | -1,29594                                                                           | 0,00044 |
| <i>ACVR1B_7</i>   | ENST00000542485 | 1,05744                                                                            | 0,05884 | -1,13292                                                                           | 0,04357 |
| <i>UFC1_5</i>     | ENST00000483191 | 0,63789                                                                            | 0,28805 | -1,54477                                                                           | 0,00033 |
| <i>ARHGAP5_3</i>  | ENST00000396582 | 0,70881                                                                            | 0,35296 | -1,46923                                                                           | 0,01128 |
| <i>ARHGAP5_7</i>  | ENST00000556611 | 0,91774                                                                            | 0,15730 | -1,24415                                                                           | 0,03933 |
| <i>ZFAND3_1</i>   | ENST00000373391 | 1,84486                                                                            | 0,00003 | -0,30740                                                                           | 0,69636 |
| <i>ACTG1_4</i>    | ENST00000570382 | 0,65688                                                                            | 0,26755 | -1,48092                                                                           | 0,00120 |
| <i>DHCR7_11</i>   | ENST00000531364 | 0,15689                                                                            | 0,90438 | -1,97017                                                                           | 0,00019 |
| <i>RPL29_2</i>    | ENST00000475248 | 0,50072                                                                            | 0,23716 | -1,62439                                                                           | 0,00000 |
| <i>P4HB_9</i>     | ENST00000574914 | 1,39449                                                                            | 0,00549 | -0,70603                                                                           | 0,29004 |
| <i>PSMB10_3</i>   | ENST00000570985 | 0,95354                                                                            | 0,13449 | -1,12259                                                                           | 0,07116 |
| <i>HDGF_10</i>    | ENST00000469145 | 0,50879                                                                            | 0,52184 | -1,52612                                                                           | 0,00352 |
| <i>WDR6_11</i>    | ENST00000610967 | 1,35577                                                                            | 0,00138 | -0,64601                                                                           | 0,24265 |
| <i>RPS27A_5</i>   | ENST00000402285 | 0,30422                                                                            | 0,63702 | -1,69290                                                                           | 0,00000 |
| <i>ENO2_9</i>     | ENST00000541477 | 0,88080                                                                            | 0,17635 | -1,10657                                                                           | 0,06971 |

|                    |                 |          |         |          |         |
|--------------------|-----------------|----------|---------|----------|---------|
| <i>PML_21</i>      | ENST00000435786 | 1,05721  | 0,01112 | -0,92709 | 0,04475 |
| <i>TMEM94_23</i>   | ENST00000579208 | 0,59785  | 0,28709 | -1,36782 | 0,00150 |
| <i>RACK1_24</i>    | ENST00000506312 | 0,65842  | 0,01560 | -1,27711 | 0,00000 |
| <i>FAM72A_3</i>    | ENST00000367128 | -0,00869 | 0,99308 | -1,93365 | 0,00000 |
| <i>CLK1_15</i>     | ENST00000409403 | 0,31066  | 0,67222 | -1,58210 | 0,00010 |
| <i>LUC7L2_4</i>    | ENST00000435096 | 0,33614  | 0,70830 | -1,55072 | 0,00143 |
| <i>PLEKHA8_8</i>   | ENST00000449726 | 1,57364  | 0,00002 | -0,31043 | 0,63450 |
| <i>ANAPC5_17</i>   | ENST00000541887 | 0,86462  | 0,00291 | -0,99932 | 0,00105 |
| <i>LBH_5</i>       | ENST00000406087 | 1,39733  | 0,00386 | -0,45761 | 0,52879 |
| <i>ERI3_2</i>      | ENST00000452396 | 0,73232  | 0,17515 | -1,09412 | 0,02169 |
| <i>CRABP2_3</i>    | ENST00000368221 | 0,20309  | 0,77924 | -1,60762 | 0,00000 |
| <i>DLG3_7</i>      | ENST00000489733 | 1,31118  | 0,00214 | -0,48885 | 0,40523 |
| <i>UQCR11_1</i>    | ENST00000593264 | -0,38205 | 0,61964 | -2,17052 | 0,00000 |
| <i>DDX3X_17</i>    | ENST00000642597 | 0,47598  | 0,43157 | -1,31202 | 0,00136 |
| <i>MAVS_2</i>      | ENST00000416600 | 0,66316  | 0,28255 | -1,10301 | 0,03136 |
| <i>RNF167_16</i>   | ENST00000575111 | 0,77995  | 0,06445 | -0,98376 | 0,01279 |
| <i>APPL1_9</i>     | ENST00000482800 | -0,06848 | 0,95396 | -1,78433 | 0,00005 |
| <i>FLNA_18</i>     | ENST00000369850 | 2,22888  | 0,00000 | 0,52852  | 0,28844 |
| <i>POLR2F_10</i>   | ENST00000651769 | 0,16841  | 0,80725 | -1,52508 | 0,00000 |
| <i>CFL1_9</i>      | ENST00000527344 | 0,06752  | 0,94779 | -1,59135 | 0,00001 |
| <i>ERBB3_15</i>    | ENST00000415288 | 0,36994  | 0,61408 | -1,27519 | 0,00423 |
| <i>CDK2_3</i>      | ENST00000354056 | -0,12536 | 0,87195 | -1,76169 | 0,00000 |
| <i>CTNNB1_8</i>    | ENST00000645982 | 1,26313  | 0,00001 | -0,34892 | 0,44824 |
| <i>OAZ1_1</i>      | ENST00000581150 | 0,14433  | 0,76038 | -1,46254 | 0,00000 |
| <i>RPL36_7</i>     | ENST00000579649 | -0,25709 | 0,74052 | -1,85128 | 0,00000 |
| <i>FBXO28_2</i>    | ENST00000424254 | 1,44173  | 0,00002 | -0,15117 | 0,82113 |
| <i>ATP2B1_6</i>    | ENST00000428670 | 0,86434  | 0,00007 | -0,72769 | 0,00352 |
| <i>SC5D_7</i>      | ENST00000527762 | -0,00759 | 0,99522 | -1,57367 | 0,00005 |
| <i>RPL37A_9</i>    | ENST00000456586 | 0,46569  | 0,30341 | -1,08482 | 0,00154 |
| <i>STOML2_5</i>    | ENST00000452248 | 0,57719  | 0,10730 | -0,96042 | 0,00255 |
| <i>TMEM120A_14</i> | ENST00000439537 | 1,73209  | 0,00000 | 0,19774  | 0,73101 |
| <i>INO80_1</i>     | ENST00000558357 | 0,58054  | 0,10469 | -0,94887 | 0,00289 |
| <i>ATP5F1E_2</i>   | ENST00000395663 | 0,08971  | 0,90445 | -1,43439 | 0,00000 |
| <i>USF2_9</i>      | ENST00000379134 | 0,87870  | 0,00847 | -0,64021 | 0,10353 |
| <i>SLC2A1_1</i>    | ENST00000415851 | 0,65710  | 0,07408 | -0,84680 | 0,01731 |
| <i>SEC23A_8</i>    | ENST00000545328 | 0,82644  | 0,01936 | -0,66493 | 0,09627 |
| <i>PARD3_5</i>     | ENST00000374790 | 0,65018  | 0,04626 | -0,83808 | 0,00806 |
| <i>TM9SF1_3</i>    | ENST00000524835 | 0,50481  | 0,29645 | -0,94321 | 0,01494 |
| <i>ACTN4_2</i>     | ENST00000424234 | 0,68666  | 0,01633 | -0,74645 | 0,01260 |
| <i>FAM91A1_2</i>   | ENST00000521166 | 0,82151  | 0,03308 | -0,58789 | 0,19234 |
| <i>DUT_2</i>       | ENST00000558472 | 0,51756  | 0,04330 | -0,85079 | 0,00023 |
| <i>HECTD1_17</i>   | ENST00000399332 | 0,78173  | 0,00000 | -0,56355 | 0,00479 |
| <i>GOLGB1_3</i>    | ENST00000393667 | 1,07582  | 0,00000 | -0,25335 | 0,46741 |
| <i>GMPPA_10</i>    | ENST00000373908 | 0,26391  | 0,50645 | -1,04625 | 0,00002 |
| <i>CIC_8</i>       | ENST00000160740 | -0,60417 | 0,04724 | -1,90635 | 0,00000 |
| <i>POLR2F_13</i>   | ENST00000492213 | 0,11114  | 0,88129 | -1,14571 | 0,00026 |
| <i>EEF1A1_8</i>    | ENST00000488500 | 1,05196  | 0,00081 | -0,20076 | 0,72181 |

|                      |                 |          |         |          |         |
|----------------------|-----------------|----------|---------|----------|---------|
| <i>PSME3_10</i>      | ENST00000589469 | 0,82316  | 0,00116 | -0,41782 | 0,21188 |
| <i>BSG_6</i>         | ENST00000573216 | 0,19509  | 0,74603 | -1,02950 | 0,00111 |
| <i>SRP54_14</i>      | ENST00000555557 | 0,50950  | 0,06863 | -0,71194 | 0,00722 |
| <i>RPL8_6</i>        | ENST00000533397 | 0,24992  | 0,58581 | -0,96515 | 0,00046 |
| <i>LYN_4</i>         | ENST00000519728 | 1,04157  | 0,00039 | -0,16172 | 0,77348 |
| <i>KIF2A_4</i>       | ENST00000401507 | -0,00798 | 0,99125 | -1,20393 | 0,00000 |
| <i>ADNP_3</i>        | ENST00000396032 | -0,24264 | 0,54606 | -1,43610 | 0,00000 |
| <i>NHP2_4</i>        | ENST00000314397 | 0,47393  | 0,03858 | -0,71321 | 0,00066 |
| <i>GORASP1_11</i>    | ENST00000452389 | 0,29578  | 0,50442 | -0,88762 | 0,00239 |
| <i>RN7SL1_1</i>      |                 | 0,34908  | 0,19482 | -0,83236 | 0,00009 |
| <i>AC022966.1_24</i> | ENST00000312010 | 1,02809  | 0,00000 | -0,15312 | 0,70214 |
| <i>NAB1_6</i>        | ENST00000409581 | 0,50763  | 0,09382 | -0,59078 | 0,04459 |
| <i>CLINT1_4</i>      | ENST00000523908 | 0,47236  | 0,07004 | -0,62034 | 0,01297 |
| <i>UBB_1</i>         | ENST00000535788 | 0,18931  | 0,61374 | -0,88120 | 0,00004 |
| <i>BCYRN1_1</i>      |                 | 0,28933  | 0,50304 | -0,77457 | 0,00819 |
| <i>RERE_17</i>       | ENST00000400908 | 0,54418  | 0,04843 | -0,49800 | 0,09577 |
| <i>LEF1_2</i>        | ENST00000438313 | 0,31851  | 0,40232 | -0,71983 | 0,01080 |
| <i>NSUN2_5</i>       | ENST00000506139 | 0,29042  | 0,40570 | -0,71449 | 0,00419 |
| <i>SARS1_3</i>       | ENST00000477544 | 0,53878  | 0,06357 | -0,46569 | 0,13890 |
| <i>ZNF646_2</i>      | ENST00000300850 | 0,55563  | 0,02092 | -0,44006 | 0,11083 |
| <i>HSF2_2</i>        | ENST00000368455 | 0,32128  | 0,29770 | -0,67410 | 0,00553 |
| <i>ABR_8</i>         | ENST00000572585 | 0,54098  | 0,00984 | -0,44448 | 0,06406 |
| <i>AAMP_2</i>        | ENST00000248450 | 0,21829  | 0,57957 | -0,75272 | 0,00203 |
| <i>OSBPL9_25</i>     | ENST00000531828 | 0,48365  | 0,05420 | -0,48579 | 0,06598 |
| <i>RN7SL2_1</i>      |                 | 0,24078  | 0,34976 | -0,71966 | 0,00006 |
| <i>STK38L_4</i>      | ENST00000536093 | 0,34458  | 0,25809 | -0,57437 | 0,02175 |
| <i>MAN2A2_5</i>      | ENST00000560451 | 0,73294  | 0,00000 | -0,18020 | 0,35733 |
| <i>ACTG1_1</i>       | ENST00000644774 | 0,09793  | 0,85073 | -0,80903 | 0,00061 |
| <i>MBTD1_3</i>       | ENST00000586178 | 0,62136  | 0,00249 | -0,26203 | 0,37212 |
| <i>ACTR3_8</i>       | ENST00000443297 | -0,02511 | 0,96233 | -0,90000 | 0,00000 |
| <i>PRRC2A_6</i>      | ENST00000376033 | 0,23545  | 0,43536 | -0,61337 | 0,00360 |
| <i>HNRNPL_3</i>      | ENST00000221419 | -0,16531 | 0,64083 | -0,98406 | 0,00000 |
| <i>RPS9_10</i>       | ENST00000626547 | 0,29405  | 0,22550 | -0,50811 | 0,01269 |
| <i>RPS2_2</i>        | ENST00000533161 | 0,31062  | 0,22741 | -0,49135 | 0,02666 |
| <i>POLR2L_1</i>      | ENST00000534030 | 0,12496  | 0,76558 | -0,67578 | 0,00168 |
| <i>SNHG19_1</i>      | ENST00000563192 | 0,02846  | 0,95321 | -0,77117 | 0,00001 |
| <i>CNTROB_7</i>      | ENST00000380262 | -0,17306 | 0,55576 | -0,96260 | 0,00000 |
| <i>EIF4G1_26</i>     | ENST00000346169 | 0,00632  | 0,99133 | -0,77067 | 0,00002 |
| <i>TKT_12</i>        | ENST00000450814 | 0,27729  | 0,12949 | -0,49631 | 0,00182 |
| <i>ARID1A_10</i>     | ENST00000324856 | 0,14921  | 0,63494 | -0,60579 | 0,00100 |
| <i>RPL27A_2</i>      | ENST00000526562 | 0,18543  | 0,51323 | -0,56933 | 0,00220 |
| <i>KHSRP_9</i>       | ENST00000619396 | 0,14814  | 0,65747 | -0,57129 | 0,00358 |
| <i>STIP1_7</i>       | ENST00000538945 | 0,06540  | 0,85497 | -0,64338 | 0,00004 |
| <i>SLK_4</i>         | ENST00000369755 | 0,06047  | 0,88426 | -0,63795 | 0,00022 |
| <i>MIEF1_13</i>      | ENST00000433117 | 0,31824  | 0,11953 | -0,37809 | 0,05756 |
| <i>NPM1_10</i>       | ENST00000523339 | 0,02934  | 0,95054 | -0,66351 | 0,00011 |
| <i>LUC7L3_21</i>     | ENST00000504065 | 0,33332  | 0,05028 | -0,32623 | 0,06995 |



|                   |                 |          |         |          |         |
|-------------------|-----------------|----------|---------|----------|---------|
| <i>BCOR_7</i>     | ENST00000378444 | -0,27778 | 0,20261 | -0,92919 | 0,00000 |
| <i>DAZAP1_9</i>   | ENST00000592453 | -0,36828 | 0,01749 | -0,94285 | 0,00000 |
| <i>KDM5C_6</i>    | ENST00000404049 | 0,04083  | 0,90432 | -0,53270 | 0,00008 |
| <i>ATN1_3</i>     | ENST00000396684 | 0,06070  | 0,83534 | -0,49512 | 0,00020 |
| <i>COX5A_4</i>    | ENST00000564811 | 0,16559  | 0,29770 | -0,38948 | 0,00105 |
| <i>ACTN4_8</i>    | ENST00000588618 | 0,36556  | 0,00024 | -0,17049 | 0,21806 |
| <i>PLXNB2_5</i>   | ENST00000359337 | 1,08729  | 0,00000 | 0,59102  | 0,00000 |
| <i>PTMS_5</i>     | ENST00000309083 | -0,14940 | 0,40542 | -0,61979 | 0,00000 |
| <i>U2AF2_1</i>    | ENST00000450554 | 0,02737  | 0,91514 | -0,39010 | 0,00010 |
| <i>LRPPRC_1</i>   | ENST00000260665 | 0,22385  | 0,01590 | 0,56756  | 0,00000 |
| <i>RPL4_10</i>    | ENST00000564439 | 0,00204  | 0,99522 | 0,46097  | 0,00007 |
| <i>SERP1_6</i>    | ENST00000239944 | -0,11200 | 0,47798 | 0,37792  | 0,00022 |
| <i>CCNC_16</i>    | ENST00000520429 | -0,07943 | 0,71694 | 0,41683  | 0,00036 |
| <i>TEAD1_1</i>    | ENST00000526600 | -0,30235 | 0,00741 | 0,20927  | 0,12847 |
| <i>DDR1_46</i>    | ENST00000452441 | 0,16654  | 0,36749 | 0,67929  | 0,00000 |
| <i>PLS3_1</i>     | ENST00000539310 | -0,07964 | 0,77160 | 0,44662  | 0,00141 |
| <i>MTATP8P1_1</i> |                 | 0,18255  | 0,32418 | 0,74439  | 0,00000 |
| <i>TXNDC9_5</i>   | ENST00000264255 | -0,13023 | 0,61740 | 0,45176  | 0,00440 |
| <i>CD109_3</i>    | ENST00000287097 | 0,02860  | 0,94110 | 0,61932  | 0,00002 |
| <i>B2M_8</i>      | ENST00000544417 | -0,35194 | 0,00762 | 0,24058  | 0,13565 |
| <i>NAB1_7</i>     | ENST00000337386 | -0,30009 | 0,03940 | 0,34642  | 0,01919 |
| <i>BIRC2_8</i>    | ENST00000227758 | 0,25291  | 0,10667 | 0,90218  | 0,00000 |
| <i>H3-3B_1</i>    | ENST00000593254 | -0,24154 | 0,23839 | 0,44743  | 0,00803 |
| <i>CRYZ_7</i>     | ENST00000340866 | -0,13027 | 0,69455 | 0,56888  | 0,00233 |
| <i>IMPDH1_17</i>  | ENST00000348127 | -0,47647 | 0,02171 | 0,27710  | 0,27776 |
| <i>RAB11A_3</i>   | ENST00000564910 | -0,17299 | 0,56141 | 0,59531  | 0,00131 |
| <i>SUMO1_2</i>    | ENST00000392244 | -0,59388 | 0,00007 | 0,17547  | 0,46372 |
| <i>AHR_4</i>      | ENST00000242057 | -0,07002 | 0,89014 | 0,74565  | 0,00038 |
| <i>NR2F2_5</i>    | ENST00000421109 | 0,09221  | 0,85026 | 0,91949  | 0,00002 |
| <i>SNX10_8</i>    | ENST00000338523 | -0,52964 | 0,01329 | 0,31211  | 0,25376 |
| <i>NPEPPS_22</i>  | ENST00000530514 | -0,18278 | 0,54840 | 0,66348  | 0,00055 |
| <i>NOLC1_8</i>    | ENST00000603946 | -0,39245 | 0,00097 | 0,45779  | 0,00031 |
| <i>LETMD1_31</i>  | ENST00000262055 | -0,04130 | 0,94423 | 0,82613  | 0,00013 |
| <i>RHOC_19</i>    | ENST00000468093 | 0,22889  | 0,48616 | 1,09700  | 0,00000 |
| <i>HUWE1_2</i>    | ENST00000612484 | -0,34750 | 0,19163 | 0,54751  | 0,01919 |
| <i>RNMT_9</i>     | ENST00000383314 | -0,38816 | 0,16461 | 0,51236  | 0,04820 |
| <i>RTL10_3</i>    | ENST00000407472 | -0,13610 | 0,71887 | 0,77087  | 0,00009 |
| <i>NOL7_2</i>     | ENST00000474485 | -0,46284 | 0,03674 | 0,44748  | 0,06177 |
| <i>ATP5F1B_4</i>  | ENST00000552959 | -0,11219 | 0,79886 | 0,80712  | 0,00014 |
| <i>C1orf43_10</i> | ENST00000350592 | -0,21866 | 0,46179 | 0,70140  | 0,00033 |
| <i>INTS13_7</i>   | ENST00000538155 | -0,42437 | 0,12172 | 0,49877  | 0,06444 |
| <i>FASTKD2_4</i>  | ENST00000236980 | -0,22142 | 0,50367 | 0,70580  | 0,00119 |
| <i>SPATA13_12</i> | ENST00000382095 | -0,30059 | 0,03472 | 0,63853  | 0,00000 |
| <i>RASSF8_6</i>   | ENST00000541490 | -0,42377 | 0,09806 | 0,51989  | 0,03964 |
| <i>CHMP4A_4</i>   | ENST00000530996 | -0,14821 | 0,73921 | 0,80649  | 0,00059 |
| <i>MPDU1_21</i>   | ENST00000396501 | -0,36123 | 0,22894 | 0,59811  | 0,02013 |
| <i>MTPAP_5</i>    | ENST00000488290 | -0,23076 | 0,56961 | 0,73504  | 0,00464 |

|                     |                 |          |         |         |         |
|---------------------|-----------------|----------|---------|---------|---------|
| <i>ITM2B_9</i>      | ENST00000648898 | -0,07599 | 0,89186 | 0,89743 | 0,00007 |
| <i>NPC2_6</i>       | ENST00000555619 | -0,17177 | 0,65219 | 0,81155 | 0,00016 |
| <i>DLG1_20</i>      | ENST00000659716 | 1,08990  | 0,00000 | 2,09255 | 0,00000 |
| <i>SEPTIN8_6</i>    | ENST00000378706 | -0,56241 | 0,05668 | 0,45565 | 0,17887 |
| <i>IVNS1ABP_1</i>   | ENST00000367498 | -0,57522 | 0,03550 | 0,45026 | 0,15039 |
| <i>NUP153_1</i>     | ENST00000262077 | -0,36513 | 0,29761 | 0,67175 | 0,01849 |
| <i>GOSR2_8</i>      | ENST00000640051 | -0,10440 | 0,84921 | 0,93711 | 0,00013 |
| <i>LGALS8_7</i>     | ENST00000323938 | -0,24577 | 0,49571 | 0,79707 | 0,00076 |
| <i>RACK1_3</i>      | ENST00000511473 | -0,26496 | 0,30772 | 0,80186 | 0,00002 |
| <i>SLC6A6_8</i>     | ENST00000622186 | -0,11425 | 0,76509 | 0,97466 | 0,00000 |
| <i>CLDN12_13</i>    | ENST00000394605 | -0,52775 | 0,03823 | 0,58673 | 0,02546 |
| <i>MSH6_7</i>       | ENST00000445503 | -0,41023 | 0,02389 | 0,70606 | 0,00003 |
| <i>FHOD3_5</i>      | ENST00000592930 | -0,41812 | 0,12164 | 0,71385 | 0,00179 |
| <i>LEPROTL1_2</i>   | ENST00000321250 | -0,71244 | 0,00887 | 0,43712 | 0,19340 |
| <i>MBNL1_4</i>      | ENST00000463374 | -0,66739 | 0,00440 | 0,49196 | 0,08050 |
| <i>SAMD4A_12</i>    | ENST00000554335 | -0,63323 | 0,00523 | 0,54450 | 0,03524 |
| <i>AC006064.6_1</i> | ENST00000646322 | -0,03527 | 0,95228 | 1,14690 | 0,00000 |
| <i>DLD_14</i>       | ENST00000415325 | -0,31818 | 0,22741 | 0,88466 | 0,00001 |
| <i>DEK_1</i>        | ENST00000651992 | -0,80713 | 0,00516 | 0,42049 | 0,27873 |
| <i>WDR77_1</i>      | ENST00000449340 | -0,16489 | 0,78204 | 1,07397 | 0,00027 |
| <i>RNF13_11</i>     | ENST00000361785 | -0,04216 | 0,96207 | 1,20202 | 0,00016 |
| <i>EPCAM_3</i>      | ENST00000490733 | -0,78836 | 0,00523 | 0,46998 | 0,19290 |
| <i>OFD1_1</i>       | ENST00000380550 | -0,18064 | 0,78675 | 1,08207 | 0,00138 |
| <i>ALAS1_3</i>      | ENST00000310271 | -0,31622 | 0,55163 | 0,95224 | 0,00634 |
| <i>RAN_8</i>        | ENST00000541630 | -0,52858 | 0,00065 | 0,75103 | 0,00000 |
| <i>ALDH3A2_15</i>   | ENST00000176643 | -0,77807 | 0,02306 | 0,51198 | 0,22294 |
| <i>SDC1_3</i>       | ENST00000381150 | -0,36787 | 0,47136 | 0,93573 | 0,00805 |
| <i>MYO5A_13</i>     | ENST00000356338 | -0,43937 | 0,32175 | 0,87830 | 0,00977 |
| <i>ZNF302_10</i>    | ENST00000505365 | -0,22519 | 0,61001 | 1,10141 | 0,00001 |
| <i>ENOPH1_3</i>     | ENST00000509635 | -0,33378 | 0,47825 | 1,03938 | 0,00090 |
| <i>DNAJC10_7</i>    | ENST00000491074 | 0,25297  | 0,57256 | 1,63180 | 0,00000 |
| <i>TMBIM4_5</i>     | ENST00000633367 | -0,39197 | 0,33467 | 1,00029 | 0,00058 |
| <i>HSF2_3</i>       | ENST00000452194 | -0,40624 | 0,44454 | 0,98606 | 0,00927 |
| <i>FMR1_18</i>      | ENST00000440235 | -0,95340 | 0,00750 | 0,44053 | 0,37171 |
| <i>MYO1B_8</i>      | ENST00000392316 | -0,31757 | 0,53955 | 1,08300 | 0,00097 |
| <i>SMARCA4_1_1</i>  | ENST00000354268 | -0,54624 | 0,17965 | 0,85792 | 0,01775 |
| <i>MAPK11_3</i>     | ENST00000330651 | -0,35047 | 0,49730 | 1,06868 | 0,00157 |
| <i>NEK1_6</i>       | ENST00000510533 | -1,11335 | 0,00180 | 0,31001 | 0,59750 |
| <i>USP9X_4</i>      | ENST00000324545 | -0,43251 | 0,32226 | 1,00057 | 0,00245 |
| <i>PSMC5_18</i>     | ENST00000375812 | -0,87704 | 0,00006 | 0,56477 | 0,03170 |
| <i>ZCCHC14_3</i>    | ENST00000268616 | -0,08973 | 0,92833 | 1,36575 | 0,00045 |
| <i>RRBP1_6</i>      | ENST00000360807 | -0,77240 | 0,01465 | 0,69420 | 0,04829 |
| <i>ZFP90_17</i>     | ENST00000398253 | -0,36717 | 0,53636 | 1,10015 | 0,00488 |
| <i>INTS6_17</i>     | ENST00000497989 | -0,53575 | 0,18701 | 0,93654 | 0,00720 |
| <i>SON_19</i>       | ENST00000436227 | -0,93071 | 0,00025 | 0,55082 | 0,09347 |
| <i>METTL26_2</i>    | ENST00000301686 | -0,57487 | 0,05482 | 0,91090 | 0,00080 |
| <i>AMZ2_2</i>       | ENST00000392720 | -0,21437 | 0,75128 | 1,28718 | 0,00020 |

|                   |                 |          |         |         |         |
|-------------------|-----------------|----------|---------|---------|---------|
| <i>ATP6AP2_20</i> | ENST00000447485 | 0,21998  | 0,69803 | 1,73302 | 0,00000 |
| <i>URI1_12</i>    | ENST00000360605 | -0,07617 | 0,87048 | 1,44144 | 0,00000 |
| <i>EDRF1_6</i>    | ENST00000356792 | -0,74698 | 0,05130 | 0,78599 | 0,04940 |
| <i>MYL12B_5</i>   | ENST00000400175 | -1,19873 | 0,00088 | 0,33431 | 0,56751 |
| <i>STX16_12</i>   | ENST00000371132 | -0,46133 | 0,25873 | 1,07179 | 0,00067 |
| <i>C5orf24_1</i>  | ENST00000504727 | -0,40868 | 0,54154 | 1,16265 | 0,00891 |
| <i>NXN_4</i>      | ENST00000571684 | -0,26363 | 0,73670 | 1,32962 | 0,00167 |
| <i>NAT1_5</i>     | ENST00000520546 | -0,88523 | 0,04667 | 0,71830 | 0,15262 |
| <i>RPL37_4</i>    | ENST00000509877 | -0,29019 | 0,67067 | 1,32090 | 0,00060 |
| <i>HDAC8_23</i>   | ENST00000373573 | -0,76907 | 0,03613 | 0,85276 | 0,02606 |
| <i>HSPA9_10</i>   | ENST00000297185 | -0,77447 | 0,13062 | 0,84951 | 0,09627 |
| <i>ELMSAN1_10</i> | ENST00000476562 | -0,43535 | 0,10054 | 1,19235 | 0,00000 |
| <i>NUMB_9</i>     | ENST00000359560 | -0,11141 | 0,90238 | 1,54823 | 0,00002 |
| <i>ETS1_3</i>     | ENST00000392668 | -0,21024 | 0,66332 | 1,45321 | 0,00000 |
| <i>SORBS1_14</i>  | ENST00000649911 | -0,64962 | 0,12581 | 1,04701 | 0,00574 |
| <i>ERCC6L2_12</i> | ENST00000320486 | -0,63339 | 0,28854 | 1,06901 | 0,03243 |
| <i>NAPRT_10</i>   | ENST00000426292 | -1,05843 | 0,01365 | 0,67318 | 0,20416 |
| <i>WDYHV1_8</i>   | ENST00000518125 | -1,06378 | 0,01599 | 0,70105 | 0,19370 |
| <i>MSL3_8</i>     | ENST00000649684 | -0,84536 | 0,12049 | 0,96629 | 0,07318 |
| <i>MARCHF8_6</i>  | ENST00000453424 | 0,60098  | 0,24215 | 2,45723 | 0,00000 |
| <i>MAN2A2_6</i>   | ENST00000558161 | -0,69950 | 0,11548 | 1,17119 | 0,00318 |
| <i>POLR2B_13</i>  | ENST00000639658 | -0,12361 | 0,92212 | 1,75553 | 0,00044 |
| <i>NXPE3_6</i>    | ENST00000273347 | -0,52787 | 0,37440 | 1,35394 | 0,00180 |
| <i>PUM2_1</i>     | ENST00000319801 | -0,79375 | 0,10858 | 1,09000 | 0,01813 |
| <i>NFAT5_3</i>    | ENST00000393742 | -0,17764 | 0,85169 | 1,70859 | 0,00005 |
| <i>MADD_2</i>     | ENST00000402799 | -0,80975 | 0,16170 | 1,08401 | 0,04383 |
| <i>RPS20_6</i>    | ENST00000519606 | -0,18565 | 0,83667 | 1,71270 | 0,00002 |
| <i>PCID2_6</i>    | ENST00000375479 | -1,82139 | 0,00005 | 0,14943 | 0,87323 |
| <i>LYN_2</i>      | ENST00000520220 | -1,29138 | 0,00003 | 0,69709 | 0,08843 |
| <i>PTPRA_5</i>    | ENST00000356147 | -1,34651 | 0,00732 | 0,67048 | 0,32462 |
| <i>ZNF706_1</i>   | ENST00000517844 | -0,51256 | 0,54840 | 1,51028 | 0,00776 |
| <i>TUT4_5</i>     | ENST00000371544 | -1,49377 | 0,00257 | 0,55346 | 0,44874 |
| <i>TMEM33_8</i>   | ENST00000513702 | -0,41173 | 0,43996 | 1,75573 | 0,00000 |
| <i>MAGT1_2</i>    | ENST00000358075 | 0,24121  | 0,82570 | 2,41732 | 0,00000 |
| <i>PHB_5</i>      | ENST00000512041 | -0,16177 | 0,88296 | 2,01896 | 0,00001 |
| <i>RBBP4_17</i>   | ENST00000458695 | -1,08056 | 0,00211 | 1,10616 | 0,00436 |
| <i>GOLGA7_6</i>   | ENST00000520817 | -0,71631 | 0,32834 | 1,51273 | 0,00747 |
| <i>RPL37A_10</i>  | ENST00000359681 | -0,19954 | 0,84653 | 2,04093 | 0,00001 |
| <i>PLEKHM2_2</i>  | ENST00000642363 | -1,32908 | 0,02599 | 0,94929 | 0,17982 |
| <i>CLINT1_3</i>   | ENST00000530742 | -1,04286 | 0,00986 | 1,23720 | 0,00321 |
| <i>PTK7_5</i>     | ENST00000481273 | -0,71699 | 0,07371 | 1,57178 | 0,00000 |
| <i>DBNL_12</i>    | ENST00000468694 | -0,81164 | 0,14124 | 1,49396 | 0,00158 |
| <i>GCH1_7</i>     | ENST00000491895 | -0,68214 | 0,27733 | 1,66528 | 0,00054 |
| <i>ADNP_4</i>     | ENST00000349014 | 0,79073  | 0,12580 | 3,13977 | 0,00000 |
| <i>TPM4_20</i>    | ENST00000588032 | -0,88157 | 0,06378 | 1,47314 | 0,00071 |
| <i>DIPK2A_1</i>   | ENST00000441925 | -0,25188 | 0,83582 | 2,18337 | 0,00016 |
| <i>GOLGA8B_1</i>  | ENST00000342314 | -1,31896 | 0,00999 | 1,13944 | 0,05000 |

|                   |                 |          |         |         |         |
|-------------------|-----------------|----------|---------|---------|---------|
| <i>CTDNEP1_10</i> | ENST00000572043 | -0,05609 | 0,94489 | 2,41490 | 0,00000 |
| <i>KDM3B_1</i>    | ENST00000542866 | -0,49369 | 0,64523 | 2,01066 | 0,00150 |
| <i>GUF1_3</i>     | ENST00000506793 | -0,45694 | 0,50447 | 2,05777 | 0,00000 |
| <i>CSDE1_5</i>    | ENST00000261443 | -0,61778 | 0,53470 | 1,93106 | 0,00277 |
| <i>ARHGAP12_2</i> | ENST00000344936 | -0,27958 | 0,82635 | 2,33897 | 0,00009 |
| <i>COPA_17</i>    | ENST00000648501 | -2,10004 | 0,00000 | 0,55585 | 0,31645 |
| <i>STOML2_2</i>   | ENST00000619795 | -1,05081 | 0,07781 | 1,81767 | 0,00067 |
| <i>CEP41_16</i>   | ENST00000223208 | -1,68368 | 0,00000 | 1,18751 | 0,00347 |
| <i>CEMIP2_6</i>   | ENST00000377066 | -0,83626 | 0,17072 | 2,32016 | 0,00000 |
| <i>RPL22_7</i>    | ENST00000497965 | -2,18231 | 0,00025 | 1,19984 | 0,12466 |
| <i>ITSN2_11</i>   | ENST00000622089 | -0,97826 | 0,17373 | 2,74489 | 0,00000 |
| <i>PQBP1_18</i>   | ENST00000472742 | -1,87884 | 0,03610 | 2,07228 | 0,02495 |
| <i>NSRP1_8</i>    | ENST00000612959 | -1,84801 | 0,00168 | 2,32271 | 0,00016 |
